# Supplementary material for: Assessment of the Efficacy of the Antihistamine Drug Rupatadine Used Alone or in Combination against Mycobacteria
Source: Preprints.org preprint supplement (doi:10.20944/preprints202406.1163.v1), 2024-06-17
Supplement: Supplementary file 1 [file supplementary]

## Sheet: Sheet1
gene_id	A1Ra_1	A1Ra_2	A1Ra_3	RTF_1	RTF_2	RTF_3	log2FoldChange	pvalue	padj	gene_name	gene_chr	gene_start	gene_end	gene_strand	gene_length	gene_biotype	gene_description	tf_family	A1Ra_1_readcount	A1Ra_2_readcount	A1Ra_3_readcount	RTF_1_readcount	RTF_2_readcount	RTF_3_readcount	A1Ra_1_fpkm	A1Ra_2_fpkm	A1Ra_3_fpkm	RTF_1_fpkm	RTF_2_fpkm	RTF_3_fpkm
Novel00013	32.3047	44.5428	33.5392	102.115	123.244	142.965	1.73899	5.22e-11	4.23e-10	-	NC_000962.3	302902	302995	-	94	-	-	-	38	46	35	101	120	119	59.6879	82.3511	61.6965	188.296	228.956	264.42
Novel00014	96.0638	94.8956	85.2854	230.518	299.894	200.631	1.40547	3.98e-12	3.58e-11	-	NC_000962.3	303542	304070	-	529	-	PF18267:Rubredoxin NAD+ reductase C-terminal domain|PF07992:Pyridine nucleotide-disulphide oxidoreductase	Pyr_redox_2	113	98	89	228	292	167	31.5394	31.1753	27.8776	75.5314	98.9979	65.9381
Novel00017	252.486	315.673	314.31	1003.97	1389.58	1221.81	2.0359	1.15e-41	6.27e-40	-	NC_000962.3	459497	460755	+	1259	-	PF07724:AAA domain (Cdc48 subfamily)|PF10431:C-terminal, D2-small domain, of ClpB protein	-	297	326	328	993	1353	1017	34.8306	43.5744	43.1687	138.22	192.74	168.722
Novel00018	45.9066	37.7646	37.3722	185.021	179.731	156.18	2.10325	1.25e-19	2e-18	-	NC_000962.3	461759	461888	+	130	-	PF02861:Clp amino terminal domain, pathogenicity island component	Clp_N	54	39	39	183	175	130	61.3311	50.4848	49.7098	246.693	241.431	208.87
Novel00023	399.558	368.931	455.175	787.603	738.437	926.268	1.00201	7.28e-13	6.98e-12	-	NC_000962.3	684884	686504	-	1621	-	PF02405:Permease MlaE	-	470	381	475	779	719	771	42.81	39.5532	48.5547	84.2176	79.5508	99.3452
Novel00034	761.71	795.961	807.815	226.474	344.056	118.937	-1.7772	2.21e-05	8.46e-05	-	NC_000962.3	879012	880061	-	1050	-	PF00890:FAD binding domain	-	896	822	843	224	335	99	125.994	131.741	133.033	37.3858	57.2208	19.6934
Novel00035	73.9607	66.8143	71.8697	149.635	173.569	271.513	1.47855	6.63e-10	4.72e-09	-	NC_000962.3	886273	886426	+	154	-	-	-	87	69	75	148	169	226	83.4121	75.3994	80.6977	168.418	196.818	306.523
Novel00036	44.2064	27.113	24.9148	86.9498	155.082	212.645	2.22891	4.38e-12	3.92e-11	-	NC_000962.3	944874	945052	-	179	-	-	-	52	28	26	86	151	177	42.8924	26.3236	24.068	84.1965	151.294	206.536
Novel00037	393.607	427.03	436.968	148.623	188.974	180.208	-1.28108	4.54e-16	5.58e-15	-	NC_000962.3	1031886	1032652	+	767	-	PF03358:NADPH-dependent FMN reductase	FMN_red	463	441	456	147	184	150	89.1284	96.7571	98.5122	33.5869	43.025	40.848
Novel00042	75.6609	71.6559	80.494	345.777	371.786	549.033	2.47253	8.97e-34	3.6e-32	-	NC_000962.3	1162712	1163395	+	684	-	PF00934:PE family	-	89	74	84	342	362	457	19.2116	18.206	20.349	87.6231	94.9186	139.552
Novel00047	454.816	490.94	463.799	1065.64	1320.77	1375.59	1.41595	4.48e-27	1.21e-25	-	NC_000962.3	1438464	1439970	-	1507	-	PF01507:Phosphoadenosine phosphosulfate reductase family|PF00009:Elongation factor Tu GTP binding domain	GTP_EFTU	535	507	484	1054	1286	1145	52.4168	56.6154	53.2173	122.568	153.048	158.697
Novel00048	62.9091	79.4025	75.7027	121.325	192.055	140.562	1.06129	6.47e-06	2.68e-05	-	NC_000962.3	1440642	1440790	-	149	-	-	-	74	82	79	120	187	117	73.329	92.612	87.8539	141.138	225.089	164.012
Novel00053	164.074	171.393	160.03	372.064	396.435	371.228	1.20222	2.23e-15	2.57e-14	-	NC_000962.3	1494097	1494453	+	357	-	PF11896:Domain of unknown function (DUF3416)	-	193	177	167	368	386	309	79.8214	83.4343	77.512	180.646	193.918	180.786
Novel00055	61.2088	64.8776	79.5358	123.347	178.704	205.437	1.30198	4.29e-08	2.42e-07	-	NC_000962.3	1574469	1574711	+	243	-	-	-	72	67	83	122	174	171	43.7478	46.399	56.5968	87.9837	128.423	146.982
Novel00059	111.366	109.42	116.908	263.882	356.381	308.756	1.46	4.38e-16	5.41e-15	-	NC_000962.3	1665558	1666013	+	456	-	PF00330:Aconitase family (aconitate hydratase)	Aconitase	131	113	122	261	347	257	42.4167	41.7016	44.3318	100.305	136.478	117.718
Novel00082	175.975	177.203	186.861	311.402	180.758	623.519	1.04597	0.0392336	0.0716711	-	NC_000962.3	2239488	2240348	-	861	-	PF00582:Universal stress protein family|PF00690:Cation transporter/ATPase, N-terminus	Usp	207	183	195	308	176	519	35.4975	35.7674	37.5277	62.6897	36.6613	125.904
Novel00083	56.1081	49.3845	71.8697	229.507	92.433	404.867	2.03408	0.000759717	0.00213114	-	NC_000962.3	2276257	2276726	+	470	-	PF05139:Erythromycin esterase	-	66	51	75	227	90	337	20.7337	18.2605	26.4414	84.6402	34.3434	149.764
Novel00117	112.216	144.28	162.905	206.253	349.191	458.929	1.27347	1e-07	5.39e-07	-	NC_000962.3	3048805	3049305	+	501	-	PF02631:RecX family	-	132	149	170	204	340	382	38.9015	50.0482	56.2253	71.3577	121.714	159.258
Novel00120	1229.28	1254.95	1238.07	2581.2	3005.1	3016.68	1.20848	8.16e-29	2.54e-27	-	NC_000962.3	3056714	3058545	+	1832	-	PF13560:Helix-turn-helix domain|PF04012:PspA/IM30 family	-	1446	1296	1292	2553	2926	2511	116.539	119.047	116.858	244.216	286.449	286.284
Novel00124	59.5086	58.0994	59.4123	157.723	181.785	235.472	1.69596	3.54e-14	3.72e-13	-	NC_000962.3	3136810	3137055	+	246	-	-	-	70	60	62	156	177	196	42.0139	41.0446	41.7616	111.132	129.044	166.416
Novel00125	27.2039	34.8596	30.6644	60.6626	86.2708	45.6527	1.06213	0.00128432	0.00341219	-	NC_000962.3	3143526	3143624	+	99	-	-	-	32	36	32	60	84	38	47.7249	61.1937	53.5593	106.21	152.175	80.1722
Novel00133	27.2039	30.018	35.4557	53.5853	94.4871	162.187	1.73896	7.84e-07	3.71e-06	-	NC_000962.3	3219460	3219673	+	214	-	-	-	32	31	37	53	92	135	22.0783	24.3774	28.6489	43.4021	77.1033	131.764
Novel00137	19.5528	11.6199	29.7061	147.612	112.974	189.819	2.88437	5.22e-20	8.69e-19	-	NC_000962.3	3232127	3232470	+	344	-	PF00909:Ammonium Transporter Family	Ammonium_transp	23	12	31	146	110	158	9.87188	5.87033	14.9322	74.3777	57.3499	95.9343
Novel00141	297.543	274.035	320.06	584.383	722.005	635.533	1.12294	1.7e-15	1.99e-14	-	NC_000962.3	3249528	3250531	-	1004	-	PF08659:KR domain	-	350	283	334	578	703	529	51.4712	47.4343	55.123	100.889	125.58	110.052
Novel00152	93.5135	79.4025	84.3271	628.869	852.438	1427.25	3.49805	1.83e-21	3.38e-20	-	NC_000962.3	3529560	3530999	+	1440	-	PF00440:Bacterial regulatory proteins, tetR family|PF00355:Rieske [2Fe-2S] domain|PF00848:Ring hydroxylating alpha subunit (catalytic domain)	TetR_N	110	82	88	622	830	1188	11.2787	9.58277	10.1261	75.6966	103.375	172.317
Novel00161	232.934	280.814	287.479	124.358	145.839	118.937	-1.03876	8.12e-09	5.1e-08	-	NC_000962.3	3638834	3639166	+	333	-	PF12005:Protein of unknown function (DUF3499)	-	274	290	300	123	142	99	121.489	146.553	149.279	64.7306	76.4791	62.0964
Novel00165	95.2137	91.0223	113.075	198.165	299.894	311.159	1.43354	5.69e-12	5.08e-11	-	NC_000962.3	3669475	3670065	+	591	-	-	-	112	94	118	196	292	259	27.9808	26.7658	33.0838	58.1189	88.6123	91.5351
Novel00166	446.314	491.908	565.375	1882.56	2797.64	2449.63	2.246	1.78e-50	1.39e-48	-	NC_000962.3	3670121	3671780	+	1660	-	PF00202:Aminotransferase class-III	Aminotran_3	525	508	590	1862	2724	2039	46.6962	51.4986	58.8931	196.571	294.305	256.557
Novel00171	48.457	40.6696	48.8714	163.789	271.137	372.43	2.54432	1.73e-21	3.21e-20	-	NC_000962.3	3784345	3784718	+	374	-	PF02811:PHP domain	-	57	42	51	162	264	310	22.5026	18.8981	22.5953	75.9088	126.599	173.127
Novel00172	950.437	1030.3	1004.26	3338.47	3658.29	4976.14	2.00376	2.76e-45	1.73e-43	-	NC_000962.3	3835263	3837436	+	2174	-	PF00166:Chaperonin 10 Kd subunit|PF00118:TCP-1/cpn60 chaperonin family	-	1118	1064	1048	3302	3562	4142	75.9299	82.361	79.8771	266.174	293.855	397.948
Novel00175	652.044	528.704	546.21	1056.54	1436.82	1835.72	1.3244	9.74e-15	1.06e-13	-	NC_000962.3	4024042	4025524	+	1483	-	PF02542:YgbB family|PF01128:2-C-methyl-D-erythritol 4-phosphate cytidylyltransferase|PF02559:CarD-like/TRCF domain	-	767	546	570	1045	1399	1528	76.3633	61.9571	63.6875	123.488	169.19	215.208
Novel00190	148.771	132.66	106.367	215.352	268.056	398.86	1.18107	9.88e-08	5.31e-07	-	NC_000962.3	4259839	4260087	+	249	-	PF02801:Beta-ketoacyl synthase, C-terminal domain	Ketoacyl-synt_C	175	137	111	213	261	332	103.769	92.5893	73.8659	149.909	187.992	278.493
Novel00192	227.833	212.063	171.529	42.4638	58.5409	51.6596	-2.00393	1.32e-18	1.93e-17	-	NC_000962.3	4291457	4291911	+	455	-	-	-	268	219	179	42	57	43	86.9668	80.9976	65.1872	16.1766	22.4679	19.7393
Novel00193	116.467	128.787	115.95	32.3534	49.2976	31.236	-1.67204	3.02e-10	2.26e-09	-	NC_000962.3	4294099	4294300	+	202	-	PF08659:KR domain	-	137	133	121	32	48	26	100.138	110.8	99.2555	27.7618	42.6176	26.8842
Novel00194	85.8624	100.706	92.9514	19.2098	30.811	40.8471	-1.63345	6.88e-08	3.79e-07	-	NC_000962.3	4296660	4296771	+	112	-	PF14765:Polyketide synthase dehydratase	-	101	104	97	19	30	34	133.148	156.263	143.507	29.7293	48.0399	63.4069
Novel00195	136.87	105.547	114.033	27.2982	58.5409	22.8263	-1.7053	3.14e-08	1.81e-07	-	NC_000962.3	4297419	4297499	+	81	-	-	-	161	109	119	27	57	19	293.475	226.455	243.435	58.4154	126.209	48.9941
Novel00196	190.427	215.936	188.778	52.5743	51.3517	37.243	-2.0671	4.58e-20	7.7e-19	-	NC_000962.3	4298214	4298518	+	305	-	PF02801:Beta-ketoacyl synthase, C-terminal domain|PF16197:Ketoacyl-synthetase C-terminal extension	Ketoacyl-synt_C	224	223	197	52	50	31	108.437	123.04	107.025	29.878	29.4015	21.2294
Novel00198	26.3538	29.0497	37.3722	184.01	198.217	281.124	2.83895	9.54e-29	2.94e-27	-	NC_000962.3	4326957	4327171	+	215	-	-	-	31	30	39	182	193	234	21.2889	23.4813	30.0571	148.348	160.997	227.328
Rv0023	192.978	218.841	243.399	791.647	861.681	737.651	1.86991	1.23e-39	6.21e-38	Rv0023	NC_000962.3	27595	28365	+	771	protein_coding	transcriptional regulator&&sp|P67705|Y023_MYCBO Uncharacterized HTH-type transcriptional regulator Mb0023 OS=Mycobacterium bovis (strain ATCC BAA-935 / AF2122/97) OX=233413 GN=BQ2027_MB0023 PE=4 SV=1 && PF01381:Helix-turn-helix	HTH_3	227	226	254	783	839	614	43.4712	49.328	54.5883	177.974	195.167	166.337
Rv0024	511.774	543.229	510.754	1218.31	1411.14	1039.2	1.22938	5.74e-20	9.53e-19	Rv0024	NC_000962.3	28362	29207	+	846	protein_coding	NLP/P60 family protein&&sp|P9WHU2|Y2190_MYCTO Probable endopeptidase MT2245 OS=Mycobacterium tuberculosis (strain CDC 1551 / Oshkosh) OX=83331 GN=MT2245 PE=3 SV=1 && PF00877:NlpC/P60 family	-	602	561	533	1205	1374	865	105.065	111.592	104.394	249.612	291.283	213.561
Rv0033	26.3538	41.6379	28.7479	10.1104	18.4866	18.0208	-1.05673	0.0170804	0.0344608	acpA	NC_000962.3	36607	36870	+	264	protein_coding	acyl carrier protein AcpA&&-- && PF00550:Phosphopantetheine attachment site	PP-binding	31	43	30	10	18	15	17.3376	27.4097	18.8295	6.63811	12.2283	11.8676
Rv0040c	1763.15	1723.61	1726.79	411.495	495.03	406.068	-1.9888	4.72e-61	5.74e-59	mtc28	NC_000962.3	42433	43365	-	933	protein_coding	hypothetical protein&&sp|P0A5Q7|PR28_MYCBO Proline-rich 28 kDa antigen OS=Mycobacterium bovis (strain ATCC BAA-935 / AF2122/97) OX=233413 GN=mtc28 PE=3 SV=1 && PF10738:Probable lipoprotein LpqN	-	2074	1780	1802	407	482	338	328.214	321.054	320.032	76.4471	92.654	75.6677
Rv0053	969.14	952.83	782.9	408.462	476.544	424.089	-1.04701	1.06e-14	1.16e-13	rpsF	NC_000962.3	58192	58482	+	291	protein_coding	30S ribosomal protein S6&&sp|P66592|RS6_MYCBO 30S ribosomal protein S6 OS=Mycobacterium bovis (strain ATCC BAA-935 / AF2122/97) OX=233413 GN=rpsF PE=3 SV=1 && PF01250:Ribosomal protein S6	-	1140	984	817	404	464	353	578.418	569.039	465.21	243.297	285.972	253.371
Rv0063	1254.78	1267.53	1305.15	539.897	621.355	569.457	-1.14486	3.46e-23	7.19e-22	Rv0063	NC_000962.3	66923	68362	+	1440	protein_coding	oxidoreductase&&sp|Q796Y5|YGAK_BACSU Uncharacterized FAD-linked oxidoreductase YgaK OS=Bacillus subtilis (strain 168) OX=224308 GN=ygaK PE=3 SV=4 && PF01565:FAD binding domain|PF08031:Berberine and berberine like	FAD_binding_4	1476	1309	1362	534	605	474	151.34	152.974	156.724	64.9871	75.3515	68.7529
Rv0067c	119.017	94.8956	79.5358	179.966	181.785	275.117	1.11128	7.65e-07	3.63e-06	Rv0067c	NC_000962.3	74629	75198	-	570	protein_coding	transcriptional regulator&&-- && PF00440:Bacterial regulatory proteins, tetR family	TetR_N	140	98	83	178	177	229	36.2646	28.9328	24.1281	54.726	55.6926	83.9143
Rv0071	81.6118	66.8143	76.661	175.922	155.082	224.659	1.29869	2.06e-09	1.39e-08	Rv0071	NC_000962.3	79486	80193	+	708	protein_coding	maturase&&sp|Q47688|YKFC_ECOLI Protein YkfC OS=Escherichia coli (strain K12) OX=83333 GN=ykfC PE=4 SV=3 && PF00078:Reverse transcriptase (RNA-dependent DNA polymerase)	RVT_1	96	69	80	174	151	187	20.0202	16.4004	18.7231	43.069	38.251	55.1676
Rv0082	229.533	246.922	279.813	541.92	466.273	874.609	1.31457	4.12e-11	3.36e-10	Rv0082	NC_000962.3	89924	90403	+	480	protein_coding	oxidoreductase&&sp|P16433|HYCG_ECOLI Formate hydrogenlyase subunit 7 OS=Escherichia coli (strain K12) OX=83333 GN=hycG PE=1 SV=2 && PF01058:NADH ubiquinone oxidoreductase, 20 Kd subunit	-	270	255	292	536	454	728	83.0525	89.4002	100.8	195.692	169.634	316.786
Rv0083	379.155	397.981	452.3	1019.13	763.086	899.838	1.126	2.59e-15	2.98e-14	Rv0083	NC_000962.3	90400	92322	+	1923	protein_coding	oxidoreductase&&sp|P9WIW2|Y051_MYCTO Uncharacterized protein MT0090 OS=Mycobacterium tuberculosis (strain CDC 1551 / Oshkosh) OX=83331 GN=MT0090 PE=3 SV=1 && PF00361:Proton-conducting membrane transporter	-	446	411	472	1008	743	749	34.2441	35.9668	40.6708	91.8607	69.296	81.3538
Rv0084	393.607	489.971	478.173	852.31	851.411	1068.03	1.02537	5.46e-13	5.29e-12	hycD	NC_000962.3	92328	93278	+	951	protein_coding	formate hydrogenlyase HycD&&sp|P16430|HYCD_ECOLI Formate hydrogenlyase subunit 4 OS=Escherichia coli (strain K12) OX=83333 GN=hycD PE=1 SV=1 && PF00146:NADH dehydrogenase	-	463	506	499	843	829	889	71.8838	89.5385	86.9442	155.344	156.341	195.253
Rv0085	178.526	202.379	193.569	505.522	414.922	444.513	1.25005	2.18e-16	2.75e-15	hycP	NC_000962.3	93289	93951	+	663	protein_coding	hydrogenase HycP&&sp|P9WM74|Y085_MYCTO Uncharacterized protein MT0092 OS=Mycobacterium tuberculosis (strain CDC 1551 / Oshkosh) OX=83331 GN=MT0092 PE=4 SV=1 && -	-	210	209	202	500	404	370	46.7666	53.0484	50.4845	132.161	109.287	116.564
Rv0088	2798.6	3037.63	2628.51	1101.03	1342.33	1535.37	-1.09001	7.56e-17	9.77e-16	Rv0088	NC_000962.3	96927	97601	+	675	protein_coding	polyketide cyclase/dehydrase&&sp|P9WM73|Y088_MYCTU Uncharacterized protein Rv0088 OS=Mycobacterium tuberculosis (strain ATCC 25618 / H37Rv) OX=83332 GN=Rv0088 PE=1 SV=1 && PF10604:Polyketide cyclase / dehydrase and lipid transport	-	3292	3137	2743	1089	1307	1278	720.089	782.079	673.352	282.73	347.273	395.46
Rv0089	595.086	580.025	585.498	208.275	274.218	327.978	-1.12297	2.88e-12	2.63e-11	Rv0089	NC_000962.3	97758	98351	+	594	protein_coding	methyltransferase&&sp|P9WK02|Y089_MYCTO Uncharacterized methyltransferase MT0098 OS=Mycobacterium tuberculosis (strain CDC 1551 / Oshkosh) OX=83331 GN=MT0098 PE=3 SV=1 && PF08241:Methyltransferase domain	Methyltransf_11	700	599	611	206	267	273	173.997	169.699	170.441	60.7756	80.6164	95.9957
Rv0100	53.5577	107.484	88.1601	42.4638	27.7299	46.854	-1.09147	0.000701144	0.00198122	Rv0100	NC_000962.3	109783	110019	+	237	protein_coding	hypothetical protein&&sp|P64688|AC100_MYCBO Acyl carrier protein BQ2027_MB0103 OS=Mycobacterium bovis (strain ATCC BAA-935 / AF2122/97) OX=233413 GN=BQ2027_MB0103 PE=3 SV=1 && PF00550:Phosphopantetheine attachment site	PP-binding	63	111	92	42	27	39	39.2484	78.816	64.3221	31.0563	20.4322	34.371
Rv0111	2186.51	2347.21	2290.25	945.326	1055.79	1189.37	-1.09774	3.86e-21	6.96e-20	Rv0111	NC_000962.3	133950	136007	+	2058	protein_coding	acyltransferase&&sp|O05402|YRHL_BACSU Putative peptidoglycan O-acetyltransferase YrhL OS=Bacillus subtilis (strain 168) OX=224308 GN=yrhL PE=3 SV=1 && PF01757:Acyltransferase family	-	2572	2424	2390	935	1028	990	184.525	198.211	192.43	79.6186	89.5873	100.477
Rv0112	755.759	866.649	771.401	238.606	261.894	266.708	-1.64236	3.48e-34	1.44e-32	gca	NC_000962.3	136289	137245	+	957	protein_coding	GDP-mannose 4%2C6-dehydratase&&sp|Q6T1X6|RMD_ANETH GDP-6-deoxy-D-mannose reductase OS=Aneurinibacillus thermoaerophilus OX=143495 GN=rmd PE=1 SV=1 && PF16363:GDP-mannose 4,6 dehydratase	-	889	895	805	236	255	222	137.158	157.38	139.381	43.2164	47.7889	48.4525
Rv0113	598.486	752.387	719.655	143.568	196.163	225.861	-1.87581	2.62e-28	7.85e-27	gmhA	NC_000962.3	137319	137909	+	591	protein_coding	phosphoheptose isomerase&&sp|P0A605|GMHA_MYCBO Phosphoheptose isomerase OS=Mycobacterium bovis (strain ATCC BAA-935 / AF2122/97) OX=233413 GN=gmhA PE=3 SV=1 && PF13580:SIS domain	-	704	777	751	142	191	188	175.88	221.245	210.559	42.1065	57.9622	66.4425
Rv0114	190.427	197.538	192.611	41.4528	78.0545	55.2637	-1.73116	8.76e-14	9.04e-13	gmhB	NC_000962.3	137941	138513	+	573	protein_coding	D-glycero-alpha-D-manno-heptose-1%2C7-bisphosphate 7-phosphatase&&sp|P9WMV2|GMHBA_MYCTO D-glycero-alpha-D-manno-heptose-1,7-bisphosphate 7-phosphatase OS=Mycobacterium tuberculosis (strain CDC 1551 / Oshkosh) OX=83331 GN=gmhB PE=3 SV=1 && -	-	224	204	201	41	76	46	57.7197	59.9122	58.1249	12.5394	23.788	16.7679
Rv0115	338.349	417.347	344.974	171.877	202.326	130.951	-1.11869	6.01e-10	4.32e-09	hddA	NC_000962.3	138513	139673	+	1161	protein_coding	D-alpha-D-heptose-7-phosphate kinase HddA&&sp|O53637|HDDA_MYCTU D-glycero-alpha-D-manno-heptose 7-phosphate kinase OS=Mycobacterium tuberculosis (strain ATCC 25618 / H37Rv) OX=83332 GN=hddA PE=1 SV=1 && PF08544:GHMP kinases C terminal|PF00288:GHMP kinases N terminal domain	GHMP_kinases	398	431	360	170	197	109	50.6152	62.4719	51.3796	25.6605	30.4322	19.6096
Rv0115a	762.56	501.591	437.926	211.308	220.812	261.902	-1.29729	1.94e-11	1.62e-10	Rv0115a	NC_000962.3	139956	140144	+	189	protein_coding	hypothetical protein&&-- && -	-	897	518	457	209	215	218	700.746	461.219	400.659	193.791	204.021	240.918
Rv0129c	13411.5	13987.4	12489	2629.73	4835.27	3319.43	-1.88694	6.5e-30	2.13e-28	fbpC	NC_000962.3	156578	157600	-	1023	protein_coding	diacylglycerol acyltransferase/mycolyltransferase Ag85C&&sp|P0A4V5|A85C_MYCBO Diacylglycerol acyltransferase/mycolyltransferase Ag85C OS=Mycobacterium bovis (strain ATCC BAA-935 / AF2122/97) OX=233413 GN=fbpC PE=3 SV=1 && PF00756:Putative esterase	-	15776	14445	13033	2601	4708	2763	2276.94	2376.19	2111	445.567	825.391	564.132
Rv0149	1690.04	1925.99	1881.07	864.443	938.709	919.06	-1.01379	7.42e-20	1.22e-18	Rv0149	NC_000962.3	175700	176668	+	969	protein_coding	quinone oxidoreductase&&sp|O97764|QOR_BOVIN Zeta-crystallin OS=Bos taurus OX=9913 GN=CRYZ PE=2 SV=2 && PF08240:Alcohol dehydrogenase GroES-like domain|PF00107:Zinc-binding dehydrogenase	ADH_zinc_N	1988	1989	1963	855	914	765	302.916	345.423	335.673	154.629	169.169	164.897
Rv0168	1163.82	1184.26	1344.44	685.488	559.733	567.054	-1.02579	1.26e-15	1.49e-14	yrbE1B	NC_000962.3	197660	198529	+	870	protein_coding	membrane protein&&sp|Q1RGU3|Y1340_RICBR Probable ABC transporter permease protein RBE_1340 OS=Rickettsia bellii (strain RML369-C) OX=336407 GN=RBE_1340 PE=3 SV=1 && PF02405:Permease MlaE	-	1369	1223	1403	678	545	472	232.335	236.563	267.214	136.571	112.351	113.318
Rv0169	3479.55	3770.65	3944.21	1660.13	1528.23	1808.09	-1.16418	2.88e-26	7.26e-25	mce1A	NC_000962.3	198534	199898	+	1365	protein_coding	Mce family protein Mce1A&&-- && PF02470:MlaD protein|PF11887:Cholesterol uptake porter CUP1 of Mce4, putative	-	4093	3894	4116	1642	1488	1505	442.73	480.068	499.647	210.809	195.51	230.292
Rv0170	1506.42	1778.81	1610.84	759.294	638.815	884.22	-1.10221	3.48e-16	4.32e-15	mce1B	NC_000962.3	199895	200935	+	1041	protein_coding	Mce family protein Mce1B&&-- && PF02470:MlaD protein	-	1772	1837	1681	751	622	736	251.329	296.96	267.57	126.426	107.161	147.673
Rv0171	3334.18	3645.74	3920.25	1519.6	1486.12	1583.43	-1.24814	1.21e-31	4.4e-30	mce1C	NC_000962.3	200932	202479	+	1548	protein_coding	Mce family protein Mce1C&&-- && PF02470:MlaD protein	-	3922	3765	4091	1503	1447	1318	374.082	409.292	437.904	170.152	167.647	177.836
Rv0172	2739.09	3024.07	2695.59	1133.38	1004.44	1030.79	-1.41625	2.15e-38	1.07e-36	mce1D	NC_000962.3	202476	204068	+	1593	protein_coding	Mce family protein Mce1D&&-- && PF11887:Cholesterol uptake porter CUP1 of Mce4, putative|PF02470:MlaD protein	-	3222	3123	2813	1121	978	858	298.635	329.91	292.6	123.321	110.109	112.499
Rv0173	1368.7	1498.96	1472.85	657.179	661.41	666.769	-1.12833	1.72e-24	3.82e-23	lprK	NC_000962.3	204065	205237	+	1173	protein_coding	Mce family lipoprotein LprK&&sp|I6Y3P1|LPRN_MYCTU Lipoprotein LprN OS=Mycobacterium tuberculosis (strain ATCC 25618 / H37Rv) OX=83332 GN=lprN PE=1 SV=1 && PF02470:MlaD protein	-	1610	1548	1537	650	644	555	202.655	222.082	217.118	97.11	98.4661	98.8258
Rv0179c	4013.43	4504.64	3965.29	1399.28	1716.17	1665.12	-1.38499	4.73e-33	1.83e-31	lprO	NC_000962.3	209703	210812	-	1110	protein_coding	lipoprotein LprO&&-- && PF09992:Phosphodiester glycosidase	-	4721	4652	4138	1384	1671	1386	627.974	705.272	617.715	218.505	269.993	260.805
Rv0186A	1013.35	989.626	911.308	5854.96	9331.63	12745.5	3.26063	9.81e-26	2.36e-24	mymT	NC_000962.3	218390	218551	-	162	protein_coding	metallothionein&&sp|P9WK08|MYMT_MYCTO Metallothionein OS=Mycobacterium tuberculosis (strain CDC 1551 / Oshkosh) OX=83331 GN=mymT PE=3 SV=1 && -	-	1192	1022	951	5791	9086	10609	1086.4	1061.64	972.716	6264.51	10059	13678.4
Rv0195	23.8034	18.3981	15.3322	78.8614	96.5412	111.729	2.3089	3.71e-13	3.66e-12	Rv0195	NC_000962.3	230899	231534	+	636	protein_coding	two component transcriptional regulator&&-- && PF00196:Bacterial regulatory proteins, luxR family	GerE	28	19	16	78	94	93	6.50027	5.02732	4.16853	21.4925	26.5075	30.5423
Rv0250c	567.032	600.36	539.502	2633.77	3002.02	2737.96	2.29463	1.29e-93	3.81e-91	Rv0250c	NC_000962.3	301735	302028	-	294	protein_coding	hypothetical protein&&sp|O53672|Y250_MYCTU Uncharacterized protein Rv0250c OS=Mycobacterium tuberculosis (strain ATCC 25618 / H37Rv) OX=83332 GN=Rv0250c PE=1 SV=1 && -	-	667	620	563	2605	2923	2279	334.972	354.882	317.308	1552.78	1783.12	1619.1
Rv0251c	407.209	428.967	319.101	9767.7	13470.6	11047.9	4.89093	3.68e-257	1.52e-253	hsp	NC_000962.3	302173	302652	-	480	protein_coding	heat shock protein&&-- && PF00011:Hsp20/alpha crystallin family	-	479	443	333	9661	13116	9196	147.341	155.311	114.954	3527.19	4900.71	4001.59
Rv0252	1166.37	1208.47	1444.1	4567.9	3883.21	4698.62	1.78396	4.09e-48	2.92e-46	nirB	NC_000962.3	302866	305427	+	2562	protein_coding	nitrite reductase large subunit NirB&&sp|Q06458|NIRB_KLEOX Nitrite reductase [NAD(P)H] large subunit OS=Klebsiella oxytoca OX=571 GN=nasB PE=3 SV=1 && PF04324:BFD-like [2Fe-2S] binding domain|PF01077:Nitrite and sulphite reductase 4Fe-4S domain|PF03460:Nitrite/Sulfite reductase ferredoxin-like half domain|PF07992:Pyridine nucleotide-disulphide oxidoreductase|PF18267:Rubredoxin NAD+ reductase C-te…	Pyr_redox_2	1372	1248	1507	4518	3781	3911	79.0688	81.9738	97.4663	309.041	264.683	318.848
Rv0259c	216.781	236.271	302.811	679.422	443.678	478.151	1.08497	3.52e-09	2.31e-08	Rv0259c	NC_000962.3	310774	311517	-	744	protein_coding	hypothetical protein&&-- && PF01903:CbiX	-	255	244	316	672	432	398	50.6055	55.1895	70.3776	158.287	104.138	111.734
Rv0260c	231.233	188.823	242.44	1976.59	1537.47	2174.51	3.10089	8.53e-92	2.2e-89	Rv0260c	NC_000962.3	311514	312659	-	1146	protein_coding	transcriptional regulator&&-- && PF02602:Uroporphyrinogen-III synthase HemD|PF00486:Transcriptional regulatory protein, C terminal	HEM4	272	195	253	1955	1497	1810	35.0441	28.6345	36.5811	298.958	234.28	329.89
Rv0261c	188.727	187.855	178.237	598.538	582.328	964.713	1.94925	1.51e-25	3.52e-24	narK3	NC_000962.3	312759	314168	-	1410	protein_coding	nitrate/nitrite transporter&&sp|Q9RA45|NARK2_THETH Probable nitrate/nitrite antiporter NarK2 OS=Thermus thermophilus OX=274 GN=narK2 PE=3 SV=2 && PF07690:Major Facilitator Superfamily	MFS_1	222	194	186	592	567	803	23.2469	23.1538	21.8582	73.5785	72.1212	118.952
Rv0267	200.629	167.52	226.15	961.503	774.383	885.421	2.14061	6.36e-46	4.05e-44	narU	NC_000962.3	321331	322722	+	1392	protein_coding	nitrite extrusion protein NarU&&sp|P10903|NARK_ECOLI Nitrate/nitrite transporter NarK OS=Escherichia coli (strain K12) OX=83333 GN=narK PE=1 SV=2 && PF07690:Major Facilitator Superfamily	MFS_1	236	173	236	951	754	737	25.0324	20.9145	28.0927	119.726	97.1473	110.587
Rv0275c	150.472	145.248	137.032	319.49	301.948	326.777	1.1304	1.87e-12	1.74e-11	Rv0275c	NC_000962.3	330933	331658	-	726	protein_coding	transcriptional regulator&&-- && -	-	177	150	143	316	294	272	35.9971	34.7692	32.6377	76.2779	72.6289	78.2542
Rv0309	2726.34	2916.59	2837.41	1312.34	1245.79	1353.96	-1.1164	6.02e-28	1.72e-26	Rv0309	NC_000962.3	377931	378587	+	657	protein_coding	hypothetical protein&&-- && -	-	3207	3012	2961	1298	1213	1127	720.716	771.488	746.781	346.224	331.127	358.289
Rv0312	1291.34	1481.53	1369.36	344.766	385.138	240.277	-2.09028	1.02e-41	5.63e-40	Rv0312	NC_000962.3	380556	382418	+	1863	protein_coding	hypothetical protein&&-- && PF00012:Hsp70 protein	HSP70	1519	1530	1429	341	375	200	120.386	138.203	127.098	32.0767	36.1008	22.4229
Rv0322	2076	2105.13	1997.98	527.765	583.355	385.645	-2.04301	1.14e-47	7.85e-46	udgA	NC_000962.3	389260	390591	+	1332	protein_coding	UDP-glucose 6-dehydrogenase UdgA&&sp|O54068|UDG_RHIME UDP-glucose 6-dehydrogenase OS=Rhizobium meliloti (strain 1021) OX=266834 GN=rkpK PE=1 SV=2 && PF03720:UDP-glucose/GDP-mannose dehydrogenase family, UDP binding domain|PF03721:UDP-glucose/GDP-mannose dehydrogenase family, NAD binding domain|PF00984:UDP-glucose/GDP-mannose dehydrogenase family, central domain	-	2442	2174	2085	522	568	321	270.69	274.66	259.372	68.6775	76.4791	50.3357
Rv0324	130.069	103.611	115.95	212.319	209.515	300.346	1.04137	1.88e-07	9.74e-07	Rv0324	NC_000962.3	391352	392032	+	681	protein_coding	transcriptional regulator&&-- && PF00581:Rhodanese-like domain|PF12840:Helix-turn-helix domain	Rhodanese	153	107	121	210	204	250	33.1722	26.4409	29.4414	54.0407	53.7257	76.6776
Rv0326	92.6633	91.0223	85.2854	170.866	158.163	217.451	1.01891	6.92e-07	3.31e-06	Rv0326	NC_000962.3	392273	392728	+	456	protein_coding	hypothetical protein&&-- && PF13649:Methyltransferase domain	-	109	94	89	169	154	181	35.2933	34.6899	32.3404	64.9487	60.5696	82.9066
Rv0327c	102.865	97.8006	99.6593	291.181	330.705	282.326	1.59037	7.89e-20	1.29e-18	cyp135A1	NC_000962.3	392696	394045	-	1350	protein_coding	cytochrome P450 Cyp135A1&&sp|P9WPN0|C135A_MYCTO Putative cytochrome P450 135A1 OS=Mycobacterium tuberculosis (strain CDC 1551 / Oshkosh) OX=83331 GN=cyp135A1 PE=3 SV=1 && PF00067:Cytochrome P450	p450	121	101	104	288	322	235	13.2337	12.59	12.765	37.3858	42.778	36.3588
Rv0330c	74.8108	77.4658	38.3305	141.546	125.298	128.548	1.05058	4.75e-05	0.000169161	Rv0330c	NC_000962.3	395347	396087	-	741	protein_coding	hypothetical protein&&-- && PF00440:Bacterial regulatory proteins, tetR family	TetR_N	88	80	40	140	122	107	17.5346	18.1682	8.94463	33.1099	29.5284	30.1607
Rv0331	149.622	144.28	136.073	345.777	354.327	224.659	1.10726	9.78e-09	6.09e-08	Rv0331	NC_000962.3	396201	397367	+	1167	protein_coding	dehydrogenase/reductase&&-- && PF07992:Pyridine nucleotide-disulphide oxidoreductase	Pyr_redox_2	176	149	142	342	345	187	22.2675	21.486	20.1622	51.3575	53.0209	33.4693
Rv0336	53.5577	53.2578	47.9131	119.303	137.622	148.972	1.38854	2.55e-09	1.7e-08	Rv0336	NC_000962.3	400192	401703	+	1512	protein_coding	hypothetical protein&&sp|P9WLJ2|Y2100_MYCTO Uncharacterized protein MT2160 OS=Mycobacterium tuberculosis (strain CDC 1551 / Oshkosh) OX=83331 GN=MT2160 PE=3 SV=1 && PF02720:Domain of unknown function (DUF222)	DUF222	63	55	50	118	134	124	6.15204	6.1214	5.47947	13.6766	15.8947	17.1295
Rv0339c	465.867	457.048	452.3	1254.71	1259.14	1433.25	1.52033	8.59e-38	4.08e-36	Rv0339c	NC_000962.3	405950	408448	-	2499	protein_coding	transcriptional regulator&&-- && PF00196:Bacterial regulatory proteins, luxR family	GerE	548	472	472	1241	1226	1193	32.3776	31.7845	31.2965	87.027	87.9879	99.7125
Rv0350	3870.61	3524.69	3118.19	39353.9	39381.6	56146.8	3.68125	2.43e-147	2.51e-144	dnaK	NC_000962.3	419835	421712	+	1878	protein_coding	chaperone protein DnaK&&sp|P0A5C0|DNAK_MYCBO Chaperone protein DnaK OS=Mycobacterium bovis (strain ATCC BAA-935 / AF2122/97) OX=233413 GN=dnaK PE=3 SV=2 && PF00012:Hsp70 protein|PF10712:NAD-specific glutamate dehydrogenase	HSP70	4553	3640	3254	38924	38345	46735	357.958	326.171	287.106	3632.2	3661.95	5197.83
Rv0351	531.327	554.849	441.759	6004.59	6444.64	8118.96	3.75032	7.18e-166	1.48e-162	grpE	NC_000962.3	421709	422416	+	708	protein_coding	stress response protein GrpE&&sp|Q7U272|GRPE_MYCBO Protein GrpE OS=Mycobacterium bovis (strain ATCC BAA-935 / AF2122/97) OX=233413 GN=grpE PE=3 SV=1 && PF01025:GrpE	-	625	573	461	5939	6275	6758	130.34	136.195	107.892	1470.04	1589.57	1993.7
Rv0352	1792.06	1697.47	1604.13	12513.7	12966.3	17195.4	3.06638	4.54e-124	2.35e-121	dnaJ1	NC_000962.3	422452	423639	+	1188	protein_coding	chaperone protein DnaJ&&sp|P0A549|DNAJ1_MYCBO Chaperone protein DnaJ 1 OS=Mycobacterium bovis (strain ATCC BAA-935 / AF2122/97) OX=233413 GN=dnaJ1 PE=3 SV=1 && PF00226:DnaJ domain|PF00684:DnaJ central domain|PF01556:DnaJ C terminal domain	DnaJ_C	2108	1753	1674	12377	12625	14313	261.99	248.316	233.485	1825.78	1905.96	2516.46
Rv0353	299.243	253.701	266.397	1505.44	1452.23	2134.86	2.63402	5.92e-63	7.42e-61	hspR	NC_000962.3	423639	424019	+	381	protein_coding	heat shock protein transcriptional repressor HspR&&sp|P40183|HSPR_STRCO Putative heat shock protein HspR OS=Streptomyces coelicolor (strain ATCC BAA-471 / A3(2) / M145) OX=100226 GN=hspR PE=2 SV=2 && PF13411:MerR HTH family regulatory protein	-	352	262	278	1489	1414	1777	136.411	115.722	120.904	684.886	665.615	974.177
Rv0356c	363.852	421.22	378.514	159.745	196.163	144.166	-1.21489	2.51e-13	2.52e-12	Rv0356c	NC_000962.3	434830	435474	-	645	protein_coding	hypothetical protein&&-- && PF03061:Thioesterase superfamily	4HBT	428	435	395	158	191	120	97.9748	113.493	101.475	42.9285	53.1095	38.8595
Rv0384c	1313.44	1271.41	1303.24	7316.92	8147.46	9245.86	2.66776	2.07e-124	1.22e-121	clpB	NC_000962.3	459456	462002	-	2547	protein_coding	chaperone protein ClpB&&sp|P63287|CLPB_MYCBO Chaperone protein ClpB OS=Mycobacterium bovis (strain ATCC BAA-935 / AF2122/97) OX=233413 GN=clpB PE=3 SV=1 && PF00004:ATPase family associated with various cellular activities (AAA)|PF02861:Clp amino terminal domain, pathogenicity island component|PF07724:AAA domain (Cdc48 subfamily)|PF17871:AAA lid domain|PF10431:C-terminal, D2-small domain, of ClpB …	Clp_N	1545	1313	1360	7237	7933	7696	89.5632	86.7512	88.477	497.941	558.608	631.119
Rv0402c	1119.61	1211.37	1329.11	586.405	600.815	570.658	-1.05734	8.38e-19	1.25e-17	mmpL1	NC_000962.3	480355	483231	-	2877	protein_coding	transmembrane transport protein MmpL1&&sp|P9WJV8|MMPL1_MYCTO Probable transport protein MmpL1 OS=Mycobacterium tuberculosis (strain CDC 1551 / Oshkosh) OX=83331 GN=mmpL1 PE=3 SV=1 && PF03176:MMPL family	-	1317	1251	1387	580	585	475	67.589	73.174	79.8835	35.3294	36.4682	34.4849
Rv0404	1826.06	1993.78	1829.32	699.642	798.005	812.137	-1.29087	9.95e-30	3.19e-28	fadD30	NC_000962.3	483977	485734	+	1758	protein_coding	long-chain-fatty-acid--AMP ligase FadD30&&sp|P9WQ56|FAA30_MYCTO Probable long-chain-fatty-acid--AMP ligase FadD30 OS=Mycobacterium tuberculosis (strain CDC 1551 / Oshkosh) OX=83331 GN=fadD30 PE=3 SV=1 && PF00501:AMP-binding enzyme	AMP-binding	2148	2059	1909	692	777	676	180.404	197.096	179.932	68.982	79.2686	80.3162
Rv0426c	468.417	541.292	413.969	1138.44	1158.49	1238.63	1.31221	4.09e-24	8.89e-23	Rv0426c	NC_000962.3	515373	515816	-	444	protein_coding	transmembrane protein&&-- && -	-	551	559	432	1126	1128	1031	183.231	211.87	161.221	444.431	455.643	485.01
Rv0430	3766.89	4253.84	4431.01	1476.12	1766.5	2071.19	-1.22912	7.68e-21	1.36e-19	Rv0430	NC_000962.3	518733	519041	+	309	protein_coding	hypothetical protein&&-- && PF11662:Protein of unknown function (DUF3263)	-	4431	4393	4624	1460	1720	1724	2117.26	2392.45	2479.59	828.024	998.318	1165.34
Rv0440	9575.78	7422.19	7191.76	41220.3	32741.8	58088.2	2.44853	9.89e-47	6.6e-45	groEL2	NC_000962.3	528608	530230	+	1623	protein_coding	molecular chaperone GroEL&&sp|A5TZG6|CH601_MYCTA 60 kDa chaperonin 1 OS=Mycobacterium tuberculosis (strain ATCC 25177 / H37Ra) OX=419947 GN=groL1 PE=3 SV=1 && PF00118:TCP-1/cpn60 chaperonin family	-	11264	7665	7505	40770	31880	48351	1024.72	794.755	766.218	4402.21	3522.89	6222.46
Rv0461	611.238	629.41	639.161	305.335	271.137	300.346	-1.10053	8.08e-17	1.04e-15	Rv0461	NC_000962.3	552026	552550	+	525	protein_coding	transmembrane protein&&-- && -	-	719	650	667	302	264	250	202.209	208.35	210.517	100.808	90.1869	99.4617
Rv0492A	11.9017	15.4932	12.4574	19.2098	39.0273	33.6388	1.20515	0.00882047	0.0193956	Rv0492A	NC_000962.3	583375	583704	-	330	protein_coding	hypothetical protein&&-- && -	-	14	16	13	19	38	28	6.26389	8.15916	6.52754	10.0899	20.6523	17.7223
Rv0509	1973.13	1945.36	1984.56	4156.4	3678.83	4257.71	1.03447	1.39e-23	2.97e-22	hemA	NC_000962.3	600441	601847	+	1407	protein_coding	glutamyl-tRNA reductase&&sp|P64329|HEM1_MYCBO Glutamyl-tRNA reductase OS=Mycobacterium bovis (strain ATCC BAA-935 / AF2122/97) OX=233413 GN=hemA PE=3 SV=1 && PF00745:Glutamyl-tRNAGlu reductase, dimerisation domain|PF01488:Shikimate / quinate 5-dehydrogenase|PF05201:Glutamyl-tRNAGlu reductase, N-terminal domain	-	2321	2009	2071	4111	3582	3544	243.563	240.284	243.897	512.038	456.594	526.108
Rv0510	1122.16	1059.35	1102.96	2736.9	2297.47	2993.85	1.28894	1.37e-26	3.57e-25	hemC	NC_000962.3	601857	602786	+	930	protein_coding	porphobilinogen deaminase&&sp|P64337|HEM3_MYCBO Porphobilinogen deaminase OS=Mycobacterium bovis (strain ATCC BAA-935 / AF2122/97) OX=233413 GN=hemC PE=3 SV=1 && PF01379:Porphobilinogen deaminase, dipyromethane cofactor binding domain|PF03900:Porphobilinogen deaminase, C-terminal domain	-	1320	1094	1151	2707	2237	2492	209.566	197.958	205.075	510.098	431.402	559.681
Rv0511	2197.57	2140.96	2365.95	7645.51	6109.82	7010.09	1.63101	1.76e-47	1.19e-45	hemD	NC_000962.3	602819	604516	+	1698	protein_coding	uroporphyrin-III C-methyltransferase&&sp|Q46BL0|SUMT_METBF S-adenosyl-L-methionine-dependent uroporphyrinogen III methyltransferase OS=Methanosarcina barkeri (strain Fusaro / DSM 804) OX=269797 GN=Mbar_A1791 PE=1 SV=1 && PF00590:Tetrapyrrole (Corrin/Porphyrin) Methylases|PF02602:Uroporphyrinogen-III synthase HemD	HEM4	2585	2211	2469	7562	5949	5835	224.778	219.124	240.937	780.454	628.355	717.759
Rv0512	887.528	893.762	933.348	3411.26	2813.04	2402.77	1.66862	2.17e-36	9.86e-35	hemB	NC_000962.3	604602	605591	+	990	protein_coding	delta-aminolevulinic acid dehydratase&&sp|P9WMP4|HEM2_MYCTO Delta-aminolevulinic acid dehydratase OS=Mycobacterium tuberculosis (strain CDC 1551 / Oshkosh) OX=83331 GN=hemB PE=3 SV=1 && PF00490:Delta-aminolevulinic acid dehydratase	-	1044	923	974	3374	2739	2000	155.703	156.894	163.021	597.253	496.199	421.959
Rv0513	622.29	662.333	845.187	1825.95	1470.71	1689.15	1.22768	1.43e-18	2.07e-17	Rv0513	NC_000962.3	605604	606152	+	549	protein_coding	transmembrane protein&&-- && -	-	732	684	882	1806	1432	1406	196.865	209.664	266.205	576.493	467.81	534.919
Rv0514	199.779	225.619	255.856	628.869	517.625	629.526	1.38342	9.72e-20	1.58e-18	Rv0514	NC_000962.3	606149	606448	+	300	protein_coding	transmembrane protein&&-- && -	-	235	233	267	622	504	524	115.658	130.7	147.472	363.344	301.306	364.826
Rv0519c	1283.68	1425.37	1367.44	304.324	454.976	384.443	-1.83377	7.55e-37	3.55e-35	Rv0519c	NC_000962.3	611172	612074	-	903	protein_coding	membrane protein&&-- && PF00756:Putative esterase	-	1510	1472	1427	301	443	320	246.899	274.321	261.852	58.4154	87.9862	74.018
Rv0545c	2554.62	2611.57	2597.85	5557.71	4403.92	5752.23	1.01704	8.14e-18	1.14e-16	pitA	NC_000962.3	636210	637463	-	1254	protein_coding	low-affinity inorganic phosphate transporter&&sp|P9WIA7|PIT_MYCTU Probable low-affinity inorganic phosphate transporter OS=Mycobacterium tuberculosis (strain ATCC 25618 / H37Rv) OX=83332 GN=pit PE=3 SV=1 && PF01384:Phosphate transporter family	-	3005	2697	2711	5497	4288	4788	353.816	361.929	358.222	768.204	613.276	797.502
Rv0551c	547.479	553.881	487.756	1198.09	1108.17	1170.15	1.12904	9.2e-22	1.75e-20	fadD8	NC_000962.3	641096	642811	-	1716	protein_coding	fatty-acid--CoA ligase FadD8&&sp|O06417|FAC8_MYCTU Medium/long-chain-fatty-acid--CoA ligase FadD8 OS=Mycobacterium tuberculosis (strain ATCC 25618 / H37Rv) OX=83332 GN=fadD8 PE=1 SV=1 && PF13193:AMP-binding enzyme C-terminal domain|PF00501:AMP-binding enzyme	AMP-binding	644	572	509	1185	1079	974	55.4114	56.0943	49.1497	121.018	112.772	118.554
Rv0557	3907.16	3766.78	3959.54	2055.45	2202.99	1368.38	-1.04713	2.22e-12	2.05e-11	mgtA	NC_000962.3	648536	649672	+	1137	protein_coding	GDP-mannose-dependent alpha-mannosyltransferase&&sp|P9WMY4|MGTA_MYCTO GDP-mannose-dependent alpha-mannosyltransferase OS=Mycobacterium tuberculosis (strain CDC 1551 / Oshkosh) OX=83331 GN=mgtA PE=3 SV=1 && PF00534:Glycosyl transferases group 1|PF13439:Glycosyltransferase Family 4	Glycos_transf_1	4596	3890	4132	2033	2145	1139	596.829	575.743	602.172	313.347	338.35	209.237
Rv0575c	63.7592	92.959	65.1618	327.578	339.948	440.909	2.32218	7.26e-31	2.51e-29	Rv0575c	NC_000962.3	668579	669745	-	1167	protein_coding	oxidoreductase&&sp|P9WM50|Y1260_MYCTO Uncharacterized protein MT1298 OS=Mycobacterium tuberculosis (strain CDC 1551 / Oshkosh) OX=83331 GN=MT1298 PE=4 SV=1 && PF01494:FAD binding domain	FAD_binding_3	75	96	68	324	331	367	9.48901	13.8433	9.65514	48.6545	50.8693	65.6857
Rv0586	1021.85	938.305	1014.8	3177.71	2389.91	4184.43	1.71234	3.68e-26	9.18e-25	mce2R	NC_000962.3	684410	685132	+	723	protein_coding	HTH-type transcriptional regulator Mce2R&&sp|P9WMG4|MCE2R_MYCTO HTH-type transcriptional regulator Mce2R OS=Mycobacterium tuberculosis (strain CDC 1551 / Oshkosh) OX=83331 GN=mce2R PE=3 SV=1 && PF07729:FCD domain|PF00392:Bacterial regulatory proteins, gntR family	GntR	1202	969	1059	3143	2327	3483	245.469	225.541	242.705	761.824	577.241	1006.21
Rv0587	1127.26	959.608	1013.84	2860.24	2570.66	3039.51	1.4491	3.89e-36	1.73e-34	yrbE2A	NC_000962.3	685129	685926	+	798	protein_coding	hypothetical protein&&-- && PF02405:Permease MlaE	-	1326	991	1058	2829	2503	2530	245.341	208.983	219.686	621.267	562.544	662.206
Rv0588	768.511	679.763	675.575	1373	1386.5	1498.13	1.00232	2.9e-18	4.12e-17	Rv0588	NC_000962.3	685928	686815	+	888	protein_coding	hypothetical protein&&sp|Q1RGU3|Y1340_RICBR Probable ABC transporter permease protein RBE_1340 OS=Rickettsia bellii (strain RML369-C) OX=336407 GN=RBE_1340 PE=3 SV=1 && PF02405:Permease MlaE	-	904	702	705	1358	1350	1247	150.309	133.034	131.552	268	272.659	293.311
Rv0616A	146.221	128.787	137.99	357.91	398.489	374.832	1.4524	4.97e-20	8.32e-19	vapB29	NC_000962.3	710782	711009	+	228	protein_coding	antitoxin VapB29&&sp|P9WJ36|VPB29_MYCTO Putative antitoxin VapB29 OS=Mycobacterium tuberculosis (strain CDC 1551 / Oshkosh) OX=83331 GN=vapB29 PE=4 SV=1 && -	-	172	133	144	354	388	312	111.384	98.1649	104.652	272.093	305.208	285.822
Rv0617	304.344	275.972	271.188	1010.03	964.384	1221.81	1.9064	1.26e-43	7.25e-42	vapC29	NC_000962.3	711006	711407	+	402	protein_coding	ribonuclease VapC29&&sp|P9WF78|VPC29_MYCTO Ribonuclease VapC29 OS=Mycobacterium tuberculosis (strain CDC 1551 / Oshkosh) OX=83331 GN=vapC29 PE=3 SV=1 && PF01850:PIN domain	-	358	285	283	999	939	1017	131.488	119.305	116.649	435.5	418.927	528.409
Rv0654	264.388	266.289	252.981	730.985	689.14	1278.27	1.7822	1.11e-19	1.79e-18	Rv0654	NC_000962.3	750000	751505	+	1506	protein_coding	carotenoid cleavage oxygenase&&sp|P9WPR4|CCO_MYCTO Carotenoid cleavage oxygenase OS=Mycobacterium tuberculosis (strain CDC 1551 / Oshkosh) OX=83331 GN=MT0683 PE=3 SV=1 && PF03055:Retinal pigment epithelial membrane protein	RPE65	311	275	264	723	671	1064	30.4906	30.7289	29.0469	84.1321	79.9091	147.568
Rv0666	164.924	212.063	242.44	77.8504	69.8383	84.097	-1.41878	4.28e-11	3.49e-10	Rv0666	NC_000962.3	759136	759309	+	174	protein_coding	membrane protein&&-- && -	-	194	219	253	77	68	70	164.62	211.804	240.93	77.5514	70.0904	84.028
Rv0676c	680.098	751.418	867.227	4228.19	6047.17	7610.78	2.96007	1.97e-67	3.14e-65	mmpL5	NC_000962.3	775586	778480	-	2895	protein_coding	transmembrane transport protein MmpL5&&sp|P9WJV1|MMPL5_MYCTU Siderophore exporter MmpL5 OS=Mycobacterium tuberculosis (strain ATCC 25618 / H37Rv) OX=83332 GN=mmpL5 PE=1 SV=1 && PF03176:MMPL family	-	800	776	905	4182	5888	6335	40.8011	45.1079	51.7989	253.153	364.769	457.06
Rv0677c	152.172	163.647	180.153	986.779	1722.34	2097.62	3.27684	6.22e-57	6.27e-55	mmpS5	NC_000962.3	778477	778905	-	429	protein_coding	membrane protein MmpS5&&sp|P65381|MMPS5_MYCBO Probable transport accessory protein MmpS5 OS=Mycobacterium bovis (strain ATCC BAA-935 / AF2122/97) OX=233413 GN=mmpS5 PE=3 SV=1 && PF05423:Mycobacterium membrane protein	-	179	169	188	976	1677	1746	61.6064	66.2932	72.6141	398.695	701.091	850.085
Rv0678	155.572	155.9	206.985	937.238	1626.82	2066.38	3.15892	1.09e-18	1.6e-17	Rv0678	NC_000962.3	778990	779487	+	498	protein_coding	hypothetical protein&&sp|I6Y8F7|MMPR5_MYCTU HTH-type transcriptional regulator MmpR5 OS=Mycobacterium tuberculosis (strain ATCC 25618 / H37Rv) OX=83332 GN=mmpR5 PE=1 SV=1 && -	-	183	161	216	927	1584	1720	54.2565	54.4047	71.8695	326.211	570.459	721.397
Rv0693	1222.48	998.341	1195.91	1726.86	2377.58	2746.37	1.00296	9.42e-11	7.41e-10	Rv0693	NC_000962.3	792157	793332	+	1176	protein_coding	mycofactocin radical SAM maturase MftC&&sp|P9WJ78|MFTC_MYCTO Mycofactocin maturase MftC OS=Mycobacterium tuberculosis (strain CDC 1551 / Oshkosh) OX=83331 GN=mftC PE=3 SV=1 && PF04055:Radical SAM superfamily	Radical_SAM	1438	1031	1248	1708	2315	2286	180.544	147.534	175.844	254.524	353.055	406.017
Rv0695	363.852	298.243	318.143	653.134	789.789	672.776	1.10897	3.71e-15	4.2e-14	Rv0695	NC_000962.3	794715	795470	+	756	protein_coding	mycofactocin system creatinine amidohydrolase family protein MftE&&sp|P9WP58|MFTE_MYCTO Mycofactocin precursor peptide peptidase OS=Mycobacterium tuberculosis (strain CDC 1551 / Oshkosh) OX=83331 GN=mftE PE=3 SV=1 && PF02633:Creatinine amidohydrolase	-	428	308	332	646	769	560	83.5896	68.5596	72.7674	149.747	182.433	154.718
Rv0711	909.631	942.178	852.854	3678.18	4111.22	5240.44	2.26794	5.99e-64	8.25e-62	atsA	NC_000962.3	806335	808698	+	2364	protein_coding	arylsulfatase AtsA&&sp|P51691|ARS_PSEAE Arylsulfatase OS=Pseudomonas aeruginosa (strain ATCC 15692 / DSM 22644 / CIP 104116 / JCM 14847 / LMG 12228 / 1C / PRS 101 / PAO1) OX=208964 GN=atsA PE=1 SV=3 && PF00884:Sulfatase	Sulfatase	1070	973	890	3638	4003	4362	66.8293	69.2636	62.3825	269.689	303.694	385.402
Rv0712	429.312	400.886	391.929	853.321	805.194	1034.39	1.13811	4.56e-17	5.96e-16	Rv0712	NC_000962.3	808746	809645	+	900	protein_coding	hypothetical protein&&sp|I6Y8I5|FGE_MYCTU Formylglycine-generating enzyme OS=Mycobacterium tuberculosis (strain ATCC 25618 / H37Rv) OX=83332 GN=Rv0712 PE=1 SV=1 && PF03781:Sulfatase-modifying factor enzyme 1	DUF323	505	414	409	844	784	861	82.8475	77.4101	75.3011	164.342	156.233	199.819
Rv0743c	149.622	130.724	124.574	298.258	210.542	324.374	1.03761	9.71e-08	5.23e-07	Rv0743c	NC_000962.3	833886	834443	-	558	protein_coding	hypothetical protein&&-- && -	-	176	135	130	295	205	270	46.5703	40.7136	38.6038	92.648	65.8898	101.066
Rv0744c	133.469	125.882	126.491	293.203	308.11	301.548	1.22565	7.11e-14	7.35e-13	Rv0744c	NC_000962.3	834440	834946	-	507	protein_coding	transcriptional regulator&&-- && PF12728:Helix-turn-helix domain	-	157	130	132	290	300	251	45.7217	43.1494	43.1406	100.239	106.124	103.405
Rv0747	244.835	200.443	236.691	577.306	675.788	611.505	1.44993	1.06e-23	2.28e-22	PE_PGRS10	NC_000962.3	838451	840856	+	2406	protein_coding	PE-PGRS family protein PE_PGRS10&&sp|P9WIG0|PG10_MYCTO Uncharacterized PE-PGRS family protein PE_PGRS10 OS=Mycobacterium tuberculosis (strain CDC 1551 / Oshkosh) OX=83331 GN=PE_PGRS10 PE=3 SV=1 && PF00934:PE family	-	288	207	247	571	658	509	17.6737	14.4782	17.0107	41.59	49.0489	44.1873
Rv0767c	195.528	183.981	168.654	280.059	388.219	636.734	1.24824	4.57e-08	2.58e-07	Rv0767c	NC_000962.3	860069	860710	-	642	protein_coding	HTH-type transcriptional regulator&&sp|P9WMD6|Y767_MYCTO Uncharacterized HTH-type transcriptional regulator MT0791 OS=Mycobacterium tuberculosis (strain CDC 1551 / Oshkosh) OX=83331 GN=MT0791 PE=4 SV=1 && PF00440:Bacterial regulatory proteins, tetR family	TetR_N	230	190	176	277	378	530	52.896	49.8033	45.4253	75.6124	105.598	172.431
Rv0768	445.464	421.22	420.677	731.996	840.113	1557	1.28078	0.000189287	0.000604724	aldA	NC_000962.3	860912	862381	+	1470	protein_coding	aldehyde dehydrogenase AldA&&sp|H8ZPX2|SAPD_PSESP 3-succinoylsemialdehyde-pyridine dehydrogenase OS=Pseudomonas sp. OX=306 GN=ald PE=1 SV=1 && PF00171:Aldehyde dehydrogenase family	Aldedh	524	435	439	724	818	1296	52.6313	49.798	49.4843	86.3117	99.801	184.146
Rv0784	7407.12	6503.26	7101.68	1876.5	2111.58	1074.04	-2.05262	7.29e-31	2.51e-29	Rv0784	NC_000962.3	878638	879324	+	687	protein_coding	hypothetical protein&&-- && PF10096:Uncharacterized protein conserved in bacteria (DUF2334)	-	8713	6716	7411	1856	2056	894	1872.58	1645.1	1787.48	473.445	536.741	271.804
Rv0785	1954.43	2220.36	2259.58	695.598	714.815	527.408	-1.72936	2.37e-38	1.17e-36	Rv0785	NC_000962.3	879340	881040	+	1701	protein_coding	KsdD-like steroid dehydrogenase&&sp|P71838|Y0785_MYCTU KsdD-like steroid dehydrogenase Rv0785 OS=Mycobacterium tuberculosis (strain ATCC 25618 / H37Rv) OX=83332 GN=Rv0785 PE=1 SV=2 && PF00890:FAD binding domain	-	2299	2293	2358	688	696	439	199.556	226.85	229.699	70.8814	73.3844	53.9058
Rv0790c	122.418	137.502	114.033	1131.36	1503.58	1430.85	3.44285	7.45e-111	2.37e-108	Rv0790c	NC_000962.3	884072	884800	-	729	protein_coding	hypothetical protein&&-- && PF01841:Transglutaminase-like superfamily	Transglut_core	144	142	119	1119	1464	1191	29.1652	32.7794	27.0483	268.999	360.174	341.24
Rv0791c	173.425	150.09	175.362	1649.01	1873.31	2394.36	3.56655	6.75e-117	3.1e-114	Rv0791c	NC_000962.3	884797	885840	-	1044	protein_coding	hypothetical protein&&sp|D8I5S8|FGD_AMYMU F420-dependent glucose-6-phosphate dehydrogenase OS=Amycolatopsis mediterranei (strain U-32) OX=749927 GN=fgd PE=3 SV=1 && PF00296:Luciferase-like monooxygenase	-	204	155	183	1631	1824	1993	28.8509	24.9845	29.045	273.78	313.345	398.733
Rv0792c	156.423	154.932	137.99	1186.97	1404.98	2322.28	3.44975	2.35e-66	3.59e-64	Rv0792c	NC_000962.3	885837	886646	-	810	protein_coding	transcriptional regulator&&sp|P22773|HUTC_PSEPU Histidine utilization repressor OS=Pseudomonas putida OX=303 GN=hutC PE=4 SV=1 && PF07702:UTRA domain|PF00392:Bacterial regulatory proteins, gntR family	UTRA	184	160	144	1174	1368	1933	33.54	33.241	29.4576	253.999	302.9	498.451
Rv0793	42.5061	28.0814	27.7896	303.313	335.84	390.45	3.37594	5.06e-51	4.02e-49	Rv0793	NC_000962.3	886719	887024	+	306	protein_coding	monooxygenase&&sp|O86332|Y0793_MYCTU Putative monooxygenase Rv0793 OS=Mycobacterium tuberculosis (strain ATCC 25618 / H37Rv) OX=83332 GN=Rv0793 PE=1 SV=1 && PF03992:Antibiotic biosynthesis monooxygenase	ABM	50	29	29	300	327	325	24.1256	15.9484	15.7035	171.81	191.657	221.839
Rv0797	17.0024	16.4615	19.1652	3.03313	8.21627	6.00693	-1.61206	0.0104881	0.022594	Rv0797	NC_000962.3	890388	891482	+	1095	protein_coding	insertion sequence element IS1547 transposase&&sp|P19834|YI11_STRCL Insertion element IS116 uncharacterized 44.8 kDa protein OS=Streptomyces clavuligerus OX=1901 PE=3 SV=1 && PF02371:Transposase IS116/IS110/IS902 family|PF01548:Transposase	Transposase_20	20	17	20	3	8	5	2.69678	2.61261	3.02647	0.480126	1.31031	0.953743
Rv0827c	187.877	203.348	357.432	679.422	694.275	1047.61	1.69357	2.42e-06	1.07e-05	kmtR	NC_000962.3	920741	921133	-	393	protein_coding	HTH-type transcriptional regulator KmtR&&sp|O53838|KMTR_MYCTU HTH-type transcriptional regulator KmtR OS=Mycobacterium tuberculosis (strain ATCC 25618 / H37Rv) OX=83332 GN=kmtR PE=1 SV=3 && PF01022:Bacterial regulatory protein, arsR family	HTH_5	221	210	373	672	676	872	83.029	89.9221	157.267	299.658	308.498	463.446
Rv0837c	54.4078	56.1627	63.2453	256.805	329.678	283.527	2.32515	2.64e-31	9.4e-30	Rv0837c	NC_000962.3	933003	934031	-	1029	protein_coding	hypothetical protein&&-- && PF09952:Transcriptional regulator, AbiEi antitoxin, Type IV TA system	-	64	58	66	254	321	236	9.18322	9.48533	10.6279	43.258	55.9485	47.904
Rv0847	188.727	152.995	160.988	863.432	1320.77	1881.37	3.01355	1.79e-46	1.17e-44	lpqS	NC_000962.3	944343	944735	+	393	protein_coding	lipoprotein LpqS&&sp|O53859|LPQS_MYCTU Lipoprotein LpqS OS=Mycobacterium tuberculosis (strain ATCC 25618 / H37Rv) OX=83332 GN=lpqS PE=2 SV=3 && -	-	222	158	168	854	1286	1566	83.4047	67.6557	70.8332	380.815	586.877	832.29
Rv0848	184.477	153.963	177.279	1108.1	1334.12	2031.54	3.11502	1.12e-60	1.3e-58	cysK2	NC_000962.3	944938	946056	+	1119	protein_coding	cysteine synthase CysK&&sp|Q79FV4|CYSK2_MYCTU S-sulfocysteine synthase OS=Mycobacterium tuberculosis (strain ATCC 25618 / H37Rv) OX=83332 GN=cysK2 PE=1 SV=1 && PF00291:Pyridoxal-phosphate dependent enzyme	PALP	217	159	185	1096	1299	1691	28.6325	23.9115	27.3944	171.644	208.199	315.638
Rv0849	158.973	157.837	112.117	567.196	778.491	955.102	2.42084	4.55e-36	2e-34	Rv0849	NC_000962.3	946056	947315	+	1260	protein_coding	MFS-type transporter&&sp|P9WJX4|Y849_MYCTO Putative uncharacterized MFS-type transporter MT0872 OS=Mycobacterium tuberculosis (strain CDC 1551 / Oshkosh) OX=83331 GN=MT0872 PE=5 SV=1 && PF07690:Major Facilitator Superfamily	MFS_1	187	163	117	561	758	795	21.913	21.7699	15.3864	78.0263	107.894	131.787
Rv0869c	820.368	730.115	785.775	1618.68	1409.09	1675.93	1.00885	1.34e-17	1.83e-16	moaA2	NC_000962.3	966265	967347	-	1083	protein_coding	molybdenum cofactor biosynthesis protein MoaA&&sp|P65385|MOAA2_MYCBO GTP 3',8-cyclase 2 OS=Mycobacterium bovis (strain ATCC BAA-935 / AF2122/97) OX=233413 GN=moaA2 PE=3 SV=1 && PF06463:Molybdenum Cofactor Synthesis C|PF04055:Radical SAM superfamily	Radical_SAM	965	754	820	1601	1372	1395	131.562	117.161	125.46	259.067	227.208	269.043
Rv0882	245.685	304.053	268.313	101.104	135.568	109.326	-1.23945	2.91e-11	2.4e-10	Rv0882	NC_000962.3	980225	980509	+	285	protein_coding	transmembrane protein&&sp|P9WKQ8|Y882_MYCTO Uncharacterized protein MT0905 OS=Mycobacterium tuberculosis (strain CDC 1551 / Oshkosh) OX=83331 GN=MT0905 PE=3 SV=1 && PF10801:Protein of unknown function (DUF2537)	-	289	314	280	100	132	91	149.721	185.406	162.792	61.4899	83.0669	66.6917
Rv0885	860.324	690.414	655.451	2090.84	1881.53	2521.71	1.55627	5.25e-28	1.52e-26	Rv0885	NC_000962.3	982762	983784	+	1023	protein_coding	hypothetical protein&&sp|P9WKQ5|Y885_MYCTU Uncharacterized protein Rv0885 OS=Mycobacterium tuberculosis (strain ATCC 25618 / H37Rv) OX=83332 GN=Rv0885 PE=1 SV=1 && PF11583:P-aminobenzoate N-oxygenase AurF	-	1012	713	684	2068	1832	2099	146.061	117.288	110.79	354.261	321.18	428.561
Rv0886	445.464	411.537	444.634	1274.93	1094.82	1428.45	1.54399	9.92e-32	3.63e-30	fprB	NC_000962.3	983803	985530	+	1728	protein_coding	ferredoxin/ferredoxin--NADP reductase&&sp|P65529|FPRB_MYCBO Probable ferredoxin/ferredoxin--NADP reductase OS=Mycobacterium bovis (strain ATCC BAA-935 / AF2122/97) OX=233413 GN=fprB PE=3 SV=1 && PF00037:4Fe-4S binding domain|PF07992:Pyridine nucleotide-disulphide oxidoreductase	Pyr_redox_2	524	425	464	1261	1066	1189	44.7732	41.389	44.4933	127.885	110.64	143.719
Rv0887c	199.779	248.859	247.232	103.126	123.244	109.326	-1.04982	2.56e-08	1.49e-07	Rv0887c	NC_000962.3	985513	985971	-	459	protein_coding	hypothetical protein&&sp|P9WKQ2|Y887_MYCTO Uncharacterized protein MT0910 OS=Mycobacterium tuberculosis (strain CDC 1551 / Oshkosh) OX=83331 GN=MT0910 PE=4 SV=1 && PF18029:Glyoxalase-like domain	-	235	257	258	102	120	91	75.5937	94.2237	93.1381	38.9436	46.8886	41.4099
Rv0888	1545.52	1692.63	1647.25	282.081	370.759	376.034	-2.2492	8.46e-64	1.09e-61	Rv0888	NC_000962.3	987233	988705	+	1473	protein_coding	hypothetical protein&&sp|P64744|SMASE_MYCBO Sphingomyelinase OS=Mycobacterium bovis (strain ATCC BAA-935 / AF2122/97) OX=233413 GN=BQ2027_MB0912 PE=3 SV=1 && PF17963:Bacterial Ig domain|PF03372:Endonuclease/Exonuclease/phosphatase family	Exo_endo_phos	1818	1748	1719	279	361	313	182.231	199.7	193.372	33.1933	43.9545	44.383
Rv0890c	1533.62	1647.12	1643.42	651.112	699.41	571.86	-1.32589	4.43e-29	1.39e-27	Rv0890c	NC_000962.3	989948	992596	-	2649	protein_coding	HTH-type transcriptional regulator&&sp|P9WMG1|Y890_MYCTU Putative HTH-type transcriptional regulator Rv0890c OS=Mycobacterium tuberculosis (strain ATCC 25618 / H37Rv) OX=83332 GN=Rv0890c PE=1 SV=1 && PF00196:Bacterial regulatory proteins, luxR family	GerE	1804	1701	1715	644	681	476	100.551	108.059	107.276	42.6042	46.1067	37.5319
Rv0891c	580.634	571.31	730.196	336.678	317.353	270.312	-1.0235	1.35e-11	1.15e-10	Rv0891c	NC_000962.3	992598	993455	-	858	protein_coding	hypothetical protein&&sp|P9WMV1|Y891_MYCTU Uncharacterized protein Rv0891c OS=Mycobacterium tuberculosis (strain ATCC 25618 / H37Rv) OX=83332 GN=Rv0891c PE=3 SV=1 && PF00211:Adenylate and Guanylate cyclase catalytic domain	Guanylate_cyc	683	590	762	333	309	225	117.534	115.719	147.159	68.0151	64.5907	54.7735
Rv0892	2078.55	2238.76	2195.38	1105.07	970.547	1154.53	-1.01211	1.25e-19	2e-18	Rv0892	NC_000962.3	993853	995340	+	1488	protein_coding	monooxygenase&&sp|P9WNG0|Y892_MYCTO Uncharacterized monooxygenase MT0916 OS=Mycobacterium tuberculosis (strain CDC 1551 / Oshkosh) OX=83331 GN=MT0916 PE=3 SV=1 && PF00743:Flavin-binding monooxygenase-like	FMO-like	2445	2312	2291	1093	945	961	242.609	261.472	255.119	128.726	113.901	134.895
Rv0924c	949.587	839.536	868.186	372.064	423.138	335.187	-1.23178	2.73e-20	4.66e-19	mntH	NC_000962.3	1030578	1031864	-	1287	protein_coding	divalent metal cation transporter MntH&&sp|O69443|MNTH_MYCBO Divalent metal cation transporter MntH OS=Mycobacterium bovis (strain ATCC BAA-935 / AF2122/97) OX=233413 GN=mntH PE=3 SV=2 && PF01566:Natural resistance-associated macrophage protein	-	1117	867	906	368	412	279	128.146	113.365	116.646	50.1092	57.414	45.2794
Rv0925c	2436.45	2460.51	2496.27	774.46	877.087	861.394	-1.5572	3.39e-48	2.5e-46	Rv0925c	NC_000962.3	1031896	1032633	-	738	protein_coding	hypothetical protein&&sp|O69443|MNTH_MYCBO Divalent metal cation transporter MntH OS=Mycobacterium bovis (strain ATCC BAA-935 / AF2122/97) OX=233413 GN=mntH PE=3 SV=2 && PF03358:NADPH-dependent FMN reductase	FMN_red	2866	2541	2605	766	854	717	573.39	579.413	584.887	181.895	207.539	202.926
Rv0926c	1445.21	1364.37	1430.69	693.576	693.248	573.061	-1.11198	1.78e-20	3.07e-19	Rv0926c	NC_000962.3	1032710	1033786	-	1077	protein_coding	hypothetical protein&&-- && -	-	1700	1409	1493	686	675	477	233.058	220.158	229.702	111.624	112.405	92.5077
Rv0928	6317.26	6022	5363.39	3000.78	2978.4	1934.23	-1.16109	1.13e-14	1.23e-13	pstS3	NC_000962.3	1034903	1036015	+	1113	protein_coding	phosphate ABC transporter substrate-binding lipoprotein PstS&&sp|P0A5Y3|PSTS3_MYCBO Phosphate-binding protein PstS 3 OS=Mycobacterium bovis (strain ATCC BAA-935 / AF2122/97) OX=233413 GN=pstS3 PE=3 SV=1 && PF12849:PBP superfamily domain	-	7431	6219	5597	2968	2900	1610	985.785	940.297	833.26	467.323	467.306	302.139
Rv0930	1756.35	1770.09	1742.12	932.183	969.52	675.179	-1.03023	4.58e-14	4.79e-13	pstA1	NC_000962.3	1036999	1037925	+	927	protein_coding	phosphate ABC transporter permease PstA&&sp|P9WG11|PSTA1_MYCTU Phosphate transport system permease protein PstA 1 OS=Mycobacterium tuberculosis (strain ATCC 25618 / H37Rv) OX=83332 GN=pstA1 PE=2 SV=1 && PF00528:Binding-protein-dependent transport system inner membrane component	BPD_transp_1	2066	1828	1818	922	944	562	329.064	331.846	324.963	174.301	182.638	126.629
Rv0953c	96.914	65.8459	88.1601	139.524	223.893	175.402	1.09989	2e-06	8.95e-06	Rv0953c	NC_000962.3	1064114	1064962	-	849	protein_coding	oxidoreductase&&sp|P9WKN4|Y953_MYCTO Uncharacterized protein MT0980 OS=Mycobacterium tuberculosis (strain CDC 1551 / Oshkosh) OX=83331 GN=MT0980 PE=4 SV=1 && PF00296:Luciferase-like monooxygenase	-	114	68	92	138	218	146	19.8257	13.4785	17.9556	28.4852	46.0519	35.9187
Rv0959A	53.5577	81.3391	96.7845	152.668	178.704	247.485	1.32238	8.35e-08	4.54e-07	vapB9	NC_000962.3	1073327	1073548	+	222	protein_coding	antitoxin VapB9&&sp|P9WJ54|VAPB9_MYCTO Putative antitoxin VapB9 OS=Mycobacterium tuberculosis (strain CDC 1551 / Oshkosh) OX=83331 GN=vapB9 PE=3 SV=1 && -	-	63	84	101	151	174	206	41.9004	63.6746	75.3857	119.199	140.571	193.816
Rv0960	206.58	177.203	176.32	495.412	657.301	956.303	1.91008	1.24e-21	2.3e-20	vapC9	NC_000962.3	1073545	1073928	+	384	protein_coding	ribonuclease VapC9&&sp|P64774|VAPC3_MYCBO VapC ribonuclease Mb0985 OS=Mycobacterium bovis (strain ATCC BAA-935 / AF2122/97) OX=233413 GN=BQ2027_MB0985 PE=3 SV=1 && PF01850:PIN domain	-	243	183	184	490	640	796	93.4341	80.1973	79.3975	223.621	298.915	432.969
Rv0967	233.784	213.999	173.445	802.769	1061.95	1323.93	2.35745	5.14e-40	2.69e-38	csoR	NC_000962.3	1077975	1078334	+	360	protein_coding	copper-sensing transcriptional repressor CsoR&&sp|Q7U0Y5|CSOR_MYCBO Copper-sensing transcriptional repressor CsoR OS=Mycobacterium bovis (strain ATCC BAA-935 / AF2122/97) OX=233413 GN=csoR PE=3 SV=1 && PF02583:Metal-sensitive transcriptional repressor	-	275	221	181	794	1034	1102	112.787	103.307	83.3099	386.515	515.13	639.373
Rv0968	221.882	177.203	209.859	1186.97	1180.06	1764.84	2.76025	5.31e-60	5.78e-58	Rv0968	NC_000962.3	1078391	1078687	+	297	protein_coding	hypothetical protein&&sp|P9WKL8|Y968_MYCTO Uncharacterized protein MT0996 OS=Mycobacterium tuberculosis (strain CDC 1551 / Oshkosh) OX=83331 GN=MT0996 PE=4 SV=1 && PF07371:Protein of unknown function (DUF1490)	-	261	183	219	1174	1149	1469	129.752	103.689	122.182	692.724	693.845	1033.1
Rv0969	1180.82	1071.93	1122.13	7067.2	6355.28	7782.58	2.65109	2.17e-125	1.49e-122	ctpV	NC_000962.3	1078743	1081055	+	2313	protein_coding	copper-exporting ATPase&&sp|P9WPS2|CTPV_MYCTO Probable copper-exporting P-type ATPase V OS=Mycobacterium tuberculosis (strain CDC 1551 / Oshkosh) OX=83331 GN=ctpV PE=3 SV=1 && PF00122:E1-E2 ATPase|PF00702:haloacid dehalogenase-like hydrolase	E1-E2_ATPase	1389	1107	1171	6990	6188	6478	88.666	80.54	83.8884	529.602	479.815	584.98
Rv0970	374.054	351.501	327.726	970.602	1034.22	1340.75	1.66565	3.06e-30	1.02e-28	Rv0970	NC_000962.3	1081052	1081684	+	633	protein_coding	integral membrane protein&&sp|P9WKL6|Y970_MYCTO Uncharacterized protein MT0998 OS=Mycobacterium tuberculosis (strain CDC 1551 / Oshkosh) OX=83331 GN=MT0998 PE=4 SV=1 && PF17197:Domain of unknown function (DUF5134)	-	440	363	342	960	1007	1116	102.631	96.5034	89.5247	265.776	285.315	368.244
Rv0972c	929.184	940.241	928.556	562.14	409.786	368.825	-1.05919	2.67e-12	2.45e-11	fadE12	NC_000962.3	1082584	1083750	-	1167	protein_coding	acyl-CoA dehydrogenase fadE12&&sp|P9WQG2|ACDC_MYCTO Acyl-CoA dehydrogenase fadE12 OS=Mycobacterium tuberculosis (strain CDC 1551 / Oshkosh) OX=83331 GN=fadE12 PE=3 SV=1 && PF02771:Acyl-CoA dehydrogenase, N-terminal domain|PF00441:Acyl-CoA dehydrogenase, C-terminal domain|PF02770:Acyl-CoA dehydrogenase, middle domain	-	1093	971	969	556	399	307	138.286	140.019	137.586	83.4934	61.3198	54.9469
Rv0990c	240.585	239.176	206.026	350.832	404.651	624.721	1.00607	2.58e-07	1.31e-06	Rv0990c	NC_000962.3	1107443	1108099	-	657	protein_coding	hypothetical protein&&-- && PF08666:SAF domain	-	283	247	215	347	394	520	63.5992	63.2661	54.2242	92.5577	107.555	165.315
Rv0991c	591.685	620.695	591.248	1254.71	1223.2	1924.62	1.2865	1.31e-15	1.55e-14	Rv0991c	NC_000962.3	1108172	1108504	-	333	protein_coding	hypothetical protein&&-- && PF09723:Zinc ribbon domain	-	696	641	617	1241	1191	1602	308.6	323.932	307.016	653.094	641.455	1004.83
Rv0996	1499.62	1516.39	1533.22	614.715	934.601	593.485	-1.08509	3.66e-12	3.31e-11	Rv0996	NC_000962.3	1112384	1113460	+	1077	protein_coding	transmembrane protein&&-- && -	-	1764	1566	1600	608	910	494	241.832	244.69	246.164	98.9319	151.539	95.8047
Rv0997	2234.12	2326.88	2112.97	721.885	859.627	932.275	-1.40981	4.15e-31	1.47e-29	Rv0997	NC_000962.3	1114293	1114724	+	432	protein_coding	hypothetical protein&&-- && PF13649:Methyltransferase domain	-	2628	2403	2205	714	837	776	898.198	936.073	845.756	289.643	347.489	375.192
Rv0997a	2768.85	3056.99	3026.19	1129.34	1452.23	1397.21	-1.15397	1.13e-21	2.13e-20	Rv0997a	NC_000962.3	1113861	1114112	+	252	protein_coding	hypothetical protein&&-- && -	-	3257	3157	3158	1117	1414	1163	1908.3	2108.21	2076.5	776.785	1006.35	963.95
Rv1000c	328.997	321.483	344.016	890.73	1098.93	1713.18	1.89548	9.19e-24	1.98e-22	Rv1000c	NC_000962.3	1116531	1117148	-	618	protein_coding	hypothetical protein&&sp|Q6NS38|ALKB2_HUMAN DNA oxidative demethylase ALKBH2 OS=Homo sapiens OX=9606 GN=ALKBH2 PE=1 SV=1 && PF13532:2OG-Fe(II) oxygenase superfamily	-	387	332	359	881	1070	1426	92.4598	90.4043	96.2557	249.825	310.523	481.955
Rv1004c	964.889	726.242	990.843	2029.17	1542.6	1921.02	1.03376	1.12e-12	1.06e-11	Rv1004c	NC_000962.3	1120889	1122148	-	1260	protein_coding	membrane protein&&-- && -	-	1135	750	1034	2007	1502	1599	133.001	100.168	135.979	279.142	213.795	265.066
Rv1027c	178.526	194.633	189.736	73.8062	110.92	75.6873	-1.10859	1.61e-07	8.45e-07	kdpE	NC_000962.3	1148427	1149107	-	681	protein_coding	transcriptional regulator KdpE&&sp|P9WGN0|KDPE_MYCTO Transcriptional regulatory protein KdpE OS=Mycobacterium tuberculosis (strain CDC 1551 / Oshkosh) OX=83331 GN=kdpE PE=3 SV=1 && PF00486:Transcriptional regulatory protein, C terminal|PF00072:Response regulator receiver domain	Response_reg	210	201	198	73	108	63	45.5305	49.6694	48.1769	18.7856	28.443	19.3227
Rv1030	593.385	634.251	637.244	290.17	308.11	258.298	-1.12017	1.66e-16	2.12e-15	kdpB	NC_000962.3	1153724	1155853	+	2130	protein_coding	potassium-transporting ATPase subunit B&&sp|P63682|KDPB_MYCBO Potassium-transporting ATPase ATP-binding subunit OS=Mycobacterium bovis (strain ATCC BAA-935 / AF2122/97) OX=233413 GN=kdpB PE=3 SV=1 && PF00702:haloacid dehalogenase-like hydrolase|PF00122:E1-E2 ATPase	E1-E2_ATPase	698	655	665	287	300	215	48.3845	51.7489	51.7324	23.613	25.2604	21.0831
Rv1031	262.688	244.017	222.317	105.149	127.352	129.75	-1.01203	2.67e-08	1.55e-07	kdpC	NC_000962.3	1155853	1156422	+	570	protein_coding	potassium-transporting ATPase subunit C&&sp|P65212|KDPC_MYCBO Potassium-transporting ATPase KdpC subunit OS=Mycobacterium bovis (strain ATCC BAA-935 / AF2122/97) OX=233413 GN=kdpC PE=3 SV=1 && PF02669:K+-transporting ATPase, c chain	-	309	252	232	104	124	108	80.0413	74.3987	67.4425	31.9747	39.0163	39.5753
Rv1037c	102.865	102.642	102.534	25.2761	59.5679	51.6596	-1.17899	4.52e-05	0.000161221	esxI	NC_000962.3	1160544	1160828	-	285	protein_coding	ESAT-6 like protein EsxI&&sp|P0DOA6|ESXI_MYCTU ESAT-6-like protein EsxI OS=Mycobacterium tuberculosis (strain ATCC 25618 / H37Rv) OX=83332 GN=esxI PE=2 SV=1 && PF06013:Proteins of 100 residues with WXG	-	121	106	107	25	58	43	62.686	62.5894	62.2099	15.3725	36.4991	31.5137
Rv1038c	8.50122	9.68323	13.4157	38.4197	55.4598	42.0485	2.11164	8.22e-07	3.86e-06	esxJ	NC_000962.3	1160855	1161151	-	297	protein_coding	ESAT-6 like protein EsxJ&&sp|P0DOB0|ESXJ_MYCBO ESAT-6-like protein EsxJ OS=Mycobacterium bovis (strain ATCC BAA-935 / AF2122/97) OX=233413 GN=esxJ PE=3 SV=1 && PF06013:Proteins of 100 residues with WXG	-	10	10	14	38	54	35	4.97134	5.66609	7.81074	22.4221	32.6089	24.6143
Rv1039c	195.528	203.348	217.526	1890.65	1999.63	2454.43	3.36381	7.91e-132	6.54e-129	PPE15	NC_000962.3	1161297	1162472	-	1176	protein_coding	PPE family protein PPE15&&sp|P9WI30|PPE15_MYCTO PPE family protein PPE15 OS=Mycobacterium tuberculosis (strain CDC 1551 / Oshkosh) OX=83331 GN=PPE15 PE=3 SV=1 && PF00823:PPE family|PF12484:Polymorphic PE/PPE proteins C terminal	-	230	210	227	1870	1947	2043	28.8769	30.0505	31.9845	278.665	296.932	362.858
Rv1040c	185.327	210.126	241.482	2641.86	2506.99	4636.15	3.9416	1.07e-34	4.58e-33	PE8	NC_000962.3	1162549	1163376	-	828	protein_coding	PE family protein PE8&&sp|Q79FP3|PG26_MYCTU PE-PGRS family protein PE_PGRS26 OS=Mycobacterium tuberculosis (strain ATCC 25618 / H37Rv) OX=83332 GN=PE_PGRS26 PE=2 SV=1 && PF00934:PE family|PF12484:Polymorphic PE/PPE proteins C terminal	-	218	217	252	2613	2441	3859	38.8738	44.1031	50.4302	553.041	528.733	973.464
Rv1050	214.231	260.479	223.275	99.0823	133.514	72.0831	-1.18893	3.45e-08	1.97e-07	Rv1050	NC_000962.3	1172881	1173786	+	906	protein_coding	oxidoreductase&&sp|A7AZH2|3BHDP_RUMGV 3beta-hydroxysteroid dehydrogenase OS=Ruminococcus gnavus (strain ATCC 29149 / VPI C7-9) OX=411470 GN=RUMGNA_00694 PE=1 SV=1 && PF00106:short chain dehydrogenase	adh_short	252	269	233	98	130	60	41.0679	49.9647	42.6136	18.956	25.7344	13.8324
Rv1059	1472.41	1387.61	1348.28	543.942	688.112	505.783	-1.2748	1.18e-21	2.21e-20	Rv1059	NC_000962.3	1182391	1183455	+	1065	protein_coding	hypothetical protein&&-- && PF01113:Dihydrodipicolinate reductase, N-terminus	DapB_N	1732	1433	1407	538	670	421	240.12	226.431	218.91	88.5281	112.83	82.5673
Rv1076	489.671	342.786	387.138	127.392	159.19	118.937	-1.58732	9.95e-18	1.38e-16	lipU	NC_000962.3	1200767	1201660	+	894	protein_coding	lipase LipU&&sp|O53424|LIPU_MYCTU Esterase LipU OS=Mycobacterium tuberculosis (strain ATCC 25618 / H37Rv) OX=83332 GN=lipU PE=1 SV=3 && PF07859:alpha/beta hydrolase fold	Abhydrolase_3	576	354	404	126	155	99	95.1295	66.6355	74.8797	24.6991	31.0952	23.1299
Rv1094	12135.5	10232.3	11460.8	24403.6	18945.7	27925	1.07506	2.28e-15	2.62e-14	desA2	NC_000962.3	1221959	1222786	+	828	protein_coding	acyl-ACP desaturase DesA&&sp|P9WNZ4|DESA2_MYCTO Putative acyl-[acyl-carrier-protein] desaturase DesA2 OS=Mycobacterium tuberculosis (strain CDC 1551 / Oshkosh) OX=83331 GN=desA2 PE=3 SV=1 && PF03405:Fatty acid desaturase	-	14275	10567	11960	24137	18447	23244	2545.52	2147.64	2393.43	5108.59	3995.71	5863.49
Rv1113	85.0122	90.054	78.5775	46.508	49.2976	27.6319	-1.0289	0.000314504	0.000952498	vapB32	NC_000962.3	1239416	1239613	+	198	protein_coding	antitoxin VapB32&&sp|P9WJ32|VPB32_MYCTO Antitoxin VapB32 OS=Mycobacterium tuberculosis (strain CDC 1551 / Oshkosh) OX=83331 GN=vapB32 PE=3 SV=1 && PF09957:Bacterial antitoxin of type II TA system, VapB	-	100	93	82	46	48	23	74.5702	79.0419	68.6229	40.7137	43.4785	24.2626
Rv1129c	560.231	708.812	528.961	1170.79	1327.95	1864.55	1.2785	3.01e-14	3.19e-13	Rv1129c	NC_000962.3	1253074	1254534	-	1461	protein_coding	transcriptional regulator&&sp|O06581|PRPR_MYCTU HTH-type transcriptional regulator PrpR OS=Mycobacterium tuberculosis (strain ATCC 25618 / H37Rv) OX=83332 GN=prpR PE=1 SV=1 && PF01381:Helix-turn-helix|PF09856:Predicted transcriptional regulator (DUF2083)|PF06114:IrrE N-terminal-like domain	DUF955	659	732	552	1158	1293	1552	66.5987	84.3142	62.605	138.901	158.726	221.879
Rv1131	2348.89	3327.16	2665.89	4765.05	4668.89	8460.16	1.101	0.00107113	0.00289605	prpC	NC_000962.3	1256132	1257313	+	1182	protein_coding	methylcitrate synthase PrpC&&sp|H8F0D7|PRPC_MYCTE 2-methylcitrate synthase OS=Mycobacterium tuberculosis (strain ATCC 35801 / TMC 107 / Erdman) OX=652616 GN=gltA1 PE=1 SV=1 && PF00285:Citrate synthase, C-terminal domain	Citrate_synt	2763	3436	2782	4713	4546	7042	345.139	489.187	389.996	698.761	689.78	1244.38
Rv1148c	282.241	254.669	250.106	131.436	124.271	112.93	-1.09263	4.03e-10	2.96e-09	Rv1148c	NC_000962.3	1276300	1277748	-	1449	protein_coding	hypothetical protein&&sp|P9WM55|Y1148_MYCTU Uncharacterized protein Rv1148c OS=Mycobacterium tuberculosis (strain ATCC 25618 / H37Rv) OX=83332 GN=Rv1148c PE=1 SV=1 && PF02720:Domain of unknown function (DUF222)	DUF222	332	263	261	130	121	94	33.8298	30.5441	29.8464	15.7226	14.9767	13.5499
Rv1158c	852.673	790.151	715.822	180.977	295.786	199.43	-1.8012	8.85e-26	2.14e-24	Rv1158c	NC_000962.3	1284179	1284862	-	684	protein_coding	hypothetical protein&&-- && -	-	1003	816	747	179	288	166	216.509	200.758	180.961	45.8612	75.5153	50.6906
Rv1161	2030.09	1961.82	2522.15	6631.44	5310.79	5246.45	1.40005	2.08e-26	5.3e-25	narG	NC_000962.3	1287328	1291026	+	3699	protein_coding	nitrate reductase subunit alpha&&sp|P9WJQ2|NARG_MYCTO Nitrate reductase alpha subunit OS=Mycobacterium tuberculosis (strain CDC 1551 / Oshkosh) OX=83331 GN=narG PE=3 SV=1 && PF00384:Molybdopterin oxidoreductase|PF01568:Molydopterin dinucleotide binding domain	-	2388	2026	2632	6559	5171	4367	95.3192	92.1711	117.902	310.743	250.72	246.589
Rv1168c	291.592	265.32	287.479	697.62	802.113	1486.11	1.82054	1.27e-17	1.74e-16	PPE17	NC_000962.3	1298764	1299804	-	1041	protein_coding	PPE family protein PPE17&&sp|P9WI26|PPE17_MYCTO PPE family protein PPE17 OS=Mycobacterium tuberculosis (strain CDC 1551 / Oshkosh) OX=83331 GN=PPE17 PE=3 SV=1 && PF12484:Polymorphic PE/PPE proteins C terminal|PF00823:PPE family	-	343	274	300	690	781	1237	48.649	44.2934	47.7519	116.157	134.555	248.196
Rv1169c	52.7076	65.8459	35.4557	318.479	363.57	712.422	3.17789	1.55e-12	1.45e-11	lipX	NC_000962.3	1299822	1300124	-	303	protein_coding	lipase LipX&&sp|Q79FR5|PE11_MYCTU Esterase PE11 OS=Mycobacterium tuberculosis (strain ATCC 25618 / H37Rv) OX=83332 GN=PE11 PE=1 SV=1 && PF00934:PE family	-	62	68	37	315	354	593	30.212	37.7664	20.2339	182.187	209.536	408.778
Rv1175c	1618.63	1341.13	1452.73	3627.63	3189.97	4953.31	1.41497	3.57e-21	6.48e-20	fadH	NC_000962.3	1306202	1308226	-	2025	protein_coding	NADPH dependent 2%2C4-dienoyl-CoA reductase FadH&&sp|P42593|FADH_ECOLI 2,4-dienoyl-CoA reductase [(2E)-enoyl-CoA-producing] OS=Escherichia coli (strain K12) OX=83333 GN=fadH PE=1 SV=3 && PF07992:Pyridine nucleotide-disulphide oxidoreductase|PF00724:NADH:flavin oxidoreductase / NADH oxidase family	Oxidored_FMN	1904	1385	1516	3588	3106	4123	138.826	115.097	124.049	310.51	275.09	425.269
Rv1176c	195.528	206.253	197.402	496.423	450.868	867.4	1.59673	1.19e-14	1.28e-13	Rv1176c	NC_000962.3	1308223	1308792	-	570	protein_coding	hypothetical protein&&-- && PF03551:Transcriptional regulator PadR-like family|PF10400:Virulence activator alpha C-term	PadR	230	213	206	491	439	722	59.5776	62.8846	59.8843	150.958	138.13	264.568
Rv1180	1102.61	924.748	817.398	296.236	330.705	324.374	-1.58144	4.4e-28	1.3e-26	pks3	NC_000962.3	1313725	1315191	+	1467	protein_coding	polyketide beta-ketoacyl synthase&&sp|A0A089QRB9|MSL3_MYCTU Mycolipanoate synthase OS=Mycobacterium tuberculosis (strain ATCC 25618 / H37Rv) OX=83332 GN=msl3 PE=1 SV=2 && PF02801:Beta-ketoacyl synthase, C-terminal domain|PF16197:Ketoacyl-synthetase C-terminal extension|PF00109:Beta-ketoacyl synthase, N-terminal domain	ketoacyl-synt	1297	955	853	293	322	270	130.539	109.55	96.3473	35.0014	39.3663	38.4423
Rv1181	5094.78	4519.16	4429.09	1194.04	1382.39	1224.21	-1.88546	1.72e-64	2.45e-62	pks4	NC_000962.3	1315234	1319982	+	4749	protein_coding	polyketide beta-ketoacyl synthase&&sp|A0A089QRB9|MSL3_MYCTU Mycolipanoate synthase OS=Mycobacterium tuberculosis (strain ATCC 25618 / H37Rv) OX=83332 GN=msl3 PE=1 SV=2 && PF00698:Acyl transferase domain|PF08659:KR domain|PF08240:Alcohol dehydrogenase GroES-like domain|PF00550:Phosphopantetheine attachment site|PF00107:Zinc-binding dehydrogenase|PF14765:Polyketide synthase dehydratase	Acyl_transf_1	5993	4667	4622	1181	1346	1019	186.326	165.377	161.268	43.5809	50.8325	44.8175
Rv1182	3484.65	3240.98	2914.08	436.771	557.679	622.318	-2.57785	2.14e-79	4.43e-77	papA3	NC_000962.3	1320035	1321453	+	1419	protein_coding	acyltransferase papA3&&sp|P9WIK4|PAPA3_MYCTO Acyltransferase PapA3 OS=Mycobacterium tuberculosis (strain CDC 1551 / Oshkosh) OX=83331 GN=papA3 PE=3 SV=1 && PF00668:Condensation domain	-	4099	3347	3041	432	543	518	426.507	396.929	355.103	53.3519	68.6304	76.247
Rv1183	3146.3	2851.71	2467.53	705.709	795.951	636.734	-1.98428	2.85e-53	2.45e-51	mmpL10	NC_000962.3	1321520	1324528	+	3009	protein_coding	transmembrane transport protein MmpL10&&sp|P65373|MMPLA_MYCBO Probable transport protein MmpL10 OS=Mycobacterium bovis (strain ATCC BAA-935 / AF2122/97) OX=233413 GN=mmpL10 PE=3 SV=1 && PF03176:MMPL family	-	3701	2945	2575	698	775	530	181.605	164.703	141.8	40.652	46.1932	36.7899
Rv1184c	757.459	825.011	835.605	227.485	313.245	199.43	-1.70465	1.91e-26	4.9e-25	Rv1184c	NC_000962.3	1324532	1325611	-	1080	protein_coding	hypothetical protein&&sp|O50440|CHP2_MYCTU Diacyltrehalose acyltransferase Chp2 OS=Mycobacterium tuberculosis (strain ATCC 25618 / H37Rv) OX=83332 GN=chp2 PE=1 SV=3 && PF08237:PE-PPE domain	PE-PPE	891	852	872	225	305	166	121.81	132.756	133.787	36.5096	50.6495	32.104
Rv1185c	4278.67	3933.33	3596.36	1680.36	1850.71	1894.59	-1.12235	2.49e-24	5.51e-23	fadD21	NC_000962.3	1325776	1327512	-	1737	protein_coding	fatty-acid--CoA ligase FadD21&&sp|P63524|FAD21_MYCBO Putative fatty-acid--CoA ligase fadD21 OS=Mycobacterium bovis (strain ATCC BAA-935 / AF2122/97) OX=233413 GN=fadD21 PE=3 SV=1 && PF00501:AMP-binding enzyme	AMP-binding	5033	4062	3753	1662	1802	1577	427.816	393.532	358.013	167.679	186.06	189.63
Rv1191	88.4127	90.054	94.868	38.4197	51.3517	19.2222	-1.31256	2e-05	7.67e-05	Rv1191	NC_000962.3	1333931	1334845	+	915	protein_coding	hypothetical protein&&-- && PF00561:alpha/beta hydrolase fold	Abhydrolase_1	104	93	99	38	50	16	16.782	17.1041	17.9281	7.27798	9.80049	3.65237
Rv1226c	226.133	234.334	230.941	523.721	474.489	487.763	1.10438	2.07e-15	2.4e-14	Rv1226c	NC_000962.3	1368832	1370295	-	1464	protein_coding	transmembrane protein&&-- && PF03703:Bacterial PH domain	-	266	242	241	518	462	406	26.8269	27.8172	27.277	62.0065	56.5978	57.9242
Rv1227c	102.015	113.294	92.9514	303.313	212.596	206.638	1.23126	1.67e-09	1.14e-08	Rv1227c	NC_000962.3	1370292	1370825	-	534	protein_coding	transmembrane protein&&-- && PF03703:Bacterial PH domain	-	120	117	97	300	207	172	33.1795	36.8709	30.0989	98.4529	69.5229	67.2764
Rv1251c	1990.14	2353.02	2346.78	464.069	696.329	517.797	-1.99438	1.42e-41	7.6e-40	Rv1251c	NC_000962.3	1395821	1399240	-	3420	protein_coding	hypothetical protein&&sp|P9WG86|Y1250_MYCTO Uncharacterized MFS-type transporter MT1289 OS=Mycobacterium tuberculosis (strain CDC 1551 / Oshkosh) OX=83331 GN=MT1289 PE=3 SV=1 && PF13604:AAA domain|PF13087:AAA domain|PF13482:RNase_H superfamily	-	2341	2430	2449	459	678	431	101.066	119.569	118.654	23.5199	35.5551	26.3225
Rv1265	1195.27	1197.82	1166.21	3361.72	3644.94	4081.11	1.63897	2.92e-50	2.24e-48	Rv1265	NC_000962.3	1413260	1413940	+	681	protein_coding	hypothetical protein&&sp|P9WM48|Y1265_MYCTO Uncharacterized protein MT1303 OS=Mycobacterium tuberculosis (strain CDC 1551 / Oshkosh) OX=83331 GN=MT1303 PE=4 SV=1 && -	-	1406	1237	1217	3325	3549	3397	304.838	305.677	296.117	855.644	934.669	1041.89
Rv1278	1866.87	1873.7	1898.32	874.553	923.303	716.026	-1.16411	5.08e-22	9.77e-21	Rv1278	NC_000962.3	1427414	1430041	+	2628	protein_coding	hypothetical protein&&sp|P9WM40|Y1278_MYCTO Uncharacterized protein MT1315 OS=Mycobacterium tuberculosis (strain CDC 1551 / Oshkosh) OX=83331 GN=MT1315 PE=4 SV=1 && PF13175:AAA ATPase domain	-	2196	1935	1981	865	899	596	123.378	123.907	124.905	57.6819	61.3526	47.3692
Rv1279	2089.6	2172.92	2237.54	533.831	577.193	585.075	-1.93875	4.66e-70	8.02e-68	Rv1279	NC_000962.3	1430062	1431648	+	1587	protein_coding	GMC-type oxidoreductase&&sp|P9WMV4|Y1279_MYCTO Uncharacterized GMC-type oxidoreductase MT1316 OS=Mycobacterium tuberculosis (strain CDC 1551 / Oshkosh) OX=83331 GN=MT1316 PE=3 SV=1 && PF05199:GMC oxidoreductase|PF00732:GMC oxidoreductase	-	2458	2244	2335	528	562	487	228.684	237.95	243.798	58.305	63.5123	64.0955
Rv1285	325.597	386.361	402.47	3781.3	3644.94	5372.6	3.5223	7.78e-117	3.22e-114	cysD	NC_000962.3	1437909	1438907	+	999	protein_coding	sulfate adenylyltransferase subunit 2&&sp|P65671|CYSD_MYCBO Sulfate adenylyltransferase subunit 2 OS=Mycobacterium bovis (strain ATCC BAA-935 / AF2122/97) OX=233413 GN=cysD PE=3 SV=1 && PF01507:Phosphoadenosine phosphosulfate reductase family	-	383	399	420	3740	3549	4472	56.6061	67.212	69.6633	656.077	637.146	935
Rv1286	752.358	829.853	1000.43	5113.86	5239.93	6306.07	2.68986	1.39e-93	3.83e-91	Rv1286	NC_000962.3	1438907	1440751	+	1845	protein_coding	adenylyl-sulfate kinase&&sp|P9WNM4|CYSNC_MYCTO Bifunctional enzyme CysN/CysC OS=Mycobacterium tuberculosis (strain CDC 1551 / Oshkosh) OX=83331 GN=cysNC PE=3 SV=1 && PF01583:Adenylylsulphate kinase|PF00009:Elongation factor Tu GTP binding domain	GTP_EFTU	885	857	1044	5058	5102	5249	70.8235	78.1671	93.7615	480.431	495.956	594.231
Rv1287	542.378	589.709	739.779	1228.42	1186.22	1579.82	1.0934	3.28e-13	3.26e-12	Rv1287	NC_000962.3	1440805	1441290	+	486	protein_coding	HTH-type transcriptional regulator&&sp|P9WME2|Y1287_MYCTO Putative HTH-type transcriptional regulator MT1325 OS=Mycobacterium tuberculosis (strain CDC 1551 / Oshkosh) OX=83331 GN=MT1325 PE=4 SV=1 && PF02082:Transcriptional regulator	Rrf2	638	609	772	1215	1155	1315	193.827	210.873	263.209	438.115	426.23	565.151
Rv1353c	284.791	324.388	275.98	148.623	145.839	140.562	-1.02356	8.21e-10	5.78e-09	Rv1353c	NC_000962.3	1519200	1519985	-	786	protein_coding	HTH-type transcriptional regulator&&sp|P9WMD2|CHLER_MYCTO HTH-type transcriptional repressor MT1396 OS=Mycobacterium tuberculosis (strain CDC 1551 / Oshkosh) OX=83331 GN=MT1396 PE=3 SV=1 && PF00440:Bacterial regulatory proteins, tetR family|PF02909:Tetracyclin repressor-like, C-terminal domain	TetR_C	335	335	288	147	142	117	62.9293	71.7236	60.7142	32.775	32.4015	31.0913
Rv1362c	813.567	876.332	703.365	246.695	316.326	320.77	-1.43897	2.9e-22	5.62e-21	Rv1362c	NC_000962.3	1533948	1534610	-	663	protein_coding	membrane protein&&sp|P9WM00|Y1362_MYCTO Uncharacterized protein MT1407 OS=Mycobacterium tuberculosis (strain CDC 1551 / Oshkosh) OX=83331 GN=MT1407 PE=4 SV=1 && -	-	957	905	734	244	308	267	213.122	229.707	183.444	64.4948	83.3175	84.1149
Rv1378c	774.462	933.463	935.264	2264.74	2640.5	3571.72	1.6812	1.89e-27	5.29e-26	Rv1378c	NC_000962.3	1551228	1552655	-	1428	protein_coding	hypothetical protein&&-- && PF02720:Domain of unknown function (DUF222)	DUF222	911	964	976	2240	2571	2973	94.1934	113.603	113.251	274.896	322.903	434.853
Rv1383	845.022	1245.26	1355.94	558.096	557.679	406.068	-1.17711	1.61e-11	1.37e-10	carA	NC_000962.3	1555971	1557101	+	1131	protein_coding	carbamoyl-phosphate synthase small subunit&&sp|P9WPK4|CARA_MYCTO Carbamoyl-phosphate synthase small chain OS=Mycobacterium tuberculosis (strain CDC 1551 / Oshkosh) OX=83331 GN=carA PE=3 SV=1 && PF00988:Carbamoyl-phosphate synthase small chain, CPSase domain|PF00117:Glutamine amidotransferase class-I	CPSase_sm_chain	994	1286	1415	552	543	338	129.764	191.345	207.307	85.5313	86.1065	62.4208
Rv1384	2585.22	3576.02	3819.63	1267.85	1493.31	1077.64	-1.37771	4.36e-19	6.63e-18	carB	NC_000962.3	1557101	1560448	+	3348	protein_coding	carbamoyl-phosphate synthase large subunit&&sp|P9WPK2|CARB_MYCTO Carbamoyl-phosphate synthase large chain OS=Mycobacterium tuberculosis (strain CDC 1551 / Oshkosh) OX=83331 GN=carB PE=3 SV=1 && PF02786:Carbamoyl-phosphate synthase L chain, ATP binding domain|PF02142:MGS-like domain|PF02787:Carbamoyl-phosphate synthetase large chain, oligomerisation domain	CPSase_L_D2	3041	3693	3986	1254	1454	897	134.11	185.624	197.275	65.6388	77.8893	55.9606
Rv1385	495.621	560.659	666.951	291.181	285.515	259.499	-1.04118	6.13e-12	5.47e-11	pyrF	NC_000962.3	1560445	1561269	+	825	protein_coding	orotidine 5'-phosphate decarboxylase&&sp|P0A5M7|PYRF_MYCBO Orotidine 5'-phosphate decarboxylase OS=Mycobacterium bovis (strain ATCC BAA-935 / AF2122/97) OX=233413 GN=pyrF PE=3 SV=1 && PF00215:Orotidine 5'-phosphate decarboxylase / HUMPS family	-	583	579	696	288	278	216	104.339	118.104	139.79	61.1768	60.4352	54.6859
Rv1387	515.174	586.804	627.662	1406.36	1142.06	1799.68	1.32964	2.69e-17	3.55e-16	PPE20	NC_000962.3	1561769	1563388	+	1620	protein_coding	PPE family protein PPE20&&sp|P9WI22|PPE20_MYCTO Uncharacterized PPE family protein PPE20 OS=Mycobacterium tuberculosis (strain CDC 1551 / Oshkosh) OX=83331 GN=PPE20 PE=3 SV=1 && PF00823:PPE family	-	606	606	655	1391	1112	1498	55.2316	62.9502	66.9957	150.474	123.109	193.14
Rv1389	5269.06	4361.33	4855.52	2255.64	2420.72	2319.88	-1.05012	1.86e-22	3.66e-21	gmk	NC_000962.3	1564401	1565027	+	627	protein_coding	guanylate kinase&&sp|P0A5I5|KGUA_MYCBO Guanylate kinase OS=Mycobacterium bovis (strain ATCC BAA-935 / AF2122/97) OX=233413 GN=gmk PE=3 SV=1 && PF00625:Guanylate kinase	-	6198	4504	5067	2231	2357	1931	1459.53	1208.84	1339.07	623.563	674.203	643.265
Rv1394c	266.088	234.334	231.899	687.51	651.139	663.165	1.44942	4.51e-27	1.21e-25	cyp132	NC_000962.3	1569584	1570969	-	1386	protein_coding	cytochrome P450 Cyp132&&sp|P9WPN3|CP132_MYCTU Putative cytochrome P450 132 OS=Mycobacterium tuberculosis (strain ATCC 25618 / H37Rv) OX=83332 GN=cyp132 PE=1 SV=1 && PF00067:Cytochrome P450	p450	313	242	242	680	634	552	33.3435	29.3827	28.9316	85.9793	82.0398	83.1862
Rv1395	96.0638	108.452	106.367	192.098	220.812	284.728	1.16414	5.42e-09	3.49e-08	Rv1395	NC_000962.3	1571047	1572081	+	1035	protein_coding	HTH-type transcriptional regulator&&sp|P9WMJ0|Y1395_MYCTO Uncharacterized HTH-type transcriptional regulator MT1440 OS=Mycobacterium tuberculosis (strain CDC 1551 / Oshkosh) OX=83331 GN=MT1440 PE=4 SV=1 && PF12833:Helix-turn-helix domain|PF12625:Arabinose-binding domain of AraC transcription regulator, N-term	-	113	112	111	190	215	237	16.1201	18.2103	17.7706	32.1708	37.2561	47.8281
Rv1396c	379.155	342.786	429.302	863.432	913.033	1512.54	1.51322	4.79e-16	5.87e-15	PE_PGRS25	NC_000962.3	1572127	1573857	-	1731	protein_coding	PE-PGRS family protein PE_PGRS25&&sp|P9WIF8|PG20_MYCTO Uncharacterized PE-PGRS family protein PE_PGRS20 OS=Mycobacterium tuberculosis (strain CDC 1551 / Oshkosh) OX=83331 GN=PE_PGRS20 PE=3 SV=1 && PF00934:PE family	-	446	354	448	854	889	1259	38.0424	34.4148	42.8846	86.4588	92.1093	151.916
Rv1397c	223.582	239.176	228.066	553.041	618.274	756.873	1.47968	2.49e-22	4.86e-21	vapC10	NC_000962.3	1574112	1574513	-	402	protein_coding	ribonuclease VapC10&&sp|P9WFA6|VPC10_MYCTO Ribonuclease VapC10 OS=Mycobacterium tuberculosis (strain CDC 1551 / Oshkosh) OX=83331 GN=vapC10 PE=3 SV=1 && PF01850:PIN domain	-	263	247	238	547	602	630	96.5962	103.398	98.1005	238.457	268.577	327.333
Rv1398c	379.155	334.071	361.265	668.3	811.356	1197.78	1.31531	3.43e-13	3.41e-12	vapB10	NC_000962.3	1574510	1574767	-	258	protein_coding	antitoxin VapB10&&sp|P9WLZ0|VPB10_MYCTO Putative antitoxin VapB10 OS=Mycobacterium tuberculosis (strain CDC 1551 / Oshkosh) OX=83331 GN=vapB10 PE=3 SV=1 && PF01402:Ribbon-helix-helix protein, copG family	RHH_1	446	345	377	661	790	997	255.238	225.029	242.126	448.983	549.169	807.144
Rv1403c	62.9091	74.5609	75.7027	311.402	338.921	282.326	2.13346	5.09e-30	1.68e-28	Rv1403c	NC_000962.3	1579598	1580422	-	825	protein_coding	methyltransferase&&sp|P9WLY8|Y1403_MYCTO Uncharacterized protein MT1447 OS=Mycobacterium tuberculosis (strain CDC 1551 / Oshkosh) OX=83331 GN=MT1447 PE=3 SV=1 && PF13649:Methyltransferase domain	-	74	77	79	308	330	235	13.2437	15.7064	15.867	65.4252	71.7396	59.4962
Rv1404	1021.85	984.784	973.595	1957.38	1751.09	2896.54	1.14737	5.84e-13	5.64e-12	Rv1404	NC_000962.3	1580591	1581073	+	483	protein_coding	transcriptional regulator&&-- && PF01047:MarR family	MarR	1202	1017	1016	1936	1705	2411	367.441	354.335	348.552	702.436	633.105	1042.62
Rv1405c	87.5626	111.357	136.073	1709.68	2047.9	2179.31	4.15179	3.84e-149	5.3e-146	Rv1405c	NC_000962.3	1581145	1581969	-	825	protein_coding	methyltransferase&&sp|P9WLY6|Y1405_MYCTO Uncharacterized protein MT1449 OS=Mycobacterium tuberculosis (strain CDC 1551 / Oshkosh) OX=83331 GN=MT1449 PE=3 SV=1 && PF08241:Methyltransferase domain	Methyltransf_11	103	115	142	1691	1994	1814	18.4337	23.4576	28.5203	359.201	433.481	459.26
Rv1433	1404.4	1349.84	1341.57	225.463	348.164	290.735	-2.24502	1.88e-52	1.55e-50	Rv1433	NC_000962.3	1611434	1612249	+	816	protein_coding	hypothetical protein&&sp|O06825|LDT3_MYCTU Probable L,D-transpeptidase 3 OS=Mycobacterium tuberculosis (strain ATCC 25618 / H37Rv) OX=83332 GN=Rv1433 PE=1 SV=1 && PF03734:L,D-transpeptidase catalytic domain|PF17964:Bacterial Ig domain	-	1652	1394	1400	223	339	242	298.917	287.483	284.288	47.892	74.5089	61.9442
Rv1434	269.489	294.37	359.348	105.149	108.866	104.521	-1.53381	5.94e-17	7.72e-16	Rv1434	NC_000962.3	1612256	1612393	+	138	protein_coding	hypothetical protein&&-- && -	-	317	304	375	104	106	87	339.165	370.71	450.27	132.07	137.761	131.679
Rv1435c	5737.48	5934.85	6063.88	1949.29	2859.26	3339.85	-1.12255	3.82e-13	3.76e-12	Rv1435c	NC_000962.3	1612342	1612950	-	609	protein_coding	hypothetical protein&&-- && -	-	6749	6129	6328	1928	2784	2780	1636.26	1693.6	1721.75	554.802	819.881	953.461
Rv1469	531.327	509.338	550.043	161.767	283.461	166.993	-1.37519	3.92e-13	3.85e-12	ctpD	NC_000962.3	1656963	1658936	+	1974	protein_coding	cobalt/nickel-exporting P-type ATPase&&sp|P63686|CTPD_MYCBO Probable cobalt/nickel-exporting P-type ATPase OS=Mycobacterium bovis (strain ATCC BAA-935 / AF2122/97) OX=233413 GN=ctpD PE=3 SV=1 && PF00122:E1-E2 ATPase|PF00702:haloacid dehalogenase-like hydrolase	E1-E2_ATPase	625	526	574	160	276	139	46.748	44.8413	48.182	14.2043	25.0761	14.7076
Rv1475c	3698.88	3289.39	3090.4	6575.83	6509.34	8050.49	1.06805	3.99e-19	6.09e-18	acn	NC_000962.3	1663215	1666046	-	2832	protein_coding	iron-regulated aconitate hydratase&&sp|O53166|ACNA_MYCTU Aconitate hydratase A OS=Mycobacterium tuberculosis (strain ATCC 25618 / H37Rv) OX=83332 GN=acn PE=1 SV=1 && PF00330:Aconitase family (aconitate hydratase)|PF00694:Aconitase C-terminal domain	Aconitase	4351	3397	3225	6504	6338	6701	226.843	201.856	188.693	402.472	401.382	494.222
Rv1477	3285.72	2753.91	2842.21	1361.88	1546.71	1350.36	-1.06031	4.33e-20	7.34e-19	ripA	NC_000962.3	1666990	1668408	+	1419	protein_coding	peptidoglycan endopeptidase RipA&&sp|O53168|RIPA_MYCTU Peptidoglycan endopeptidase RipA OS=Mycobacterium tuberculosis (strain ATCC 25618 / H37Rv) OX=83332 GN=ripA PE=1 SV=1 && PF00877:NlpC/P60 family	-	3865	2844	2966	1347	1506	1124	402.159	337.277	346.345	166.354	190.345	165.447
Rv1478	1129.81	930.558	1041.63	432.727	557.679	380.839	-1.17631	4.72e-15	5.26e-14	Rv1478	NC_000962.3	1668419	1669144	+	726	protein_coding	peptidoglycan endopeptidase RipB&&sp|P9WHU4|RIPB_MYCTO Peptidoglycan endopeptidase RipB OS=Mycobacterium tuberculosis (strain CDC 1551 / Oshkosh) OX=83331 GN=ripB PE=3 SV=1 && PF00877:NlpC/P60 family	-	1329	961	1087	428	543	317	270.283	222.754	248.092	103.313	134.141	91.2007
Rv1532c	203.179	177.203	152.364	488.334	435.462	449.318	1.36399	4.13e-18	5.83e-17	Rv1532c	NC_000962.3	1733116	1733550	-	435	protein_coding	hypothetical protein&&-- && PF03061:Thioesterase superfamily	4HBT	239	183	159	483	424	374	81.1221	70.7948	60.5659	194.584	174.814	179.58
Rv1533	1623.73	1323.7	1384.69	3765.13	2947.59	3445.57	1.22908	1.63e-22	3.26e-21	Rv1533	NC_000962.3	1733610	1734737	+	1128	protein_coding	monooxygenase&&sp|O06179|Y1533_MYCTU Putative monooxygenase Rv1533 OS=Mycobacterium tuberculosis (strain ATCC 25618 / H37Rv) OX=83332 GN=Rv1533 PE=1 SV=1 && PF03060:Nitronate monooxygenase	NPD	1910	1367	1445	3724	2870	2868	250.008	203.938	212.265	578.561	456.322	531.062
Rv1535	5747.68	3393	3472.74	1359.85	1183.14	1581.02	-1.61346	5.86e-20	9.69e-19	Rv1535	NC_000962.3	1735976	1736212	+	237	protein_coding	hypothetical protein&&-- && -	-	6761	3504	3624	1345	1152	1316	4212.04	2488.03	2533.73	994.54	871.772	1159.8
Rv1541c	463.317	342.786	405.345	1051.49	836.005	997.15	1.25018	9.07e-18	1.26e-16	lprI	NC_000962.3	1743778	1744371	-	594	protein_coding	lipoprotein LprI&&sp|P65319|LPRI_MYCBO Lipoprotein LprI OS=Mycobacterium bovis (strain ATCC BAA-935 / AF2122/97) OX=233413 GN=lprI PE=3 SV=1 && PF09864:Membrane-bound lysozyme-inhibitor of c-type lysozyme	-	545	354	423	1040	814	830	135.469	100.29	117.998	306.828	245.774	291.855
Rv1542c	436.113	264.352	372.764	4521.39	3822.62	5092.67	3.6442	1.26e-114	4.73e-112	glbN	NC_000962.3	1744426	1744836	-	411	protein_coding	hemoglobin GlbN&&sp|P0A593|TRHBN_MYCBO Group 1 truncated hemoglobin GlbN OS=Mycobacterium bovis (strain ATCC BAA-935 / AF2122/97) OX=233413 GN=glbN PE=1 SV=1 && PF01152:Bacterial-like globin	-	513	273	389	4472	3722	4239	184.292	111.779	156.83	1906.81	1624.18	2154.25
Rv1547	5891.35	5899.02	5842.53	2766.22	2782.23	2850.89	-1.07002	5.99e-31	2.1e-29	dnaE1	NC_000962.3	1747694	1751248	+	3555	protein_coding	DNA polymerase III subunit alpha&&sp|P63978|DPO3A_MYCBO DNA polymerase III subunit alpha OS=Mycobacterium bovis (strain ATCC BAA-935 / AF2122/97) OX=233413 GN=dnaE PE=3 SV=1 && PF17657:Bacterial DNA polymerase III alpha subunit finger domain|PF02811:PHP domain|PF07733:Bacterial DNA polymerase III alpha NTPase domain|PF14579:Helix-hairpin-helix motif	-	6930	6092	6097	2736	2709	2373	287.822	288.377	284.182	134.873	136.668	139.423
Rv1566c	1280.28	1143.59	1147.04	517.654	611.085	534.617	-1.10215	3.1e-19	4.78e-18	Rv1566c	NC_000962.3	1773928	1774620	-	693	protein_coding	hypothetical protein&&sp|O53168|RIPA_MYCTU Peptidoglycan endopeptidase RipA OS=Mycobacterium tuberculosis (strain ATCC 25618 / H37Rv) OX=83332 GN=ripA PE=1 SV=1 && PF00877:NlpC/P60 family	-	1506	1181	1197	512	595	445	320.865	286.785	286.208	129.475	153.986	134.123
Rv1593c	300.093	424.125	377.555	794.681	1037.3	1075.24	1.40068	1.01e-18	1.49e-17	Rv1593c	NC_000962.3	1793997	1794707	-	711	protein_coding	hypothetical protein&&-- && PF00293:NUDIX domain	NUDIX	353	438	394	786	1010	895	73.3053	103.668	91.8221	193.732	254.771	262.923
Rv1594	3646.18	3931.39	3317.5	9150.96	9541.14	10905	1.44168	3.4e-38	1.64e-36	nadA	NC_000962.3	1794756	1795805	+	1050	protein_coding	quinolinate synthetase A&&sp|P65498|NADA_MYCBO Quinolinate synthase A OS=Mycobacterium bovis (strain ATCC BAA-935 / AF2122/97) OX=233413 GN=nadA PE=3 SV=1 && PF02445:Quinolinate synthetase A protein	-	4289	4060	3462	9051	9290	9077	603.111	650.693	546.334	1510.62	1586.81	1805.63
Rv1595	3034.09	3270.03	2832.62	9708.04	9191.95	9942.67	1.65844	1.15e-60	1.3e-58	nadB	NC_000962.3	1795805	1797388	+	1584	protein_coding	L-aspartate oxidase&&sp|P65500|NADB_MYCBO L-aspartate oxidase OS=Mycobacterium bovis (strain ATCC BAA-935 / AF2122/97) OX=233413 GN=nadB PE=3 SV=1 && PF00890:FAD binding domain	-	3569	3377	2956	9602	8950	8276	332.676	358.769	309.221	1062.32	1013.37	1091.29
Rv1596	1507.27	1429.24	1259.16	3438.56	3354.29	4190.43	1.38776	1.48e-29	4.68e-28	nadC	NC_000962.3	1797388	1798245	+	858	protein_coding	nicotinate-nucleotide pyrophosphatase&&sp|P9WJJ6|NADC_MYCTO Nicotinate-nucleotide pyrophosphorylase [carboxylating] OS=Mycobacterium tuberculosis (strain CDC 1551 / Oshkosh) OX=83331 GN=nadC PE=3 SV=1 && PF02749:Quinolinate phosphoribosyl transferase, N-terminal domain|PF01729:Quinolinate phosphoribosyl transferase, C-terminal domain	-	1773	1476	1314	3401	3266	3488	305.107	289.493	253.763	694.653	682.696	849.111
Rv1599	1117.91	992.531	1017.67	2265.75	1903.09	2371.54	1.0634	8.74e-19	1.3e-17	hisD	NC_000962.3	1799583	1800899	+	1317	protein_coding	histidinol dehydrogenase&&sp|P9WNW8|HISX_MYCTO Histidinol dehydrogenase OS=Mycobacterium tuberculosis (strain CDC 1551 / Oshkosh) OX=83331 GN=hisD PE=3 SV=2 && PF00815:Histidinol dehydrogenase	-	1315	1025	1062	2241	1853	1974	147.425	130.972	133.616	298.198	252.341	313.067
Rv1627c	1209.72	1119.38	1274.49	3061.44	2842.83	4613.32	1.54483	1.75e-22	3.46e-21	Rv1627c	NC_000962.3	1828865	1830073	-	1209	protein_coding	nonspecific lipid-transfer protein&&sp|P07857|SCP2_BOVIN Sterol carrier protein 2 OS=Bos taurus OX=9913 GN=SCP2 PE=1 SV=2 && PF00108:Thiolase, N-terminal domain	Thiolase_N	1423	1156	1330	3028	2768	3840	173.784	160.906	182.283	438.913	410.619	663.407
Rv1628c	390.206	336.976	294.187	1005.99	889.411	974.324	1.48874	2.5e-27	6.94e-26	Rv1628c	NC_000962.3	1830070	1830561	-	492	protein_coding	hypothetical protein&&-- && PF01796:DUF35 OB-fold domain, acyl-CoA-associated|PF12172:Rubredoxin-like zinc ribbon domain (DUF35_N)	-	459	348	307	995	866	811	137.746	119.029	103.394	354.41	315.683	344.295
Rv1632c	1147.67	1182.32	1303.24	386.219	426.219	462.533	-1.51213	1.67e-33	6.64e-32	Rv1632c	NC_000962.3	1836387	1836830	-	444	protein_coding	hypothetical protein&&-- && PF04167:Protein of unknown function (DUF402)	-	1350	1221	1360	382	415	385	448.933	462.778	507.547	150.775	167.635	181.114
Rv1638A	556.83	712.686	629.578	237.595	225.947	203.034	-1.50779	7.64e-24	1.65e-22	Rv1638A	NC_000962.3	1846716	1846973	-	258	protein_coding	hypothetical protein&&-- && -	-	655	736	657	235	220	169	374.845	480.062	421.955	159.623	152.933	136.818
Rv1639c	1073.7	1216.21	1232.33	533.831	561.787	575.464	-1.07581	1.73e-19	2.72e-18	Rv1639c	NC_000962.3	1846989	1848458	-	1470	protein_coding	hypothetical protein&&-- && PF00756:Putative esterase	-	1263	1256	1286	528	547	479	126.858	143.784	144.959	62.9455	66.7373	68.0603
Rv1654	334.098	385.392	347.849	885.674	710.707	649.95	1.07528	2.83e-13	2.83e-12	argB	NC_000962.3	1867842	1868726	+	885	protein_coding	acetylglutamate kinase&&sp|P0A4Y7|ARGB_MYCBO Acetylglutamate kinase OS=Mycobacterium bovis (strain ATCC BAA-935 / AF2122/97) OX=233413 GN=argB PE=3 SV=1 && PF00696:Amino acid kinase family	AA_kinase	393	398	363	876	692	541	65.5661	75.6797	67.9648	173.464	140.237	127.682
Rv1655	226.983	274.035	296.103	796.703	676.815	419.284	1.25039	2.71e-10	2.04e-09	argD	NC_000962.3	1868723	1869925	+	1203	protein_coding	acetylornithine aminotransferase&&sp|P63569|ARGD_MYCBO Acetylornithine aminotransferase OS=Mycobacterium bovis (strain ATCC BAA-935 / AF2122/97) OX=233413 GN=argD PE=3 SV=1 && PF00202:Aminotransferase class-III	Aminotran_3	267	283	309	788	659	349	32.77	39.5877	42.5611	114.791	98.2468	60.5948
Rv1657	104.565	109.42	122.658	258.827	277.299	330.381	1.36311	3.56e-14	3.74e-13	argR	NC_000962.3	1870842	1871354	+	513	protein_coding	arginine repressor&&sp|P0A4Y9|ARGR_MYCBO Arginine repressor OS=Mycobacterium bovis (strain ATCC BAA-935 / AF2122/97) OX=233413 GN=argR PE=3 SV=1 && PF01316:Arginine repressor, DNA binding domain|PF02863:Arginine repressor, C-terminal domain	Arg_repressor	123	113	128	256	270	275	35.4012	37.0681	41.3441	87.4523	94.3942	111.967
Rv1671	419.11	419.284	370.848	173.9	187.947	175.402	-1.17032	1.7e-14	1.82e-13	Rv1671	NC_000962.3	1896475	1896867	+	393	protein_coding	membrane protein&&-- && -	-	493	433	387	172	183	146	185.219	185.411	163.169	76.6981	83.5136	77.5953
Rv1684	537.277	562.596	536.627	186.032	204.38	186.215	-1.50404	2.9e-26	7.26e-25	Rv1684	NC_000962.3	1910586	1910810	+	225	protein_coding	hypothetical protein&&sp|Q5FSV8|Y764_GLUOX UPF0434 protein GOX0764 OS=Gluconobacter oxydans (strain 621H) OX=290633 GN=GOX0764 PE=3 SV=1 && PF03966:Trm112p-like protein	-	632	581	560	184	199	155	414.729	434.543	412.407	143.312	158.624	143.888
Rv1690	586.584	717.527	658.326	267.927	308.11	240.277	-1.26276	1.02e-17	1.41e-16	lprJ	NC_000962.3	1915527	1915910	+	384	protein_coding	lipoprotein LprJ&&sp|O33192|LPRJ_MYCTU Putative lipoprotein LprJ OS=Mycobacterium tuberculosis (strain ATCC 25618 / H37Rv) OX=83332 GN=lprJ PE=1 SV=1 && PF05305:Protein of unknown function (DUF732)	-	690	741	687	265	300	200	265.307	324.733	296.446	120.938	140.116	108.786
Rv1697	3477.85	3128.65	3045.36	1044.41	1798.34	1179.76	-1.26247	1.43e-14	1.54e-13	Rv1697	NC_000962.3	1921542	1922723	+	1182	protein_coding	hypothetical protein&&-- && PF12555:Thiamine pyrophosphokinase C terminal	-	4091	3231	3178	1033	1751	982	511.025	460.001	445.509	153.155	265.685	173.528
Rv1698	1053.3	1123.25	1080.92	279.048	429.3	323.173	-1.6583	5.17e-28	1.51e-26	mctB	NC_000962.3	1922745	1923689	+	945	protein_coding	copper transporter MctB&&sp|P64884|MCTB_MYCBO Copper transporter MctB OS=Mycobacterium bovis (strain ATCC BAA-935 / AF2122/97) OX=233413 GN=mctB PE=3 SV=1 && PF11382:Copper transport outer membrane protein, MctB	-	1239	1160	1128	276	418	269	193.584	206.569	197.787	51.183	79.3311	59.456
Rv1705c	259.287	207.221	205.068	687.51	853.465	653.554	1.70695	8.33e-28	2.34e-26	PPE22	NC_000962.3	1931497	1932654	-	1158	protein_coding	PPE family protein PPE22&&sp|P9WI19|PPE22_MYCTU Uncharacterized PPE family protein PPE22 OS=Mycobacterium tuberculosis (strain ATCC 25618 / H37Rv) OX=83332 GN=PPE22 PE=3 SV=1 && PF00823:PPE family|PF12484:Polymorphic PE/PPE proteins C terminal	-	305	214	214	680	831	544	38.8885	31.0989	30.6214	102.908	128.704	98.1218
Rv1706A	12.7518	22.2714	16.2905	43.4749	41.0813	51.6596	1.41284	0.000246962	0.000767624	Rv1706A	NC_000962.3	1934482	1934649	-	168	protein_coding	hypothetical protein&&-- && -	-	15	23	17	43	40	43	13.1829	23.0387	16.7672	44.8547	42.7021	53.4607
Rv1706c	196.378	158.805	176.32	577.306	649.085	676.38	1.83726	2.33e-35	1e-33	PPE23	NC_000962.3	1932694	1933878	-	1185	protein_coding	PPE family protein PPE23&&sp|P9WI16|PPE23_MYCTO Uncharacterized PPE family protein PPE23 OS=Mycobacterium tuberculosis (strain CDC 1551 / Oshkosh) OX=83331 GN=PPE23 PE=3 SV=1 && PF00823:PPE family|PF12484:Polymorphic PE/PPE proteins C terminal	-	231	164	184	571	632	563	28.7822	23.2898	25.7288	84.4435	95.6528	99.2351
Rv1720c	79.0614	50.3528	76.661	137.502	158.163	160.986	1.14361	6.05e-07	2.93e-06	vapC12	NC_000962.3	1947030	1947419	-	390	protein_coding	ribonuclease VapC12&&sp|P9WFA2|VPC12_MYCTO Ribonuclease VapC12 OS=Mycobacterium tuberculosis (strain CDC 1551 / Oshkosh) OX=83331 GN=vapC12 PE=3 SV=1 && PF01850:PIN domain	-	93	52	80	136	154	134	35.2086	22.4377	33.9896	61.1115	70.8198	71.7655
Rv1754c	930.034	1008.02	998.509	228.496	259.839	240.277	-2.01052	3.2e-54	2.82e-52	Rv1754c	NC_000962.3	1984979	1986670	-	1692	protein_coding	hypothetical protein&&-- && PF13810:Domain of unknown function (DUF4185)	-	1094	1041	1042	226	253	200	95.4657	103.536	102.044	23.4076	26.8175	24.6891
Rv1758	141.12	135.565	133.198	575.284	558.706	592.283	2.07331	4.24e-46	2.74e-44	cut1	NC_000962.3	1989042	1989566	+	525	protein_coding	cutinase&&sp|O06793|CULP5_MYCTU Probable carboxylesterase Culp5 OS=Mycobacterium tuberculosis (strain ATCC 25618 / H37Rv) OX=83332 GN=cut1 PE=3 SV=1 && PF01083:Cutinase	-	166	140	139	569	544	493	46.6852	44.8754	43.8708	189.933	185.84	196.139
Rv1771	1411.2	1624.85	1634.8	712.786	642.923	758.074	-1.14433	2.58e-21	4.72e-20	Rv1771	NC_000962.3	2005161	2006447	+	1287	protein_coding	L-gulono-1%2C4-lactone dehydrogenase&&sp|P9WIT2|GULDH_MYCTO L-gulono-1,4-lactone dehydrogenase OS=Mycobacterium tuberculosis (strain CDC 1551 / Oshkosh) OX=83331 GN=MT1821 PE=3 SV=1 && PF01565:FAD binding domain|PF04030:D-arabinono-1,4-lactone oxidase	ALO	1660	1678	1706	705	626	631	190.441	219.408	219.645	95.9973	87.2358	102.406
Rv1780	1514.07	1549.32	1582.09	562.14	725.086	766.484	-1.17883	1.69e-19	2.68e-18	Rv1780	NC_000962.3	2014699	2015262	+	564	protein_coding	hypothetical protein&&-- && -	-	1781	1600	1651	556	706	638	466.246	477.398	485.052	172.76	224.504	236.275
Rv1787	683.498	595.519	634.37	354.876	443.678	151.375	-1.00927	0.0208682	0.0410609	PPE25	NC_000962.3	2025301	2026398	+	1098	protein_coding	PPE family protein PPE25&&sp|P9WI13|PPE25_MYCTU Uncharacterized PPE family protein PPE25 OS=Mycobacterium tuberculosis (strain ATCC 25618 / H37Rv) OX=83332 GN=PPE25 PE=3 SV=1 && PF12484:Polymorphic PE/PPE proteins C terminal|PF00823:PPE family	-	804	615	662	351	432	126	108.115	94.2567	99.9024	56.0213	70.5635	23.9687
Rv1788	618.889	547.102	552.917	270.96	315.299	123.743	-1.27409	0.00098669	0.0026853	PE18	NC_000962.3	2026477	2026776	+	300	protein_coding	PE family protein PE18&&sp|P9WIF2|PG34_MYCTO Uncharacterized PE-PGRS family protein PE_PGRS34 OS=Mycobacterium tuberculosis (strain CDC 1551 / Oshkosh) OX=83331 GN=PE_PGRS34 PE=3 SV=1 && PF00934:PE family	-	728	565	577	268	307	103	358.295	316.933	318.695	156.553	183.534	71.7119
Rv1804c	119.867	95.864	125.532	424.638	453.949	688.394	2.19593	2.28e-28	6.94e-27	Rv1804c	NC_000962.3	2047023	2047349	-	327	protein_coding	hypothetical protein&&-- && PF05305:Protein of unknown function (DUF732)	-	141	99	131	420	442	573	63.6651	50.948	66.381	225.087	242.423	366.001
Rv1809	1472.41	1314.98	1135.54	539.897	554.598	564.651	-1.24221	3.98e-22	7.69e-21	PPE33	NC_000962.3	2051282	2052688	+	1407	protein_coding	PPE family protein PPE33&&sp|P9WI03|PPE33_MYCTU Uncharacterized PPE family protein PPE33 OS=Mycobacterium tuberculosis (strain ATCC 25618 / H37Rv) OX=83332 GN=PPE33 PE=1 SV=1 && PF12484:Polymorphic PE/PPE proteins C terminal|PF00823:PPE family	-	1732	1358	1185	534	540	470	181.754	162.422	139.555	66.5113	68.8333	69.7717
Rv1813c	1927.23	1422.47	1515.97	3947.12	2025.31	12770.7	1.94561	0.0121803	0.0258355	Rv1813c	NC_000962.3	2055681	2056112	-	432	protein_coding	hypothetical protein&&sp|P9WLS0|Y1813_MYCTO Uncharacterized protein MT1861 OS=Mycobacterium tuberculosis (strain CDC 1551 / Oshkosh) OX=83331 GN=MT1861 PE=2 SV=1 && PF13827:Domain of unknown function (DUF4189)	-	2267	1469	1582	3904	1972	10630	774.815	572.239	606.797	1583.71	818.695	5139.55
Rv1832	1546.37	1671.33	1753.62	3906.67	3550.45	3838.43	1.18428	7.83e-30	2.53e-28	gcvB	NC_000962.3	2075877	2078702	+	2826	protein_coding	glycine dehydrogenase&&sp|A5U3J9|GCSP_MYCTA Glycine dehydrogenase (decarboxylating) OS=Mycobacterium tuberculosis (strain ATCC 25177 / H37Ra) OX=419947 GN=gcvP PE=3 SV=1 && PF02347:Glycine cleavage system P-protein	-	1819	1726	1830	3864	3457	3195	95.0366	102.78	107.3	239.615	219.395	236.142
Rv1845c	421.661	457.048	550.043	1035.31	927.411	1164.14	1.13011	8.59e-16	1.03e-14	blaR	NC_000962.3	2095218	2096168	-	951	protein_coding	sensor-transducer protein BlaR&&-- && PF01435:Peptidase family M48	Peptidase_M48	496	472	574	1024	903	969	77.0072	83.522	100.012	188.698	170.297	212.823
Rv1846c	1328.74	1283.03	1280.24	2647.92	2457.69	3348.26	1.11851	1.57e-18	2.26e-17	blaI	NC_000962.3	2096183	2096599	-	417	protein_coding	transcriptional repressor BlaI&&sp|P9WMJ4|BLAI_MYCTO Transcriptional regulator BlaI OS=Mycobacterium tuberculosis (strain CDC 1551 / Oshkosh) OX=83331 GN=blaI PE=3 SV=1 && PF03965:Penicillinase repressor	Pencillinase_R	1563	1325	1336	2619	2393	2787	553.418	534.711	530.873	1100.65	1029.21	1395.97
Rv1861	242.285	206.253	180.153	86.9498	112.974	85.2984	-1.13932	3.04e-08	1.76e-07	Rv1861	NC_000962.3	2109165	2109470	+	306	protein_coding	transmembrane protein&&-- && PF04226:Transglycosylase associated protein	-	285	213	188	86	110	71	137.516	117.138	101.802	49.2522	64.4718	48.4632
Rv1894c	366.403	365.058	367.973	1295.15	1561.09	2023.13	2.1491	2.16e-44	1.28e-42	Rv1894c	NC_000962.3	2140739	2141869	-	1131	protein_coding	hypothetical protein&&sp|O06179|Y1533_MYCTU Putative monooxygenase Rv1533 OS=Mycobacterium tuberculosis (strain ATCC 25618 / H37Rv) OX=83332 GN=Rv1533 PE=1 SV=1 && PF03060:Nitronate monooxygenase	NPD	431	377	384	1281	1520	1684	56.2659	56.0943	56.2586	198.488	241.035	310.996
Rv1895	201.479	204.316	177.279	412.506	452.922	553.839	1.2811	1.44e-15	1.69e-14	Rv1895	NC_000962.3	2142521	2143675	+	1155	protein_coding	zinc-binding alcohol dehydrogenase&&sp|O07737|Y1895_MYCTU Probable zinc-binding alcohol dehydrogenase Rv1895 OS=Mycobacterium tuberculosis (strain ATCC 25618 / H37Rv) OX=83332 GN=Rv1895 PE=1 SV=1 && PF08240:Alcohol dehydrogenase GroES-like domain|PF00107:Zinc-binding dehydrogenase	ADH_N	237	211	185	408	441	461	30.2968	30.7426	26.5406	61.9051	68.4787	83.367
Rv1921c	620.589	602.297	603.705	180.977	241.353	136.958	-1.70277	1.72e-22	3.43e-21	lppF	NC_000962.3	2172524	2173795	-	1272	protein_coding	lipoprotein LppF&&-- && PF12710:haloacid dehalogenase-like hydrolase	-	730	622	630	179	235	114	84.7356	82.2892	82.068	24.6612	33.1344	18.7195
Rv1945	93.5135	80.3708	83.3688	41.4528	43.1354	21.6249	-1.26481	2.27e-05	8.63e-05	Rv1945	NC_000962.3	2195989	2197353	+	1365	protein_coding	hypothetical protein&&sp|P9WLQ4|Y1945_MYCTO Uncharacterized protein MT1995 OS=Mycobacterium tuberculosis (strain CDC 1551 / Oshkosh) OX=83331 GN=MT1995 PE=3 SV=1 && PF02720:Domain of unknown function (DUF222)	DUF222	110	83	87	41	42	18	11.8984	10.2326	10.561	5.2638	5.51843	2.75433
Rv1962A	378.304	403.791	448.467	170.866	224.92	176.604	-1.10236	1.37e-11	1.17e-10	vapB35	NC_000962.3	2205277	2205549	-	273	protein_coding	antitoxin VapB35&&sp|P9WF16|VPB35_MYCTO Antitoxin VapB35 OS=Mycobacterium tuberculosis (strain CDC 1551 / Oshkosh) OX=83331 GN=vapB35 PE=3 SV=1 && -	-	445	417	468	169	219	147	240.673	257.047	284.056	108.486	143.873	112.468
Rv1992c	416.56	343.755	403.428	900.84	1035.25	1412.83	1.5232	9.41e-21	1.65e-19	ctpG	NC_000962.3	2234991	2237306	-	2316	protein_coding	cation transporter ATPase G&&sp|P63690|CTPG_MYCBO Probable cation-transporting ATPase G OS=Mycobacterium bovis (strain ATCC BAA-935 / AF2122/97) OX=233413 GN=ctpG PE=3 SV=1 && PF00702:haloacid dehalogenase-like hydrolase|PF00122:E1-E2 ATPase	E1-E2_ATPase	490	355	421	891	1008	1176	31.2383	25.7946	30.1206	67.4198	78.0586	106.058
Rv1993c	49.3071	60.036	34.4974	93.016	162.271	126.145	1.40663	4.12e-07	2.04e-06	Rv1993c	NC_000962.3	2237303	2237575	-	273	protein_coding	hypothetical protein&&sp|P9WLP4|Y1993_MYCTO Uncharacterized protein MT2049 OS=Mycobacterium tuberculosis (strain CDC 1551 / Oshkosh) OX=83331 GN=MT2049 PE=4 SV=1 && PF07371:Protein of unknown function (DUF1490)	-	58	62	36	92	158	105	31.3686	38.2181	21.8504	59.0573	103.799	80.3345
Rv1994c	44.2064	26.1447	30.6644	67.7399	84.2168	141.764	1.52773	2.59e-06	1.14e-05	cmtR	NC_000962.3	2237628	2237984	-	357	protein_coding	HTH-type transcriptional regulator CmtR&&sp|P67732|CMTR_MYCBO HTH-type transcriptional regulator CmtR OS=Mycobacterium bovis (strain ATCC BAA-935 / AF2122/97) OX=233413 GN=cmtR PE=3 SV=1 && PF01022:Bacterial regulatory protein, arsR family	HTH_5	52	27	32	67	82	118	21.5063	12.7273	14.8526	32.8893	41.195	69.0382
Rv1995	42.5061	45.5112	34.4974	251.75	288.596	464.936	3.03292	4.18e-34	1.71e-32	Rv1995	NC_000962.3	2238141	2238908	+	768	protein_coding	hypothetical protein&&sp|P9WLP2|Y1995_MYCTO Uncharacterized protein MT2051 OS=Mycobacterium tuberculosis (strain CDC 1551 / Oshkosh) OX=83331 GN=MT2051 PE=4 SV=1 && PF01814:Hemerythrin HHE cation binding domain	-	50	47	36	249	281	387	9.61256	10.2986	7.76715	56.8181	65.6212	105.251
Rv1999c	67.1597	61.0043	50.7879	237.595	261.894	272.715	2.10529	6.56e-26	1.61e-24	Rv1999c	NC_000962.3	2243816	2245138	-	1323	protein_coding	transporter&&sp|P9WQM2|Y1999_MYCTO Uncharacterized transporter MT2055 OS=Mycobacterium tuberculosis (strain CDC 1551 / Oshkosh) OX=83331 GN=MT2055 PE=3 SV=1 && PF13520:Amino acid permease	-	79	63	53	235	255	227	8.81653	8.01346	6.63799	31.1284	34.5684	35.8378
Rv2010	469.268	416.379	418.761	776.482	824.708	1655.51	1.31946	0.00028261	0.000866055	vapC15	NC_000962.3	2258273	2258671	+	399	protein_coding	ribonuclease VapC15&&sp|P64926|VAPC7_MYCBO VapC ribonuclease Mb2033 OS=Mycobacterium bovis (strain ATCC BAA-935 / AF2122/97) OX=233413 GN=BQ2027_MB2033 PE=3 SV=1 && PF01850:PIN domain	-	552	430	437	768	803	1378	204.266	181.357	181.48	337.316	360.945	721.359
Rv2011c	39.1056	39.7012	42.1635	104.138	124.271	183.812	1.76452	5.97e-11	4.77e-10	Rv2011c	NC_000962.3	2258854	2259285	-	432	protein_coding	hypothetical protein&&sp|P9WLM4|Y2011_MYCTO Uncharacterized protein MT2066 OS=Mycobacterium tuberculosis (strain CDC 1551 / Oshkosh) OX=83331 GN=MT2066 PE=3 SV=1 && PF12802:MarR family	-	46	41	44	103	121	153	15.7219	15.9713	16.8768	41.7832	50.2343	73.9747
Rv2012	59.5086	62.941	64.2036	127.392	125.298	148.972	1.10436	7.87e-07	3.72e-06	Rv2012	NC_000962.3	2259326	2259820	+	495	protein_coding	hypothetical protein&&sp|P9WLM2|Y2012_MYCTO Uncharacterized protein MT2067 OS=Mycobacterium tuberculosis (strain CDC 1551 / Oshkosh) OX=83331 GN=MT2067 PE=4 SV=1 && PF07166:Protein of unknown function (DUF1398)	-	70	65	67	126	122	124	20.8796	22.0977	22.428	44.6081	44.2032	52.3229
Rv2025c	161.523	159.773	220.4	1114.17	801.086	2017.13	2.85978	2.58e-11	2.15e-10	Rv2025c	NC_000962.3	2270750	2271748	-	999	protein_coding	cation efflux system protein&&sp|P9WGF4|Y2025_MYCTO Probable cation efflux system protein MT2084 OS=Mycobacterium tuberculosis (strain CDC 1551 / Oshkosh) OX=83331 GN=MT2084 PE=3 SV=1 && PF16916:Dimerisation domain of Zinc Transporter|PF01545:Cation efflux family	-	190	165	230	1102	780	1679	28.0814	27.7945	38.149	193.315	140.032	351.043
Rv2028c	278.84	312.768	397.679	898.818	339.948	1566.61	1.50359	0.0136959	0.0284947	Rv2028c	NC_000962.3	2274569	2275408	-	840	protein_coding	universal stress protein&&sp|P9WFD8|Y2028_MYCTO Universal stress protein MT2087 OS=Mycobacterium tuberculosis (strain CDC 1551 / Oshkosh) OX=83331 GN=MT2087 PE=2 SV=1 && PF00582:Universal stress protein family	Usp	328	323	415	889	331	1304	57.6534	64.7087	81.8633	185.469	70.672	324.245
Rv2029c	372.354	400.886	426.427	1419.51	519.679	2504.89	1.88914	0.00196197	0.00502837	pfkB	NC_000962.3	2275405	2276424	-	1020	protein_coding	6-phosphofructokinase PfkB&&sp|P9WID2|PFKB_MYCTO Putative ATP-dependent 6-phosphofructokinase isozyme 2 OS=Mycobacterium tuberculosis (strain CDC 1551 / Oshkosh) OX=83331 GN=pfkB PE=2 SV=1 && PF00294:pfkB family carbohydrate kinase	PfkB	438	414	445	1404	506	2085	63.4022	68.303	72.2903	241.221	88.9711	426.954
Rv2033c	1743.6	1684.88	2000.85	425.649	514.544	568.255	-1.84939	1.38e-43	7.79e-42	Rv2033c	NC_000962.3	2280240	2281082	-	843	protein_coding	hypothetical protein&&-- && PF11296:Protein of unknown function (DUF3097)	-	2051	1740	2088	421	501	473	359.227	347.345	410.415	87.5191	106.588	117.195
Rv2034	87.5626	71.6559	49.8296	140.535	251.623	266.708	1.65043	2.24e-10	1.7e-09	Rv2034	NC_000962.3	2281294	2281617	+	324	protein_coding	ArsR family HTH-type transcriptional repressor&&sp|O53478|HTHAR_MYCTU HTH-type transcriptional regulator Rv2034 OS=Mycobacterium tuberculosis (strain ATCC 25618 / H37Rv) OX=83332 GN=Rv2034 PE=1 SV=3 && PF01022:Bacterial regulatory protein, arsR family	HTH_5	103	74	52	139	245	222	46.9378	38.435	26.5937	75.1828	135.619	143.114
Rv2035	90.9631	89.0857	101.576	198.165	258.812	240.277	1.30771	1.07e-11	9.29e-11	Rv2035	NC_000962.3	2281614	2282102	+	489	protein_coding	hypothetical protein&&-- && PF08327:Activator of Hsp90 ATPase homolog 1-like protein	-	107	92	106	196	252	200	32.3076	31.6606	35.9184	70.2418	92.4252	85.4273
Rv2075c	119.017	153.963	103.492	46.508	69.8383	50.4582	-1.17157	5.38e-06	2.26e-05	Rv2075c	NC_000962.3	2331416	2332879	-	1464	protein_coding	hypothetical protein&&sp|P9WLL4|Y2075_MYCTO Uncharacterized protein MT2135 OS=Mycobacterium tuberculosis (strain CDC 1551 / Oshkosh) OX=83331 GN=MT2135 PE=4 SV=1 && -	-	140	159	108	46	68	42	14.1194	18.2766	12.2237	5.50637	8.33041	5.99216
Rv2076c	124.118	101.674	129.365	48.5301	58.5409	51.6596	-1.16213	1.89e-06	8.48e-06	Rv2076c	NC_000962.3	2333037	2333288	-	252	protein_coding	hypothetical protein&&sp|P9WLL2|Y2076_MYCTO Uncharacterized protein MT2136 OS=Mycobacterium tuberculosis (strain CDC 1551 / Oshkosh) OX=83331 GN=MT2136 PE=4 SV=1 && -	-	146	105	135	48	57	43	85.5426	70.1178	88.7674	33.3802	40.567	35.6405
Rv2099c	34.855	31.9547	37.3722	117.281	135.568	290.735	2.37834	3.42e-14	3.61e-13	PE21	NC_000962.3	2358033	2358206	-	174	protein_coding	--&&sp|P0A689|PG36_MYCBO Uncharacterized PE-PGRS family protein PE_PGRS36 OS=Mycobacterium bovis (strain ATCC BAA-935 / AF2122/97) OX=233413 GN=PE_PGRS36 PE=3 SV=1 && PF00934:PE family	-	41	33	39	116	132	242	34.7908	31.9157	37.1395	116.831	136.058	290.497
Rv2102	1003.14	996.404	971.678	418.572	441.624	442.11	-1.19045	3.6e-24	7.87e-23	Rv2102	NC_000962.3	2363391	2364107	+	717	protein_coding	hypothetical protein&&sp|O53500|Y2102_MYCTU Uncharacterized protein Rv2102 OS=Mycobacterium tuberculosis (strain ATCC 25618 / H37Rv) OX=83332 GN=Rv2102 PE=1 SV=4 && PF04434:SWIM zinc finger	SWIM	1180	1029	1014	414	430	368	242.993	241.51	234.336	101.188	107.559	107.202
Rv2131c	597.636	587.772	596.039	1211.23	1084.55	1421.24	1.06017	1.59e-16	2.03e-15	cysQ	NC_000962.3	2392517	2393320	-	804	protein_coding	3'(2')%2C5'-bisphosphate nucleotidase CysQ&&sp|P65164|CYSQ_MYCBO 3'-phosphoadenosine 5'-phosphate phosphatase OS=Mycobacterium bovis (strain ATCC BAA-935 / AF2122/97) OX=233413 GN=cysQ PE=3 SV=1 && PF00459:Inositol monophosphatase family	-	703	607	622	1198	1056	1183	129.101	127.049	128.19	261.125	235.563	307.329
Rv2147c	5218.9	5159.22	5019.38	1736.97	2581.96	2121.65	-1.25746	4.16e-21	7.47e-20	Rv2147c	NC_000962.3	2406118	2406843	-	726	protein_coding	cell division protein SepF&&sp|Q7TYZ5|SEPF_MYCBO Cell division protein SepF OS=Mycobacterium bovis (strain ATCC BAA-935 / AF2122/97) OX=233413 GN=sepF PE=3 SV=2 && PF04472:Cell division protein SepF	-	6139	5328	5238	1718	2514	1766	1248.51	1235	1195.5	414.701	621.051	508.077
Rv2160c	47.6069	43.5745	36.414	69.762	101.676	94.9095	1.05766	0.000131932	0.000436674	Rv2160c	NC_000962.3	2421662	2422278	-	617	protein_coding	--&&-- && PF00440:Bacterial regulatory proteins, tetR family	TetR_N	56	45	38	69	99	79	13.4009	12.2735	10.2051	19.598	28.7772	26.7434
Rv2246	1540.42	1121.32	1367.44	2264.74	2434.07	3741.11	1.06596	5.32e-10	3.86e-09	kasB	NC_000962.3	2519396	2520712	+	1317	protein_coding	3-oxoacyl-ACP synthase 2&&sp|P63457|KASB_MYCBO 3-oxoacyl-[acyl-carrier-protein] synthase 2 OS=Mycobacterium bovis (strain ATCC BAA-935 / AF2122/97) OX=233413 GN=kasB PE=3 SV=1 && PF02801:Beta-ketoacyl synthase, C-terminal domain|PF00109:Beta-ketoacyl synthase, N-terminal domain	ketoacyl-synt	1812	1158	1427	2240	2370	3114	203.143	147.966	179.539	298.065	322.746	493.865
Rv2252	204.029	213.031	190.694	81.8946	108.866	96.1109	-1.08364	2.92e-08	1.69e-07	Rv2252	NC_000962.3	2526989	2527918	+	930	protein_coding	diacylglycerol kinase&&sp|P9WP28|DAGK_MYCTO Diacylglycerol kinase OS=Mycobacterium tuberculosis (strain CDC 1551 / Oshkosh) OX=83331 GN=dagK PE=1 SV=1 && PF00781:Diacylglycerol kinase catalytic domain	-	240	220	199	81	106	80	38.1029	39.8088	35.4561	15.2634	20.4419	17.9673
Rv2253	451.415	569.374	662.159	255.794	248.542	223.458	-1.20699	1.71e-13	1.74e-12	Rv2253	NC_000962.3	2527984	2528487	+	504	protein_coding	hypothetical protein&&-- && -	-	531	588	691	253	242	186	155.559	196.33	227.179	87.9708	86.116	77.0829
Rv2267c	712.403	812.423	817.398	107.171	150.974	105.722	-2.68259	1.16e-60	1.3e-58	Rv2267c	NC_000962.3	2541644	2542810	-	1167	protein_coding	hypothetical protein&&sp|P64964|STF3_MYCBO PAPS-dependent sulfotransferase Stf3 OS=Mycobacterium bovis (strain ATCC BAA-935 / AF2122/97) OX=233413 GN=stf3 PE=3 SV=1 && PF13469:Sulfotransferase family	-	838	839	853	106	147	88	106.024	120.985	121.115	15.9178	22.5915	15.7502
Rv2268c	561.931	677.826	683.241	234.562	262.921	258.298	-1.34718	7.34e-21	1.3e-19	cyp128	NC_000962.3	2542807	2544276	-	1470	protein_coding	cytochrome P450 Cyp128&&sp|P63714|CP128_MYCBO Putative cytochrome P450 128 OS=Mycobacterium bovis (strain ATCC BAA-935 / AF2122/97) OX=233413 GN=cyp128 PE=3 SV=1 && PF00067:Cytochrome P450	p450	661	700	713	232	256	215	66.3918	80.1346	80.3698	27.6579	31.2336	30.549
Rv2281	1522.57	1522.2	1576.34	572.251	566.923	557.443	-1.44529	5.28e-40	2.7e-38	pitB	NC_000962.3	2553173	2554831	+	1659	protein_coding	phosphate permease&&sp|P9WIA4|Y2281_MYCTO Putative phosphate permease MT2339 OS=Mycobacterium tuberculosis (strain CDC 1551 / Oshkosh) OX=83331 GN=MT2339 PE=3 SV=1 && PF01384:Phosphate transporter family	-	1791	1572	1645	566	552	464	159.397	159.458	164.301	59.7886	59.6749	58.418
Rv2323c	270.339	276.94	319.101	696.609	579.247	659.561	1.16016	1.79e-16	2.26e-15	Rv2323c	NC_000962.3	2595361	2596269	-	909	protein_coding	hypothetical protein&&sp|P71889|DDAH_MYCTU N(G),N(G)-dimethylarginine dimethylaminohydrolase OS=Mycobacterium tuberculosis (strain ATCC 25618 / H37Rv) OX=83332 GN=Rv2323c PE=1 SV=1 && PF02274:Amidinotransferase	-	318	286	333	689	564	549	51.6528	52.9471	60.7017	132.832	111.279	126.149
Rv2326c	1262.43	1272.38	1336.78	2862.27	2474.12	2496.48	1.01692	7e-21	1.25e-19	Rv2326c	NC_000962.3	2597854	2599947	-	2094	protein_coding	ABC transporter ATP-binding protein&&sp|P9WQI6|Y2326_MYCTO Uncharacterized ABC transporter ATP-binding protein MT2388 OS=Mycobacterium tuberculosis (strain CDC 1551 / Oshkosh) OX=83331 GN=MT2388 PE=3 SV=1 && PF00005:ABC transporter	ABC_tran	1485	1314	1395	2831	2409	2078	104.708	105.599	110.387	236.925	206.328	207.274
Rv2327	231.233	199.474	242.44	546.975	593.625	705.213	1.45336	1.1e-21	2.09e-20	Rv2327	NC_000962.3	2599988	2600479	+	492	protein_coding	hypothetical protein&&-- && PF01047:MarR family	MarR	272	206	253	541	578	587	81.627	70.4599	85.2071	192.7	210.699	249.2
Rv2329c	4143.5	4169.6	3528.32	813.89	951.033	851.782	-2.17792	7.95e-78	1.57e-75	narK1	NC_000962.3	2601914	2603461	-	1548	protein_coding	nitrate/nitrite transporter&&sp|P10903|NARK_ECOLI Nitrate/nitrite transporter NarK OS=Escherichia coli (strain K12) OX=83333 GN=narK PE=1 SV=2 && PF07690:Major Facilitator Superfamily	MFS_1	4874	4306	3682	805	926	709	464.884	468.104	394.124	91.1325	107.285	95.6645
Rv2331	307.744	233.366	292.27	50.5522	67.7842	66.0762	-2.18016	2.11e-25	4.88e-24	Rv2331	NC_000962.3	2604297	2604683	+	387	protein_coding	hypothetical protein&&sp|P9WLB2|Y2331_MYCTO Uncharacterized protein MT2393 OS=Mycobacterium tuberculosis (strain CDC 1551 / Oshkosh) OX=83331 GN=MT2393 PE=4 SV=1 && -	-	362	241	305	50	66	55	138.111	104.796	130.59	22.6416	30.5866	29.6843
Rv2331A	284.791	277.909	319.101	93.016	78.0545	75.6873	-1.83407	7.44e-23	1.52e-21	Rv2331A	NC_000962.3	2604740	2605078	+	339	protein_coding	hypothetical protein&&-- && -	-	335	287	333	92	76	63	145.907	142.469	162.766	47.5594	40.208	38.8165
Rv2332	857.774	820.169	835.605	381.164	392.327	277.52	-1.2549	4.42e-18	6.22e-17	mez	NC_000962.3	2605108	2606754	+	1647	protein_coding	malate oxidoreductase&&sp|P9WK24|MAOX_MYCTO Putative malate oxidoreductase [NAD] OS=Mycobacterium tuberculosis (strain CDC 1551 / Oshkosh) OX=83331 GN=mez PE=3 SV=1 && PF03949:Malic enzyme, NAD binding domain|PF00390:Malic enzyme, N-terminal domain	Malic_M	1009	847	872	377	382	231	90.454	86.5425	87.729	40.114	41.5976	29.295
Rv2346c	37.4054	58.0994	71.8697	22.243	22.5947	19.2222	-1.37829	0.000189535	0.000605049	esxO	NC_000962.3	2625888	2626172	-	285	protein_coding	ESAT-6 like protein EsxO&&sp|P9WNI6|ESXO_MYCTO ESAT-6-like protein EsxO OS=Mycobacterium tuberculosis (strain CDC 1551 / Oshkosh) OX=83331 GN=esxO PE=3 SV=1 && PF06013:Proteins of 100 residues with WXG	-	44	60	75	22	22	16	22.7949	35.4279	43.6051	13.5278	13.8445	11.726
Rv2353c	306.044	314.705	275.021	79.8725	137.622	94.9095	-1.51827	4.74e-14	4.95e-13	PPE39	NC_000962.3	2634528	2635592	-	1065	protein_coding	PPE family protein PPE39&&-- && PF01469:Pentapeptide repeats (8 copies)	-	360	325	287	79	134	79	49.9095	51.3539	44.6532	12.9995	22.566	15.4936
Rv2372c	796.565	716.559	783.859	1667.21	1680.23	1704.77	1.13673	8.1e-26	1.98e-24	Rv2372c	NC_000962.3	2652037	2652825	-	789	protein_coding	rRNA small subunit methyltransferase E&&sp|P67203|RSME_MYCBO Ribosomal RNA small subunit methyltransferase E OS=Mycobacterium bovis (strain ATCC BAA-935 / AF2122/97) OX=233413 GN=rsmE PE=3 SV=1 && PF04452:RNA methyltransferase	-	937	740	818	1649	1636	1419	175.345	157.832	171.79	366.262	371.882	375.648
Rv2373c	1604.18	1684.88	1538.01	3277.8	3015.37	3583.73	1.03267	2.18e-21	4.01e-20	dnaJ2	NC_000962.3	2652839	2653987	-	1149	protein_coding	chaperone protein DnaJ&&sp|P63967|DNAJ2_MYCBO Chaperone protein DnaJ 2 OS=Mycobacterium bovis (strain ATCC BAA-935 / AF2122/97) OX=233413 GN=dnaJ2 PE=3 SV=1 && PF00226:DnaJ domain|PF00684:DnaJ central domain|PF01556:DnaJ C terminal domain	DnaJ_C	1887	1740	1605	3242	2936	2983	242.483	254.841	231.46	494.472	458.284	542.261
Rv2395B	1889.82	1770.09	1760.33	394.307	566.923	418.082	-1.97359	5.7e-45	3.52e-43	aprB	NC_000962.3	2692551	2692715	+	165	protein_coding	acid and phagosome regulated protein AprB&&-- && -	-	2223	1828	1837	390	552	348	1989.23	1864.37	1844.78	414.218	600.004	440.525
Rv2396	4689.28	4681.84	5214.86	1921.99	2246.12	2002.71	-1.24091	1.29e-30	4.4e-29	PE_PGRS41	NC_000962.3	2692799	2693884	+	1086	protein_coding	acid and phagosome regulated protein AprC&&sp|P9WIF2|PG34_MYCTO Uncharacterized PE-PGRS family protein PE_PGRS34 OS=Mycobacterium tuberculosis (strain CDC 1551 / Oshkosh) OX=83331 GN=PE_PGRS34 PE=3 SV=1 && PF00934:PE family	-	5516	4835	5442	1901	2187	1667	749.937	749.215	830.327	306.761	361.175	320.613
Rv2428	4322.02	4468.81	4553.66	2060.51	2006.82	1989.49	-1.13946	9.85e-33	3.74e-31	ahpC	NC_000962.3	2726193	2726780	+	588	protein_coding	alkyl hydroperoxide reductase subunit AhpC&&sp|P9WQB6|AHPC_MYCTO Alkyl hydroperoxide reductase C OS=Mycobacterium tuberculosis (strain CDC 1551 / Oshkosh) OX=83331 GN=ahpC PE=3 SV=1 && PF00578:AhpC/TSA family	-	5084	4615	4752	2038	1954	1656	1276.61	1320.79	1339.12	607.401	596	588.245
Rv2429	2284.28	2218.43	2189.63	830.067	959.249	905.845	-1.31237	8.62e-34	3.5e-32	ahpD	NC_000962.3	2726806	2727339	+	534	protein_coding	alkyl hydroperoxide reductase AphD&&sp|P0A5N5|AHPD_MYCBO Alkyl hydroperoxide reductase AhpD OS=Mycobacterium bovis (strain ATCC BAA-935 / AF2122/97) OX=233413 GN=ahpD PE=3 SV=1 && PF02627:Carboxymuconolactone decarboxylase family	CMD	2687	2291	2285	821	934	754	742.945	721.977	709.031	269.433	313.693	294.921
Rv2444c	5739.18	4997.51	5388.31	12811.9	10887.6	13269.3	1.19687	4.5e-27	1.21e-25	rne	NC_000962.3	2742123	2744984	-	2862	protein_coding	ribonuclease E&&sp|A0R152|RNE_MYCS2 Ribonuclease E OS=Mycolicibacterium smegmatis (strain ATCC 700084 / mc(2)155) OX=246196 GN=rne PE=3 SV=1 && PF10150:Ribonuclease E/G family	-	6751	5161	5623	12672	10601	11045	348.28	303.462	325.551	775.933	664.318	806.068
Rv2449c	781.263	653.618	717.739	1864.37	1548.77	1347.95	1.14535	9.8e-17	1.26e-15	Rv2449c	NC_000962.3	2750313	2751572	-	1260	protein_coding	trans-acting enoyl reductase&&sp|O53176|Y2449_MYCTU Putative trans-acting enoyl reductase Rv2449c OS=Mycobacterium tuberculosis (strain ATCC 25618 / H37Rv) OX=83332 GN=Rv2449c PE=1 SV=3 && PF03435:Saccharopine dehydrogenase NADP binding domain	Saccharop_dh	919	675	749	1844	1508	1122	107.69	90.1515	98.499	256.471	214.649	185.993
Rv2481c	110.516	115.23	119.783	34.3755	68.8112	66.0762	-1.03453	0.000101667	0.000343097	Rv2481c	NC_000962.3	2786575	2786898	-	324	protein_coding	hypothetical protein&&-- && -	-	130	119	125	34	67	55	59.2419	61.8076	63.9272	18.39	37.0876	35.4563
Rv2506	143.671	182.045	196.444	386.219	327.624	561.047	1.28724	1.37e-10	1.05e-09	Rv2506	NC_000962.3	2821712	2822359	+	648	protein_coding	TetR family transcriptional regulator&&-- && PF17932:Tetracyclin repressor-like, C-terminal domain|PF00440:Bacterial regulatory proteins, tetR family	TetR_N	169	188	205	382	319	467	38.5072	48.8228	52.4203	103.309	88.2906	150.528
Rv2516c	205.73	185.918	214.651	461.036	463.192	961.109	1.63451	7.88e-13	7.54e-12	Rv2516c	NC_000962.3	2832710	2833513	-	804	protein_coding	hypothetical protein&&-- && -	-	242	192	224	456	451	800	44.4416	40.1869	46.165	99.3933	100.605	207.831
Rv2526	178.526	209.158	177.279	428.683	522.76	564.651	1.42373	3.9e-19	5.98e-18	vapB17	NC_000962.3	2851091	2851318	+	228	protein_coding	antitoxin VapB17&&sp|P9WJ48|VPB17_MYCTO Putative antitoxin VapB17 OS=Mycobacterium tuberculosis (strain CDC 1551 / Oshkosh) OX=83331 GN=vapB17 PE=3 SV=1 && PF09957:Bacterial antitoxin of type II TA system, VapB	-	210	216	185	424	509	470	135.992	159.426	134.449	325.896	400.389	430.565
Rv2527	222.732	193.665	200.277	624.825	581.301	681.186	1.6115	1.17e-29	3.73e-28	vapC17	NC_000962.3	2851315	2851716	+	402	protein_coding	ribonuclease VapC17&&sp|P9WF94|VPC17_MYCTO Ribonuclease VapC17 OS=Mycobacterium tuberculosis (strain CDC 1551 / Oshkosh) OX=83331 GN=vapC17 PE=3 SV=1 && -	-	262	200	209	618	566	567	96.2289	83.7228	86.1471	269.408	252.516	294.6
Rv2539c	419.11	397.981	508.837	1003.97	794.924	952.699	1.05341	1.39e-13	1.42e-12	aroK	NC_000962.3	2862673	2863203	-	531	protein_coding	shikimate kinase&&sp|P0A4Z3|AROK_MYCBO Shikimate kinase OS=Mycobacterium bovis (strain ATCC BAA-935 / AF2122/97) OX=233413 GN=aroK PE=3 SV=1 && PF01202:Shikimate kinase	SKI	493	411	531	993	774	793	137.083	130.253	165.699	327.72	261.424	311.928
Rv2540c	1735.95	1456.36	1678.88	4082.6	3482.67	3830.02	1.22582	5.26e-27	1.39e-25	aroF	NC_000962.3	2863207	2864412	-	1206	protein_coding	chorismate synthase&&sp|P63612|AROC_MYCBO Chorismate synthase OS=Mycobacterium bovis (strain ATCC BAA-935 / AF2122/97) OX=233413 GN=aroC PE=3 SV=1 && PF01264:Chorismate synthase	-	2042	1504	1752	4038	3391	3188	249.999	209.865	240.717	586.769	504.289	552.136
Rv2560	1476.66	1446.67	1566.76	569.218	719.951	468.54	-1.35126	1.45e-20	2.51e-19	Rv2560	NC_000962.3	2880075	2881052	+	978	protein_coding	hypothetical protein&&sp|P9WLA1|Y2560_MYCTU Uncharacterized protein Rv2560 OS=Mycobacterium tuberculosis (strain ATCC 25618 / H37Rv) OX=83332 GN=Rv2560 PE=1 SV=1 && -	-	1737	1494	1635	563	701	390	262.235	257.07	277.012	100.883	128.552	83.2916
Rv2578c	122.418	88.1174	92.9514	206.253	202.326	222.256	1.05083	7.81e-08	4.27e-07	Rv2578c	NC_000962.3	2902509	2903531	-	1023	protein_coding	hypothetical protein&&sp|P9WL78|Y2578_MYCTO Uncharacterized protein MT2655 OS=Mycobacterium tuberculosis (strain CDC 1551 / Oshkosh) OX=83331 GN=MT2655 PE=4 SV=1 && PF04055:Radical SAM superfamily	Radical_SAM	144	91	97	204	197	185	20.7834	14.9694	15.7115	34.9464	34.5374	37.7721
Rv2620c	1199.52	1171.67	1099.13	2448.75	3015.37	2504.89	1.19933	1.43e-24	3.22e-23	Rv2620c	NC_000962.3	2947462	2947887	-	426	protein_coding	transmembrane protein&&-- && -	-	1411	1210	1147	2422	2936	2085	489.044	477.986	446.143	996.352	1236.08	1022.28
Rv2621c	1863.47	1666.48	1698.04	4083.61	5496.68	4913.67	1.47088	1.85e-32	6.89e-31	Rv2621c	NC_000962.3	2947884	2948558	-	675	protein_coding	transcriptional regulator&&-- && PF12840:Helix-turn-helix domain	-	2192	1721	1772	4039	5352	4090	479.476	429.059	434.991	1048.62	1422.04	1265.6
Rv2641	255.887	224.651	225.192	378.13	553.571	1003.16	1.45427	0.000512105	0.00148878	cadI	NC_000962.3	2965939	2966397	+	459	protein_coding	cadmium inducible protein CadI&&sp|P0A5N7|CADI_MYCBO Cadmium-induced protein CadI OS=Mycobacterium bovis (strain ATCC BAA-935 / AF2122/97) OX=233413 GN=cadI PE=1 SV=2 && PF00903:Glyoxalase/Bleomycin resistance protein/Dioxygenase superfamily	Glyoxalase	301	232	235	374	539	835	96.8242	85.058	84.8351	142.793	210.608	379.97
Rv2642	82.4619	91.0223	94.868	153.679	216.704	277.52	1.26929	1.75e-08	1.04e-07	Rv2642	NC_000962.3	2966533	2966913	+	381	protein_coding	ArsR family transcriptional regulator&&sp|Q58721|Y1325_METJA Uncharacterized HTH-type transcriptional regulator MJ1325 OS=Methanocaldococcus jannaschii (strain ATCC 43067 / DSM 2661 / JAL-1 / JCM 10045 / NBRC 100440) OX=243232 GN=MJ1325 PE=4 SV=1 && PF01022:Bacterial regulatory protein, arsR family	HTH_5	97	94	99	152	211	231	37.5904	41.5186	43.0557	69.9145	99.3245	126.638
Rv2643	147.071	110.389	99.6593	243.662	415.949	295.541	1.41678	6.2e-11	4.94e-10	arsC	NC_000962.3	2966910	2968406	+	1497	protein_coding	arsenic-transport integral membrane protein ArsC&&sp|Q8NQC8|ACR3_CORGL Arsenical-resistance protein Acr3 OS=Corynebacterium glutamicum (strain ATCC 13032 / DSM 20300 / BCRC 11384 / JCM 1318 / LMG 3730 / NCIMB 10025) OX=196627 GN=acr3 PE=1 SV=2 && PF01451:Low molecular weight phosphotyrosine protein phosphatase|PF01758:Sodium Bile acid symporter family	LMWPc	173	114	104	241	405	246	17.063	12.8151	11.5115	28.2126	48.5213	34.3233
Rv2720	535.577	438.65	494.463	1662.16	2134.18	3302.61	2.27206	3.43e-33	1.34e-31	lexA	NC_000962.3	3031788	3032498	+	711	protein_coding	repressor LexA&&sp|A5U672|LEXA_MYCTA LexA repressor OS=Mycobacterium tuberculosis (strain ATCC 25177 / H37Ra) OX=419947 GN=lexA PE=3 SV=2 && PF00717:Peptidase S24-like|PF01726:LexA DNA binding domain	LexA_DNA_bind	630	453	516	1644	2078	2749	130.828	107.218	120.254	405.21	524.173	807.571
Rv2721c	3277.22	3771.62	3212.1	1133.38	1548.77	1339.54	-1.35129	2.05e-25	4.77e-24	Rv2721c	NC_000962.3	3032520	3034619	-	2100	protein_coding	hypothetical protein&&-- && PF08310:LGFP repeat	-	3855	3895	3352	1121	1508	1115	271.041	312.124	264.487	93.5481	128.79	110.9
Rv2736c	530.476	559.691	511.712	680.433	953.087	1639.89	1.03064	0.00639335	0.0145141	recX	NC_000962.3	3048562	3049086	-	525	protein_coding	regulatory protein RecX&&sp|P0A5U9|RECX_MYCBO Regulatory protein RecX OS=Mycobacterium bovis (strain ATCC BAA-935 / AF2122/97) OX=233413 GN=recX PE=3 SV=1 && PF02631:RecX family	-	624	578	534	673	928	1365	175.491	185.271	168.54	224.649	317.021	543.061
Rv2744c	5367.67	5287.04	4828.68	9979	10648.3	11270.2	1.0426	3.33e-25	7.59e-24	35kd_ag	NC_000962.3	3057251	3058063	-	813	protein_coding	hypothetical protein&&sp|A5U697|PSPA_MYCTA PspA protein OS=Mycobacterium tuberculosis (strain ATCC 25177 / H37Ra) OX=419947 GN=pspA PE=3 SV=1 && PF04012:PspA/IM30 family	-	6314	5460	5039	9870	10368	9381	1146.69	1130.16	1027.01	2127.53	2287.2	2410.09
Rv2745c	1974.83	2149.68	1866.7	4179.66	4362.84	5009.78	1.17743	1.01e-25	2.41e-24	clgR	NC_000962.3	3058193	3058531	-	339	protein_coding	transcriptional regulator ClgR&&sp|P9WMH6|CLGR_MYCTO Transcriptional regulator ClgR OS=Mycobacterium tuberculosis (strain CDC 1551 / Oshkosh) OX=83331 GN=clgR PE=2 SV=1 && PF13560:Helix-turn-helix domain	-	2323	2220	1948	4134	4248	4170	1011.77	1102.03	952.159	2137.07	2247.42	2569.28
Rv2757c	168.324	166.552	195.486	79.8725	72.9194	94.9095	-1.10227	1e-07	5.38e-07	vapC21	NC_000962.3	3070170	3070586	-	417	protein_coding	ribonuclease VapC21&&sp|P9WF90|VPC21_MYCTO Ribonuclease VapC21 OS=Mycobacterium tuberculosis (strain CDC 1551 / Oshkosh) OX=83331 GN=vapC21 PE=3 SV=1 && PF01850:PIN domain	-	198	172	204	79	71	79	70.1067	69.4116	81.0615	33.2001	30.5366	39.57
Rv2762c	213.381	280.814	269.272	105.149	156.109	114.132	-1.0213	3.02e-07	1.52e-06	Rv2762c	NC_000962.3	3072637	3073056	-	420	protein_coding	hypothetical protein&&-- && -	-	251	290	281	104	152	95	88.2378	116.195	110.861	43.3943	64.9072	47.2443
Rv2763c	967.439	1200.72	1166.21	524.732	573.085	551.436	-1.01512	1.93e-15	2.25e-14	dfrA	NC_000962.3	3073130	3073609	-	480	protein_coding	dihydrofolate reductase&&sp|P0A547|DYR_MYCBO Dihydrofolate reductase OS=Mycobacterium bovis (strain ATCC BAA-935 / AF2122/97) OX=233413 GN=folA PE=3 SV=2 && PF00186:Dihydrofolate reductase	-	1138	1240	1217	519	558	459	350.051	434.73	420.117	189.485	208.493	199.732
Rv2767c	82.4619	93.9273	97.7428	291.181	368.705	388.048	1.93524	8.12e-26	1.98e-24	Rv2767c	NC_000962.3	3076367	3076720	-	354	protein_coding	membrane protein&&-- && -	-	97	97	102	288	359	323	40.4575	46.1114	47.7438	142.573	181.882	190.579
Rv2768c	600.186	559.691	630.537	1756.18	2114.66	2373.94	1.80176	9.38e-43	5.24e-41	PPE43	NC_000962.3	3076894	3078078	-	1185	protein_coding	PPE family protein PPE43&&sp|P9WI30|PPE15_MYCTO PPE family protein PPE15 OS=Mycobacterium tuberculosis (strain CDC 1551 / Oshkosh) OX=83331 GN=PPE15 PE=3 SV=1 && PF00823:PPE family|PF12484:Polymorphic PE/PPE proteins C terminal	-	706	578	658	1737	2059	1976	87.9664	82.0822	92.0085	256.88	311.628	348.292
Rv2769c	302.644	249.827	257.773	615.726	628.545	977.928	1.45282	4.98e-16	6.08e-15	PE27	NC_000962.3	3078158	3078985	-	828	protein_coding	PE family protein PE27&&sp|P0A691|PG46_MYCBO Uncharacterized PE-PGRS family protein PE_PGRS46 OS=Mycobacterium bovis (strain ATCC BAA-935 / AF2122/97) OX=233413 GN=PE_PGRS46 PE=3 SV=1 && PF12484:Polymorphic PE/PPE proteins C terminal|PF00934:PE family	-	356	258	269	609	612	814	63.4819	52.4359	53.8322	128.895	132.562	205.338
Rv2801A	95.2137	92.959	72.8279	44.4859	52.3787	30.0346	-1.03286	0.000298704	0.000909308	mazE9	NC_000962.3	3110507	3110737	-	231	protein_coding	antitoxin MazE9&&sp|P0CL61|MAZE9_MYCTU Antitoxin MazE9 OS=Mycobacterium tuberculosis (strain ATCC 25618 / H37Rv) OX=83332 GN=mazE9 PE=1 SV=1 && -	-	112	96	76	44	51	25	71.5874	69.9357	54.5158	33.3802	39.5965	22.6049
Rv2812	60.3587	48.4161	52.7044	129.414	161.244	96.1109	1.26148	7.37e-07	3.5e-06	Rv2812	NC_000962.3	3116818	3118227	+	1410	protein_coding	transposase&&-- && PF09299:Mu transposase, C-terminal|PF00665:Integrase core domain|PF13518:Helix-turn-helix domain	rve	71	50	55	128	157	80	7.4348	5.96747	6.46344	15.9089	19.9701	11.8508
Rv2817c	109.666	136.534	135.115	46.508	68.8112	57.6665	-1.13927	2.8e-06	1.23e-05	Rv2817c	NC_000962.3	3123967	3124983	-	1017	protein_coding	CRISPR-associated endonuclease Cas1&&sp|P9WPJ4|CAS1_MYCTO CRISPR-associated endonuclease Cas1 OS=Mycobacterium tuberculosis (strain CDC 1551 / Oshkosh) OX=83331 GN=cas1 PE=3 SV=1 && PF01867:CRISPR associated protein Cas1	-	129	141	141	46	67	48	18.7283	23.3312	22.973	7.92657	11.8155	9.85816
Rv2818c	288.192	315.673	252.023	136.491	93.4601	146.569	-1.1882	1.01e-09	7.02e-09	Rv2818c	NC_000962.3	3124996	3126144	-	1149	protein_coding	CRISPR-associated protein Csm6&&sp|P71635|CSM6_MYCTU CRISPR system endoribonuclease Csm6 OS=Mycobacterium tuberculosis (strain ATCC 25618 / H37Rv) OX=83332 GN=csm6 PE=1 SV=5 && PF09659:CRISPR-associated protein (Cas_Csm6)	-	339	326	263	135	91	122	43.5622	47.746	37.9277	20.5903	14.2043	22.1776
Rv2819c	467.567	412.505	341.141	133.458	156.109	153.777	-1.46398	1.99e-17	2.67e-16	Rv2819c	NC_000962.3	3126240	3127367	-	1128	protein_coding	CRISPR type III-associated RAMP protein Csm5&&sp|P9WJF4|CSM5_MYCTO CRISPR system Cms protein Csm5 OS=Mycobacterium tuberculosis (strain CDC 1551 / Oshkosh) OX=83331 GN=csm5 PE=3 SV=1 && PF03787:RAMP superfamily	-	550	426	356	132	152	128	71.9919	63.5536	52.2951	20.5075	24.1676	23.7015
Rv2820c	276.29	289.529	239.566	83.9166	112.974	118.937	-1.35466	1.34e-12	1.26e-11	Rv2820c	NC_000962.3	3127364	3128272	-	909	protein_coding	CRISPR type III-associated RAMP protein Csm4&&sp|P9WJF6|CSM4_MYCTO CRISPR system Cms protein Csm4 OS=Mycobacterium tuberculosis (strain CDC 1551 / Oshkosh) OX=83331 GN=csm4 PE=3 SV=1 && PF17953:CRISPR Csm4 C-terminal domain	-	325	299	250	83	110	99	52.7898	55.3537	45.5718	16.0016	21.7034	22.7482
Rv2821c	576.383	589.709	622.871	209.286	266.002	227.062	-1.34822	8.12e-21	1.43e-19	Rv2821c	NC_000962.3	3128253	3128963	-	711	protein_coding	CRISPR type III-associated RAMP protein Csm3&&sp|P9WJF8|CSM3_MYCTO CRISPR system Cms endoribonuclease Csm3 OS=Mycobacterium tuberculosis (strain CDC 1551 / Oshkosh) OX=83331 GN=csm3 PE=3 SV=1 && PF03787:RAMP superfamily	-	678	609	650	207	259	189	140.796	144.141	151.483	51.021	65.3325	55.5223
Rv2822c	303.494	254.669	290.353	106.16	100.649	128.548	-1.34422	1.25e-13	1.29e-12	Rv2822c	NC_000962.3	3128973	3129347	-	375	protein_coding	CRISPR type III-associated protein Csm2&&sp|P9WJG0|CSM2_MYCTO CRISPR system Cms protein Csm2 OS=Mycobacterium tuberculosis (strain CDC 1551 / Oshkosh) OX=83331 GN=csm2 PE=3 SV=1 && PF03750:Csm2 Type III-A	-	357	263	303	105	98	107	140.562	118.022	133.885	49.0689	46.8699	59.5975
Rv2826c	88.4127	106.516	78.5775	331.622	352.273	420.485	2.01288	5.18e-28	1.51e-26	Rv2826c	NC_000962.3	3133709	3134593	-	885	protein_coding	hypothetical protein&&-- && PF08843:Nucleotidyl transferase AbiEii toxin, Type IV TA system	-	104	110	82	328	343	350	17.3508	20.9165	15.3529	64.95	69.5104	82.6038
Rv2827c	158.973	146.217	139.906	668.3	754.87	541.825	2.14245	5.26e-40	2.7e-38	Rv2827c	NC_000962.3	3134596	3135483	-	888	protein_coding	hypothetical protein&&-- && PF13338:Transcriptional regulator, AbiEi antitoxin|PF09407:AbiEi antitoxin C-terminal domain	-	187	151	146	661	735	451	31.0927	28.6156	27.2433	130.448	148.448	106.081
Rv2829c	199.779	202.379	228.066	641.002	816.492	1296.3	2.12642	1.34e-25	3.14e-24	vapC22	NC_000962.3	3136620	3137012	-	393	protein_coding	ribonuclease VapC22&&sp|P71623|VPC22_MYCTU Ribonuclease VapC22 OS=Mycobacterium tuberculosis (strain ATCC 25618 / H37Rv) OX=83332 GN=vapC22 PE=1 SV=1 && PF01850:PIN domain	-	235	209	238	634	795	1079	88.2888	89.4939	100.347	282.713	362.805	573.461
Rv2830c	88.4127	99.7372	101.576	262.871	385.138	473.346	1.95154	1.87e-20	3.23e-19	vapB22	NC_000962.3	3137009	3137224	-	216	protein_coding	antitoxin VapB22&&sp|P71622|VPB22_MYCTU Antitoxin VapB22 OS=Mycobacterium tuberculosis (strain ATCC 25618 / H37Rv) OX=83332 GN=vapB22 PE=1 SV=1 && PF02604:Antitoxin Phd_YefM, type II toxin-antitoxin system	-	104	103	106	260	375	394	71.0902	80.2459	81.3154	210.944	311.37	380.994
Rv2846c	1100.91	897.635	1231.37	2327.42	2620.99	6552.36	1.83206	0.000218104	0.000684619	efpA	NC_000962.3	3153039	3154631	-	1593	protein_coding	MFS-type transporter EfpA&&sp|P9WJY4|EFPA_MYCTO Uncharacterized MFS-type transporter EfpA OS=Mycobacterium tuberculosis (strain CDC 1551 / Oshkosh) OX=83331 GN=efpA PE=3 SV=1 && PF07690:Major Facilitator Superfamily	MFS_1	1295	927	1285	2302	2552	5454	120.028	97.9273	133.662	253.243	287.319	715.113
Rv2894c	1546.37	1716.84	1750.75	585.394	761.032	765.283	-1.24829	1.21e-21	2.26e-20	xerC	NC_000962.3	3203394	3204290	-	897	protein_coding	tyrosine recombinase XerC&&sp|P67629|XERC_MYCBO Tyrosine recombinase XerC OS=Mycobacterium bovis (strain ATCC BAA-935 / AF2122/97) OX=233413 GN=xerC PE=3 SV=1 && PF02899:Phage integrase, N-terminal SAM-like domain|PF00589:Phage integrase family	Phage_integrase	1819	1773	1827	579	741	637	299.413	332.626	337.494	113.119	148.158	148.328
Rv2905	2838.56	3162.54	3389.37	1243.58	1544.66	1525.76	-1.12241	3.66e-20	6.23e-19	lppW	NC_000962.3	3214628	3215572	+	945	protein_coding	lipoprotein LppW&&sp|P65305|LPPW_MYCBO Putative lipoprotein LppW OS=Mycobacterium bovis (strain ATCC BAA-935 / AF2122/97) OX=233413 GN=lppW PE=3 SV=1 && -	-	3339	3266	3537	1230	1504	1270	521.693	581.599	620.188	228.098	285.44	280.703
Rv2912c	226.133	193.665	226.15	691.554	716.869	2239.38	2.49722	1.22e-05	4.88e-05	Rv2912c	NC_000962.3	3219274	3219861	-	588	protein_coding	TetR family HTH-type transcriptional regulator&&sp|P9WMC6|Y2912_MYCTO Uncharacterized HTH-type transcriptional regulator MT2980 OS=Mycobacterium tuberculosis (strain CDC 1551 / Oshkosh) OX=83331 GN=MT2980 PE=4 SV=1 && PF00440:Bacterial regulatory proteins, tetR family	TetR_N	266	200	236	684	698	1864	66.7936	57.239	66.5051	203.858	212.901	662.131
Rv2913c	476.069	500.623	491.589	1407.37	2265.64	4488.38	2.47458	3.62e-07	1.8e-06	Rv2913c	NC_000962.3	3219863	3221698	-	1836	protein_coding	D-amino acid aminohydrolase&&sp|P9WJH8|Y2913_MYCTO Uncharacterized protein MT2981 OS=Mycobacterium tuberculosis (strain CDC 1551 / Oshkosh) OX=83331 GN=MT2981 PE=3 SV=1 && PF07969:Amidohydrolase family	-	560	517	513	1392	2206	3736	45.0345	47.3868	46.2983	132.866	215.492	425.02
Rv2917	1146.82	1195.88	1157.58	499.456	483.733	480.554	-1.25741	2.33e-28	7.03e-27	Rv2917	NC_000962.3	3226363	3228243	+	1881	protein_coding	hypothetical protein&&sp|P9WL21|Y2917_MYCTU Uncharacterized protein Rv2917 OS=Mycobacterium tuberculosis (strain ATCC 25618 / H37Rv) OX=83332 GN=Rv2917 PE=4 SV=1 && PF04851:Type III restriction enzyme, res subunit	-	1349	1235	1208	494	471	400	105.89	110.489	106.414	46.0242	44.9087	44.4167
Rv2920c	363.002	326.325	343.058	2724.76	1883.58	3132.01	2.90559	7.29e-72	1.37e-69	amt	NC_000962.3	3231073	3232506	-	1434	protein_coding	ammonium transporter integral membrane protein&&sp|P63520|AMT_MYCBO Ammonium transporter OS=Mycobacterium bovis (strain ATCC BAA-935 / AF2122/97) OX=233413 GN=amt PE=3 SV=1 && PF00909:Ammonium Transporter Family	Ammonium_transp	427	337	358	2695	1834	2607	43.9652	39.5476	41.367	329.35	229.377	379.723
Rv2929	660.545	719.464	584.54	257.816	297.84	296.742	-1.20558	2.31e-17	3.09e-16	Rv2929	NC_000962.3	3242970	3243281	+	312	protein_coding	hypothetical protein&&sp|P9WL12|Y2929_MYCTO Uncharacterized protein MT2998.1 OS=Mycobacterium tuberculosis (strain CDC 1551 / Oshkosh) OX=83331 GN=MT2998.1 PE=3 SV=1 && -	-	777	743	610	255	290	247	367.703	400.75	323.963	143.23	166.703	165.355
Rv2946c	5938.96	6010.38	5933.56	13975.7	12804	12770.7	1.14516	2.83e-34	1.19e-32	pks1	NC_000962.3	3291503	3296353	-	4851	protein_coding	polyketide synthase&&sp|P96285|PKS1_MYCTU Putative inactive phenolphthiocerol synthesis polyketide synthase type I Pks1 OS=Mycobacterium tuberculosis (strain ATCC 25618 / H37Rv) OX=83332 GN=pks1 PE=1 SV=4 && PF13602:Zinc-binding dehydrogenase|PF08659:KR domain|PF00550:Phosphopantetheine attachment site|PF14765:Polyketide synthase dehydratase|PF08240:Alcohol dehydrogenase GroES-like domain|PF00698…	Acyl_transf_1	6986	6207	6192	13823	12467	10630	212.631	215.323	211.505	499.367	460.924	457.696
Rv2947c	328.147	390.234	402.47	806.813	710.707	957.504	1.14284	8.06e-15	8.87e-14	pks15	NC_000962.3	3296350	3297840	-	1491	protein_coding	polyketide synthase&&sp|P96284|PKS15_MYCTU Putative inactive phenolphthiocerol synthesis polyketide synthase type I Pks15 OS=Mycobacterium tuberculosis (strain ATCC 25618 / H37Rv) OX=83332 GN=pks15 PE=1 SV=2 && PF16197:Ketoacyl-synthetase C-terminal extension|PF02801:Beta-ketoacyl synthase, C-terminal domain|PF00109:Beta-ketoacyl synthase, N-terminal domain|PF08990:Erythronolide synthase docking	ketoacyl-synt	386	403	420	798	692	797	38.2243	45.4849	46.6758	93.7937	83.2391	111.649
Rv2963	234.634	215.936	250.106	345.777	466.273	639.137	1.04802	6.15e-08	3.4e-07	Rv2963	NC_000962.3	3315236	3316456	+	1221	protein_coding	integral membrane protein&&sp|I6YET7|Y2963_MYCTU Putative permease Rv2963 OS=Mycobacterium tuberculosis (strain ATCC 25618 / H37Rv) OX=83332 GN=Rv2963 PE=1 SV=1 && PF03773:Predicted permease	-	276	223	261	342	454	532	33.3752	30.7347	35.4197	49.0861	66.6867	91.0063
Rv2985	812.717	755.292	752.236	332.633	420.057	325.576	-1.10448	1.57e-15	1.84e-14	mutT1	NC_000962.3	3342165	3343118	+	954	protein_coding	8-oxo-dGTP diphosphatase&&sp|P9WIY2|MUTT1_MYCTO 8-oxo-(d)GTP phosphatase OS=Mycobacterium tuberculosis (strain CDC 1551 / Oshkosh) OX=83331 GN=mutT1 PE=3 SV=1 && PF00300:Histidine phosphatase superfamily (branch 1)|PF00293:NUDIX domain	NUDIX	956	780	785	329	409	271	147.958	137.59	136.346	60.436	76.8907	59.333
Rv2990c	403.808	303.085	355.515	819.957	763.086	707.616	1.10755	4.99e-15	5.55e-14	Rv2990c	NC_000962.3	3346859	3347719	-	861	protein_coding	hypothetical protein&&-- && -	-	475	313	371	811	743	589	81.4556	61.176	71.3988	165.069	154.769	142.885
Rv3013	220.182	225.619	222.317	749.184	673.734	827.755	1.75146	1.64e-36	7.53e-35	Rv3013	NC_000962.3	3371815	3372471	+	657	protein_coding	hypothetical protein&&-- && -	-	259	233	232	741	656	689	58.2056	59.6802	58.5117	197.652	179.076	219.043
Rv3026c	943.636	904.413	933.348	240.628	326.597	189.819	-1.87368	7.13e-30	2.32e-28	Rv3026c	NC_000962.3	3385163	3386077	-	915	protein_coding	hypothetical protein&&-- && PF01553:Acyltransferase	Acyltransferase	1110	934	974	238	318	158	179.115	171.777	176.384	45.5831	62.3311	36.0671
Rv3027c	788.914	805.645	750.319	326.567	384.111	218.652	-1.33163	4.33e-15	4.85e-14	Rv3027c	NC_000962.3	3386074	3386919	-	846	protein_coding	GCN5-like N-acetyltransferase&&sp|Q9HW51|OLSB_PSEAE L-ornithine N(alpha)-acyltransferase OS=Pseudomonas aeruginosa (strain ATCC 15692 / DSM 22644 / CIP 104116 / JCM 14847 / LMG 12228 / 1C / PRS 101 / PAO1) OX=208964 GN=olsB PE=2 SV=1 && PF13444:Acetyltransferase (GNAT) domain	-	928	832	783	323	374	182	161.96	165.498	153.36	66.9084	79.2866	44.9341
Rv3049c	3526.31	3313.6	3446.87	7427.13	6542.2	7463.01	1.05887	1.17e-25	2.77e-24	Rv3049c	NC_000962.3	3409509	3411083	-	1575	protein_coding	monooxygenase&&sp|Q9I3H5|BVMO_PSEAE Baeyer-Villiger monooxygenase OS=Pseudomonas aeruginosa (strain ATCC 15692 / DSM 22644 / CIP 104116 / JCM 14847 / LMG 12228 / 1C / PRS 101 / PAO1) OX=208964 GN=PA1538 PE=1 SV=1 && PF00743:Flavin-binding monooxygenase-like	FMO-like	4148	3422	3597	7346	6370	6212	388.856	365.628	378.425	817.37	725.367	823.808
Rv3054c	81.6118	78.4341	82.4106	105.149	195.136	204.236	1.05406	2.13e-05	8.18e-05	Rv3054c	NC_000962.3	3415435	3415989	-	555	protein_coding	hypothetical protein&&sp|D3KVM6|HBQR_BURSP 2-hydroxy-1,4-benzoquinone reductase OS=Burkholderia sp. OX=36773 PE=1 SV=1 && PF03358:NADPH-dependent FMN reductase	FMN_red	96	81	86	104	190	170	25.5393	24.5602	25.6759	32.8389	61.3987	63.9781
Rv3060c	381.705	311.8	321.018	1068.67	1146.17	2072.39	2.07756	5.21e-25	1.18e-23	Rv3060c	NC_000962.3	3421741	3423213	-	1473	protein_coding	GntR family transcriptional regulator&&-- && PF00392:Bacterial regulatory proteins, gntR family|PF07729:FCD domain	FCD	449	322	335	1057	1116	1725	45.0064	36.7869	37.6845	125.754	135.881	244.603
Rv3061c	370.653	331.166	301.853	1167.76	1134.87	1902.99	2.06533	1.61e-30	5.47e-29	fadE22	NC_000962.3	3423262	3425427	-	2166	protein_coding	acyl-CoA dehydrogenase FadE22&&sp|P96855|CHSE3_MYCTU Acyl-CoA dehydrogenase FadE34 OS=Mycobacterium tuberculosis (strain ATCC 25618 / H37Rv) OX=83332 GN=fadE34 PE=1 SV=2 && PF02771:Acyl-CoA dehydrogenase, N-terminal domain|PF02770:Acyl-CoA dehydrogenase, middle domain|PF00441:Acyl-CoA dehydrogenase, C-terminal domain	-	436	342	315	1155	1105	1584	29.7207	26.571	24.0975	93.4484	91.4961	152.747
Rv3065	94.3636	71.6559	83.3688	145.59	217.731	218.652	1.21812	3.62e-08	2.06e-07	mmr	NC_000962.3	3430387	3430710	+	324	protein_coding	multidrug resistance protein Mmr&&sp|P69927|MMR_MYCBO Multidrug resistance protein mmr OS=Mycobacterium bovis (strain ATCC BAA-935 / AF2122/97) OX=233413 GN=mmr PE=3 SV=1 && PF00893:Small Multidrug Resistance protein	-	111	74	87	144	212	182	50.5834	38.435	44.4933	77.8872	117.352	117.328
Rv3066	112.216	115.23	99.6593	213.33	268.056	288.333	1.23221	5.5e-11	4.44e-10	Rv3066	NC_000962.3	3430707	3431315	+	609	protein_coding	DeoR family transcriptional regulator&&-- && PF00440:Bacterial regulatory proteins, tetR family	TetR_N	132	119	104	211	261	240	32.0027	32.8828	28.2967	60.7175	76.8638	82.3132
Rv3074	310.295	268.225	245.315	946.337	1148.22	1558.2	2.14642	1.06e-35	4.61e-34	Rv3074	NC_000962.3	3436779	3438053	+	1275	protein_coding	hypothetical protein&&-- && PF02720:Domain of unknown function (DUF222)	DUF222	365	277	256	936	1118	1297	42.2681	36.5603	33.2698	128.651	157.264	212.474
Rv3078	323.897	357.311	385.221	162.778	175.623	138.159	-1.15818	2.62e-12	2.4e-11	hab	NC_000962.3	3441353	3441754	+	402	protein_coding	hydroxylaminobenzene mutase&&sp|O52214|HABA_PSEOL Hydroxylaminobenzene mutase HabA OS=Pseudomonas oleovorans OX=301 GN=habA PE=1 SV=1 && -	-	381	369	402	161	171	115	139.936	154.469	165.699	70.1856	76.2902	59.7513
Rv3092c	356.201	379.583	421.635	1049.46	947.952	1213.4	1.47192	2.91e-27	8.02e-26	Rv3092c	NC_000962.3	3460814	3461734	-	921	protein_coding	integral membrane protein&&sp|P46125|YEDI_ECOLI Inner membrane protein YedI OS=Escherichia coli (strain K12) OX=83333 GN=yedI PE=1 SV=2 && PF05661:Protein of unknown function (DUF808)	-	419	392	440	1038	923	1010	67.1714	71.6252	79.1614	197.509	179.738	229.054
Rv3093c	289.042	238.207	345.933	1746.07	1409.09	2671.88	2.73772	1.36e-44	8.14e-43	Rv3093c	NC_000962.3	3461760	3462764	-	1005	protein_coding	oxidoreductase&&-- && PF00296:Luciferase-like monooxygenase	-	340	246	361	1727	1372	2224	49.9509	41.1916	59.5198	301.144	244.843	462.215
Rv3094c	203.179	211.094	205.068	1618.68	1480.98	2346.31	3.13581	3.16e-80	6.87e-78	Rv3094c	NC_000962.3	3462761	3463891	-	1131	protein_coding	hypothetical protein&&sp|P9WJA0|HSAA_MYCTO Flavin-dependent monooxygenase, oxygenase subunit HsaA OS=Mycobacterium tuberculosis (strain CDC 1551 / Oshkosh) OX=83331 GN=hsaA PE=3 SV=1 && PF08028:Acyl-CoA dehydrogenase, C-terminal domain	Acyl-CoA_dh_2	239	218	214	1601	1442	1953	31.2008	32.4365	31.3525	248.072	228.666	360.674
Rv3095	127.518	122.977	134.157	398.351	426.219	564.651	1.85053	2.66e-26	6.74e-25	Rv3095	NC_000962.3	3463973	3464449	+	477	protein_coding	HTH-type transcriptional regulator&&sp|P9WMG3|Y3095_MYCTU Uncharacterized HTH-type transcriptional regulator Rv3095 OS=Mycobacterium tuberculosis (strain ATCC 25618 / H37Rv) OX=83332 GN=Rv3095 PE=1 SV=1 && PF01638:HxlR-like helix-turn-helix	DUF24	150	127	140	394	415	470	46.4305	44.8048	48.6329	144.753	156.037	205.804
Rv3109	32.3047	61.9727	38.3305	4.04418	16.4325	10.8125	-2.08422	1.66e-05	6.46e-05	moaA1	NC_000962.3	3477649	3478728	+	1080	protein_coding	cyclic pyranopterin monophosphate synthase&&sp|P9WJS2|MOAA1_MYCTO GTP 3',8-cyclase 1 OS=Mycobacterium tuberculosis (strain CDC 1551 / Oshkosh) OX=83331 GN=moaA1 PE=3 SV=1 && PF04055:Radical SAM superfamily|PF06463:Molybdenum Cofactor Synthesis C	Radical_SAM	38	64	40	4	16	9	5.19505	9.97231	6.13701	0.64906	2.65702	1.74058
Rv3110	21.2531	43.5745	12.4574	2.02209	6.1622	6.00693	-2.45669	0.000215206	0.000678096	moaB1	NC_000962.3	3478779	3479174	+	396	protein_coding	pterin-4-alpha-carbinolamine dehydratase&&sp|Q7NVH7|PHS_CHRVO Putative pterin-4-alpha-carbinolamine dehydratase OS=Chromobacterium violaceum (strain ATCC 12472 / DSM 30191 / JCM 1249 / NBRC 12614 / NCIMB 9131 / NCTC 9757) OX=243365 GN=CV_2366 PE=3 SV=1 && PF01329:Pterin 4 alpha carbinolamine dehydratase	-	25	45	13	2	6	5	9.32127	19.123	5.43962	0.885081	2.71741	2.63724
Rv3111	17.8526	26.1447	24.9148	8.08835	7.18923	0	-2.12852	0.000931722	0.00254913	moaC1	NC_000962.3	3479171	3479683	+	513	protein_coding	cyclic pyranopterin monophosphate synthase accessory protein&&sp|P0A5K5|MOAC1_MYCBO Cyclic pyranopterin monophosphate synthase 1 OS=Mycobacterium bovis (strain ATCC BAA-935 / AF2122/97) OX=233413 GN=moaC1 PE=3 SV=1 && PF01967:MoaC family	-	21	27	26	8	7	0	6.04411	8.85699	8.39801	2.73288	2.44726	0
Rv3112	22.9533	26.1447	24.9148	9.0994	10.2703	7.20831	-1.46904	0.00417185	0.00988901	moaD1	NC_000962.3	3479700	3479951	+	252	protein_coding	molybdenum cofactor biosynthesis protein MoaD&&sp|L7N6B4|MOAD_MYCTU Molybdopterin synthase sulfur carrier subunit OS=Mycobacterium tuberculosis (strain ATCC 25618 / H37Rv) OX=83332 GN=moaD1 PE=3 SV=1 && PF02597:ThiS family	ThiS	27	27	26	9	10	6	15.8195	18.0303	17.0959	6.25879	7.11702	4.97309
Rv3113	22.9533	35.8279	31.6227	6.06626	7.18923	15.618	-1.66858	0.00103844	0.00281503	Rv3113	NC_000962.3	3480074	3480742	+	669	protein_coding	phosphatase&&-- && PF13419:Haloacid dehalogenase-like hydrolase	-	27	37	33	6	7	13	5.95893	9.30712	8.1735	1.57171	1.8766	4.05875
Rv3114	36.5553	43.5745	26.8313	12.1325	18.4866	9.61109	-1.40113	0.00165838	0.00431178	Rv3114	NC_000962.3	3480759	3481289	+	531	protein_coding	hypothetical protein&&-- && PF00383:Cytidine and deoxycytidylate deaminase zinc-binding region	-	43	45	28	12	18	8	11.9565	14.2613	8.73743	3.96036	6.07962	3.14681
Rv3121	734.506	790.151	780.026	302.302	308.11	360.416	-1.24926	2.66e-21	4.85e-20	cyp141	NC_000962.3	3486509	3487711	+	1203	protein_coding	cytochrome P450 Cyp141&&sp|P9WPL7|CP141_MYCTU Putative cytochrome P450 141 OS=Mycobacterium tuberculosis (strain ATCC 25618 / H37Rv) OX=83332 GN=cyp141 PE=1 SV=1 && PF00067:Cytochrome P450	p450	864	816	814	299	300	300	106.042	114.147	112.119	43.5566	44.7254	52.0872
Rv3159c	269.489	285.655	277.896	446.881	612.112	741.255	1.11027	1.25e-10	9.62e-10	PPE53	NC_000962.3	3527391	3529163	-	1773	protein_coding	PPE family protein PPE53&&sp|P9WHX6|PPE62_MYCTO Uncharacterized PPE family protein PPE62 OS=Mycobacterium tuberculosis (strain CDC 1551 / Oshkosh) OX=83331 GN=PPE62 PE=3 SV=1 && PF00823:PPE family|PF01469:Pentapeptide repeats (8 copies)	-	317	295	290	442	596	617	26.3986	27.9997	27.1025	43.688	60.2888	72.6862
Rv3160c	131.769	175.266	171.529	1232.46	1308.44	2620.22	3.43118	3.6e-18	5.1e-17	Rv3160c	NC_000962.3	3529338	3529979	-	642	protein_coding	TetR family transcriptional regulator&&-- && PF00440:Bacterial regulatory proteins, tetR family	TetR_N	155	181	179	1219	1274	2181	35.6473	47.4442	46.1996	332.749	355.904	709.571
Rv3161c	256.737	336.976	285.562	3056.39	4008.51	7467.81	4.04696	1.38e-22	2.78e-21	Rv3161c	NC_000962.3	3529990	3531138	-	1149	protein_coding	dioxygenase&&sp|Q53122|BPHA1_RHOJR Biphenyl 2,3-dioxygenase subunit alpha OS=Rhodococcus jostii (strain RHA1) OX=101510 GN=bphA1 PE=1 SV=1 && PF00355:Rieske [2Fe-2S] domain|PF00848:Ring hydroxylating alpha subunit (catalytic domain)	-	302	348	298	3023	3903	6216	38.8076	50.9681	42.9751	461.07	609.224	1129.97
Rv3167c	44.2064	42.6062	50.7879	134.469	193.082	215.048	1.97735	5.24e-16	6.37e-15	Rv3167c	NC_000962.3	3535431	3536057	-	627	protein_coding	TetR family transcriptional regulator&&-- && PF00440:Bacterial regulatory proteins, tetR family|PF16859:Tetracyclin repressor-like, C-terminal domain	TetR_N	52	44	53	133	188	179	12.2452	11.8093	14.0065	37.1734	53.7761	59.6295
Rv3168	141.97	147.185	114.033	415.539	368.705	652.352	1.83027	8.74e-19	1.3e-17	Rv3168	NC_000962.3	3536102	3537238	+	1137	protein_coding	aminoglycoside phosphotransferase&&sp|P9WI98|Y3168_MYCTO Putative aminoglycoside phosphotransferase OS=Mycobacterium tuberculosis (strain CDC 1551 / Oshkosh) OX=83331 GN=MT3257 PE=3 SV=1 && PF01636:Phosphotransferase enzyme family	APH	167	152	119	411	359	543	21.6863	22.4969	17.3423	63.3475	56.6282	99.7504
Rv3169	235.484	214.968	244.357	506.533	586.436	776.095	1.42554	1.89e-17	2.56e-16	Rv3169	NC_000962.3	3537238	3538362	+	1125	protein_coding	hypothetical protein&&-- && -	-	277	222	255	501	571	646	36.3544	33.2078	37.5585	78.0429	91.0295	119.938
Rv3177	120.717	95.864	93.9097	195.131	285.515	197.027	1.12487	8.76e-08	4.74e-07	Rv3177	NC_000962.3	3545447	3546307	+	861	protein_coding	peroxidase&&sp|P9WNH0|BPOC_MYCTO Putative non-heme bromoperoxidase BpoC OS=Mycobacterium tuberculosis (strain CDC 1551 / Oshkosh) OX=83331 GN=bpoC PE=3 SV=1 && PF00561:alpha/beta hydrolase fold	Abhydrolase_1	142	99	98	193	278	164	24.3509	19.3496	18.8601	39.2828	57.9082	39.7847
Rv3183	22.1032	24.2081	21.0818	40.4418	40.0543	66.0762	1.1142	0.00225838	0.0057032	Rv3183	NC_000962.3	3550715	3551044	+	330	protein_coding	transcriptional regulator&&sp|O53333|HIGA3_MYCTU Putative antitoxin HigA3 OS=Mycobacterium tuberculosis (strain ATCC 25618 / H37Rv) OX=83332 GN=higA3 PE=1 SV=1 && PF13744:Helix-turn-helix domain	-	26	25	22	40	39	55	11.6329	12.7487	11.0466	21.242	21.1958	34.8116
Rv3209	1077.11	1095.17	1042.59	310.39	484.76	336.388	-1.5054	5.16e-22	9.87e-21	Rv3209	NC_000962.3	3586274	3586834	+	561	protein_coding	hypothetical protein&&-- && -	-	1267	1131	1088	307	472	280	333.46	339.265	321.356	95.9012	150.896	104.249
Rv3212	1427.36	1286.9	1522.68	3990.59	3268.02	4351.42	1.45399	2.11e-30	7.08e-29	Rv3212	NC_000962.3	3589394	3590617	+	1224	protein_coding	hypothetical protein&&-- && -	-	1679	1329	1589	3947	3182	3622	202.535	182.719	215.111	565.112	466.249	618.077
Rv3229c	1616.08	1512.52	1534.18	7062.14	7748.97	11857.7	2.51563	3.11e-56	3.06e-54	desA3	NC_000962.3	3605751	3607034	-	1284	protein_coding	stearoyl-CoA 9-desaturase&&sp|P9WNZ2|DESA3_MYCTO NADPH-dependent stearoyl-CoA 9-desaturase OS=Mycobacterium tuberculosis (strain CDC 1551 / Oshkosh) OX=83331 GN=desA3 PE=3 SV=1 && PF00487:Fatty acid desaturase	-	1901	1562	1601	6985	7545	9870	218.599	204.718	206.608	953.344	1053.88	1605.56
Rv3230c	1149.37	1186.2	1337.73	3713.56	4465.54	6415.4	1.9901	2.87e-34	1.2e-32	Rv3230c	NC_000962.3	3607112	3608254	-	1143	protein_coding	stearoyl-CoA 9-desaturase electron transfer protein&&sp|P9WNE8|DESET_MYCTO NADPH oxidoreductase OS=Mycobacterium tuberculosis (strain CDC 1551 / Oshkosh) OX=83331 GN=MT3327 PE=3 SV=1 && PF00111:2Fe-2S iron-sulfur cluster binding domain|PF00970:Oxidoreductase FAD-binding domain|PF00175:Oxidoreductase NAD-binding domain	Fer2	1352	1225	1396	3673	4348	5340	174.647	180.356	202.376	563.149	682.248	975.822
Rv3258c	1479.21	1543.51	1630.96	574.273	802.113	652.352	-1.19747	4.53e-19	6.86e-18	Rv3258c	NC_000962.3	3638811	3639302	-	492	protein_coding	hypothetical protein&&-- && PF12005:Protein of unknown function (DUF3499)	-	1740	1594	1702	568	781	543	522.173	545.209	573.211	202.317	284.698	230.521
Rv3260c	7090.02	6792.78	6879.37	1398.27	1661.74	1668.72	-2.13488	1.71e-88	4.16e-86	whiB2	NC_000962.3	3639872	3640141	-	270	protein_coding	transcriptional regulator WhiB2&&sp|O53353|WHB2A_MYCTU Transcriptional regulator WhiB2 OS=Mycobacterium tuberculosis (strain ATCC 25618 / H37Rv) OX=83332 GN=whiB2 PE=1 SV=3 && PF02467:Transcription factor WhiB	Whib	8340	7015	7179	1383	1618	1389	4560.71	4372.24	4405.76	897.65	1074.77	1074.52
Rv3269	1440.96	1622.91	1896.4	3814.67	5044.79	7675.65	1.73701	5.28e-08	2.95e-07	Rv3269	NC_000962.3	3650234	3650515	+	282	protein_coding	hypothetical protein&&sp|P9WLP4|Y1993_MYCTO Uncharacterized protein MT2049 OS=Mycobacterium tuberculosis (strain CDC 1551 / Oshkosh) OX=83331 GN=MT2049 PE=4 SV=1 && PF07371:Protein of unknown function (DUF1490)	-	1695	1676	1979	3773	4912	6389	887.464	1000.15	1162.83	2344.69	3123.98	4732.16
Rv3270	2558.02	2837.19	3273.42	8403.8	8894.11	16318.4	1.95527	1.51e-08	9.04e-08	ctpC	NC_000962.3	3650526	3652682	+	2157	protein_coding	manganese/zinc-exporting P-type ATPase&&sp|P0A503|CTPC_MYCBO Manganese-exporting P-type ATPase OS=Mycobacterium bovis (strain ATCC BAA-935 / AF2122/97) OX=233413 GN=ctpC PE=3 SV=1 && PF00702:haloacid dehalogenase-like hydrolase|PF00122:E1-E2 ATPase	Hydrolase	3009	2930	3416	8312	8660	13583	205.969	228.59	262.415	675.311	720.056	1315.29
Rv3287c	297.543	269.194	283.646	526.754	773.356	1047.61	1.46322	5.41e-14	5.62e-13	rsbW	NC_000962.3	3668951	3669388	-	438	protein_coding	anti-sigma factor RsbW&&sp|P9WGX6|RSBW_MYCTO Anti-sigma-F factor RsbW OS=Mycobacterium tuberculosis (strain CDC 1551 / Oshkosh) OX=83331 GN=rsbW PE=3 SV=2 && -	-	350	278	296	521	753	872	117.984	106.81	111.979	208.455	308.333	415.832
Rv3288c	216.781	258.542	227.108	1063.62	1615.52	2068.79	2.75681	1.02e-47	7.12e-46	usfY	NC_000962.3	3669586	3669999	-	414	protein_coding	hypothetical protein&&-- && -	-	255	267	237	1052	1573	1722	90.9432	108.53	94.8568	445.311	681.439	868.777
Rv3289c	170.875	211.094	246.273	1146.52	1628.88	1882.57	2.89157	7.45e-59	7.7e-57	Rv3289c	NC_000962.3	3670034	3670411	-	378	protein_coding	transmembrane protein&&-- && -	-	201	218	257	1134	1586	1567	78.5117	97.052	112.658	525.738	752.506	865.87
Rv3290c	1513.22	1626.78	1920.36	10682.7	13704.7	13408.7	2.90114	4.29e-113	1.48e-110	lat	NC_000962.3	3670445	3671794	-	1350	protein_coding	L-lysine-epsilon aminotransferase&&sp|P63510|LAT_MYCBO Probable L-lysine-epsilon aminotransferase OS=Mycobacterium bovis (strain ATCC BAA-935 / AF2122/97) OX=233413 GN=lat PE=3 SV=1 && PF00202:Aminotransferase class-III	Aminotran_3	1780	1680	2004	10566	13344	11161	194.678	209.419	245.971	1371.59	1772.76	1726.81
Rv3299c	7270.25	7639.1	7505.11	3509.33	3366.62	3447.98	-1.11841	1.94e-33	7.62e-32	atsB	NC_000962.3	3683051	3685963	-	2913	protein_coding	arylsulfatase AtsB&&sp|Q32KH5|GALNS_CANLF N-acetylgalactosamine-6-sulfatase OS=Canis lupus familiaris OX=9615 GN=GALNS PE=2 SV=1 && PF00884:Sulfatase|PF06897:Protein of unknown function (DUF1269)	Sulfatase	8552	7889	7832	3471	3278	2870	433.468	455.744	445.505	208.815	201.821	205.786
Rv3310	1446.06	1586.11	1508.3	379.141	448.814	414.478	-1.86965	2.26e-54	2.08e-52	sapM	NC_000962.3	3697198	3698097	+	900	protein_coding	acid phosphatase&&sp|O53361|SAPM_MYCTU Phosphatidylinositol-3-phosphatase OS=Mycobacterium tuberculosis (strain ATCC 25618 / H37Rv) OX=83332 GN=sapM PE=1 SV=1 && PF04185:Phosphoesterase family	Phosphoesterase	1701	1638	1574	375	437	345	279.056	306.275	289.789	73.0192	87.0839	80.0667
Rv3311	1610.13	1620	1675.04	794.681	854.492	796.519	-1.00376	7.12e-21	1.27e-19	Rv3311	NC_000962.3	3698121	3699383	+	1263	protein_coding	hypothetical protein&&-- && -	-	1894	1673	1748	786	832	663	221.415	222.911	229.329	109.061	118.146	109.644
Rv3312A	216.781	182.045	195.486	29.3203	68.8112	8.4097	-2.47566	0.000914516	0.00251203	Rv3312A	NC_000962.3	3700705	3701016	-	312	protein_coding	pilin&&sp|Q7TWR6|PILIN_MYCBO Pilin OS=Mycobacterium bovis (strain ATCC BAA-935 / AF2122/97) OX=233413 GN=mtp PE=3 SV=1 && -	-	255	188	204	29	67	7	120.675	101.401	108.342	16.2889	38.514	4.68618
Rv3312b	40.8059	54.2261	58.454	12.1325	25.6758	6.00693	-1.78744	3.76e-05	0.00013658	Rv3312b	NC_000962.3	3700356	3700526	-	171	protein_coding	hypothetical protein&&-- && -	-	48	56	61	12	25	5	41.4453	55.1101	59.1091	12.298	26.2206	6.1073
Rv3313c	897.729	929.59	893.101	380.153	419.03	382.041	-1.20299	4.43e-23	9.12e-22	add	NC_000962.3	3701087	3702184	-	1098	protein_coding	adenosine deaminase&&sp|P63908|ADD_MYCBO Adenosine deaminase OS=Mycobacterium bovis (strain ATCC BAA-935 / AF2122/97) OX=233413 GN=add PE=3 SV=1 && PF00962:Adenosine/AMP deaminase	-	1056	960	932	376	408	318	142.001	147.132	140.648	60.0114	66.6433	60.4923
Rv3319	1079.66	1039.01	945.805	484.29	480.652	531.012	-1.03585	1.8e-17	2.43e-16	sdhB	NC_000962.3	3706772	3707563	+	792	protein_coding	succinate dehydrogenase iron-sulphur protein subunit&&sp|Q70KF8|SDHB_UROFA Succinate dehydrogenase [ubiquinone] iron-sulfur subunit, mitochondrial OS=Uromyces fabae OX=55588 GN=SDH2 PE=3 SV=1 && PF13085:2Fe-2S iron-sulfur cluster binding domain|PF13183:4Fe-4S dicluster domain	-	1270	1073	987	479	468	442	236.76	227.989	206.496	105.989	105.979	116.566
Rv3330	874.776	909.255	1038.76	349.821	476.544	341.194	-1.27196	2.11e-17	2.83e-16	dacB1	NC_000962.3	3715777	3716994	+	1218	protein_coding	penicillin-binding protein DacB&&sp|O53380|DACB1_MYCTU D-alanyl-D-alanine carboxypeptidase DacB1 OS=Mycobacterium tuberculosis (strain ATCC 25618 / H37Rv) OX=83332 GN=dacB1 PE=1 SV=1 && PF00768:D-alanyl-D-alanine carboxypeptidase	-	1029	939	1084	346	464	284	124.738	129.735	147.47	49.7826	68.3234	48.702
Rv3334	187.877	177.203	163.863	858.376	903.79	1229.02	2.49735	2.48e-54	2.23e-52	Rv3334	NC_000962.3	3721257	3721697	+	441	protein_coding	MerR family transcriptional regulator&&sp|A5F2W6|CUER_VIBC3 HTH-type transcriptional regulator CueR OS=Vibrio cholerae serotype O1 (strain ATCC 39541 / Classical Ogawa 395 / O395) OX=345073 GN=cueR PE=3 SV=1 && PF09278:MerR, DNA binding|PF00376:MerR family regulatory protein	MerR	221	183	171	849	880	1023	73.9919	69.8316	64.2507	337.379	357.884	484.521
Rv3337	356.201	297.275	338.267	947.348	830.87	1003.16	1.48619	2.77e-28	8.23e-27	Rv3337	NC_000962.3	3723728	3724548	+	821	protein_coding	--&&-- && PF12697:Alpha/beta hydrolase family	-	419	307	353	937	809	835	75.3531	62.9267	71.2446	200.007	176.728	212.431
Rv3340	902.83	941.21	885.434	2682.3	2128.01	3809.59	1.65859	2.29e-23	4.81e-22	metC	NC_000962.3	3726127	3727476	+	1350	protein_coding	O-acetylhomoserine sulfhydrylase&&sp|Q79VI4|METY_CORGL O-acetyl-L-homoserine sulfhydrylase OS=Corynebacterium glutamicum (strain ATCC 13032 / DSM 20300 / BCRC 11384 / JCM 1318 / LMG 3730 / NCIMB 10025) OX=196627 GN=metY PE=1 SV=1 && PF01053:Cys/Met metabolism PLP-dependent enzyme	Cys_Met_Meta_PP	1062	972	924	2653	2072	3171	116.15	121.164	113.412	344.391	275.267	490.612
Rv3341	911.331	849.219	854.77	3024.03	2524.45	4340.61	1.91826	2.31e-32	8.54e-31	metA	NC_000962.3	3727488	3728627	+	1140	protein_coding	homoserine O-acetyltransferase&&sp|P0A5J9|METXA_MYCBO Homoserine O-acetyltransferase OS=Mycobacterium bovis (strain ATCC BAA-935 / AF2122/97) OX=233413 GN=metXA PE=3 SV=1 && PF00561:alpha/beta hydrolase fold	Abhydrolase_1	1072	877	892	2991	2458	3613	138.842	129.46	129.652	459.791	386.701	661.97
Rv3342	398.707	424.125	390.013	1496.35	1334.12	2144.47	2.03555	1.36e-36	6.32e-35	Rv3342	NC_000962.3	3728624	3729355	+	732	protein_coding	methyltransferase&&sp|P9WK00|Y3342_MYCTO Uncharacterized methyltransferase MT3445 OS=Mycobacterium tuberculosis (strain CDC 1551 / Oshkosh) OX=83331 GN=MT3445 PE=3 SV=1 && PF08241:Methyltransferase domain	Methyltransf_11	469	438	407	1480	1299	1785	94.6002	100.694	92.1306	354.323	318.271	509.334
Rv3352c	94.3636	78.4341	107.325	32.3534	60.595	38.4443	-1.08978	0.000167356	0.000541353	Rv3352c	NC_000962.3	3768222	3768593	-	372	protein_coding	oxidoreductase&&sp|Q796Y5|YGAK_BACSU Uncharacterized FAD-linked oxidoreductase YgaK OS=Bacillus subtilis (strain 168) OX=224308 GN=ygaK PE=3 SV=4 && PF01565:FAD binding domain	FAD_binding_4	111	81	112	32	59	32	44.0565	36.6422	49.8879	15.0749	28.4451	17.9673
Rv3353c	58.6584	64.8776	64.2036	23.254	35.9462	27.6319	-1.11068	0.000494169	0.00144287	Rv3353c	NC_000962.3	3768736	3768996	-	261	protein_coding	hypothetical protein&&-- && -	-	69	67	67	23	35	23	39.0336	43.199	42.5358	15.4431	24.0506	18.4061
Rv3358	75.6609	73.5925	50.7879	24.2651	30.811	37.243	-1.12436	0.000482596	0.00141393	relK	NC_000962.3	3771045	3771302	+	258	protein_coding	toxin RelK&&sp|P9WF08|RELK_MYCTO Toxin RelK OS=Mycobacterium tuberculosis (strain CDC 1551 / Oshkosh) OX=83331 GN=relK PE=3 SV=1 && PF06769:YoeB-like toxin of bacterial type II toxin-antitoxin system	-	89	76	53	24	30	31	50.9332	49.5717	34.039	16.302	20.8545	25.0967
Rv3370c	614.639	540.324	597.956	2932.03	4536.41	6477.87	2.99188	1.44e-20	2.51e-19	dnaE2	NC_000962.3	3781501	3784740	-	3240	protein_coding	error-prone DNA polymerase&&sp|Q7TWL9|DNAE2_MYCBO Error-prone DNA polymerase OS=Mycobacterium bovis (strain ATCC BAA-935 / AF2122/97) OX=233413 GN=dnaE2 PE=3 SV=2 && PF14579:Helix-hairpin-helix motif|PF02811:PHP domain|PF07733:Bacterial DNA polymerase III alpha NTPase domain|PF17657:Bacterial DNA polymerase III alpha subunit finger domain	-	723	558	624	2900	4417	5392	32.9476	28.982	31.9124	156.856	244.501	347.6
Rv3371	1035.45	1052.57	1269.7	2127.24	2191.69	2916.96	1.10737	3.94e-15	4.45e-14	Rv3371	NC_000962.3	3784932	3786272	+	1341	protein_coding	diacyglycerol O-acyltransferase&&sp|P9WKA9|Y3371_MYCTU Putative diacyglycerol O-acyltransferase Rv3371 OS=Mycobacterium tuberculosis (strain ATCC 25618 / H37Rv) OX=83332 GN=Rv3371 PE=1 SV=1 && PF03007:Wax ester synthase-like Acyl-CoA acyltransferase domain|PF06974:Protein of unknown function (DUF1298)	-	1218	1087	1325	2104	2134	2428	134.106	136.408	163.722	274.957	285.407	378.177
Rv3377c	2321.68	2501.18	2622.76	1009.02	1132.82	1319.12	-1.1061	1.87e-19	2.94e-18	Rv3377c	NC_000962.3	3790848	3792353	-	1506	protein_coding	type B diterpene cyclase&&sp|O50406|DITCY_MYCTU Type B diterpene cyclase OS=Mycobacterium tuberculosis (strain ATCC 25618 / H37Rv) OX=83332 GN=Rv3377c PE=1 SV=1 && PF13243:Squalene-hopene cyclase C-terminal domain	-	2731	2583	2737	998	1103	1098	267.748	288.628	301.141	116.133	131.356	152.283
Rv3378c	1584.63	1567.71	1514.05	622.803	617.247	673.977	-1.28659	1.82e-31	6.54e-30	Rv3378c	NC_000962.3	3792358	3793248	-	891	protein_coding	diterpene synthase&&sp|P9WJ60|TUBAT_MYCTO Tuberculosinyl adenosine transferase OS=Mycobacterium tuberculosis (strain CDC 1551 / Oshkosh) OX=83331 GN=MT3488 PE=3 SV=1 && -	-	1864	1619	1580	616	601	561	308.886	305.78	293.832	121.158	120.975	131.511
Rv3386	225.282	244.017	237.649	87.9608	132.487	90.1039	-1.1835	2.81e-09	1.87e-08	Rv3386	NC_000962.3	3800092	3800796	+	705	protein_coding	transposase&&-- && PF05598:Transposase domain (DUF772)	-	265	252	248	87	129	75	55.4992	60.1521	58.2885	21.6261	32.817	22.2202
Rv3387	178.526	175.266	137.99	85.9387	72.9194	63.6734	-1.14049	2.24e-07	1.15e-06	Rv3387	NC_000962.3	3800786	3801463	+	678	protein_coding	transposase&&-- && PF01609:Transposase DDE domain	Transposase_11	210	181	144	85	71	53	45.732	44.925	35.1928	21.9704	18.7814	16.3276
Rv3395c	102.865	185.918	126.491	283.092	306.056	251.09	1.02118	8.08e-07	3.8e-06	Rv3395c	NC_000962.3	3811022	3811636	-	615	protein_coding	hypothetical protein&&sp|P9WKZ8|Y3395_MYCTO Uncharacterized protein MT3502 OS=Mycobacterium tuberculosis (strain CDC 1551 / Oshkosh) OX=83331 GN=MT3502 PE=4 SV=1 && -	-	121	192	132	280	298	209	29.0496	52.5371	35.5647	79.7869	86.904	70.9817
Rv3406	74.8108	62.941	73.7862	187.043	220.812	187.416	1.49187	2.53e-13	2.53e-12	Rv3406	NC_000962.3	3825330	3826217	+	888	protein_coding	dioxygenase&&sp|P65076|ATSK_MYCBO Alpha-ketoglutarate-dependent sulfate ester dioxygenase OS=Mycobacterium bovis (strain ATCC BAA-935 / AF2122/97) OX=233413 GN=BQ2027_MB3440 PE=3 SV=1 && PF02668:Taurine catabolism dioxygenase TauD, TfdA family	-	88	65	77	185	215	156	14.6319	12.318	14.3681	36.5096	43.4234	36.6933
Rv3413c	1592.28	1772.03	1758.41	704.698	937.682	843.373	-1.0433	2.93e-16	3.67e-15	Rv3413c	NC_000962.3	3832146	3833045	-	900	protein_coding	anti-sigma-D factor RsdA&&sp|P65082|RSDA_MYCBO Anti-sigma-D factor RsdA OS=Mycobacterium bovis (strain ATCC BAA-935 / AF2122/97) OX=233413 GN=rsda PE=3 SV=1 && PF16751:Anti-sigma-D factor RsdA to sigma factor binding region	-	1873	1830	1835	697	913	702	307.274	342.175	337.842	135.718	181.94	162.918
Rv3414c	1871.97	1922.12	1951.98	591.461	820.6	970.72	-1.27141	4.92e-17	6.41e-16	sigD	NC_000962.3	3833038	3833676	-	639	protein_coding	ECF RNA polymerase sigma factor SigD&&sp|P66812|RPSD_MYCBO ECF RNA polymerase sigma factor SigD OS=Mycobacterium bovis (strain ATCC BAA-935 / AF2122/97) OX=233413 GN=sigD PE=3 SV=1 && PF08281:Sigma-70, region 4|PF04542:Sigma-70 region 2	Sigma70_r2	2202	1985	2037	585	799	808	508.8	522.756	528.215	160.437	224.256	264.111
Rv3417c	2021.59	2252.32	2165.67	11725.1	10023.8	18646.7	2.64911	4.52e-53	3.81e-51	groEL1	NC_000962.3	3835272	3836891	-	1620	protein_coding	chaperonin GroEL&&sp|P0A519|CH601_MYCBO 60 kDa chaperonin 1 OS=Mycobacterium bovis (strain ATCC BAA-935 / AF2122/97) OX=233413 GN=groL1 PE=1 SV=1 && PF00118:TCP-1/cpn60 chaperonin family	-	2378	2326	2260	11597	9760	15521	216.734	241.621	231.161	1254.52	1080.52	2001.15
Rv3418c	4498.85	4246.1	3802.39	10424.9	10531.2	16746.1	1.58709	2.2e-23	4.64e-22	groES	NC_000962.3	3836986	3837288	-	303	protein_coding	chaperonin GroES&&sp|P15020|CH10_MYCBO 10 kDa chaperonin OS=Mycobacterium bovis (strain ATCC BAA-935 / AF2122/97) OX=233413 GN=groS PE=1 SV=4 && PF00166:Chaperonin 10 Kd subunit	-	5292	4385	3968	10311	10254	13939	2578.74	2435.38	2169.95	5963.57	6069.45	9608.69
Rv3425	73.9607	67.7826	52.7044	228.496	281.407	327.978	2.10224	2e-23	4.25e-22	PPE57	NC_000962.3	3842239	3842769	+	531	protein_coding	PPE family protein PPE57&&sp|Q50703|PPE57_MYCTU PPE family protein PPE57 OS=Mycobacterium tuberculosis (strain ATCC 25618 / H37Rv) OX=83332 GN=PPE57 PE=1 SV=1 && PF00823:PPE family	-	87	70	55	226	274	273	24.1911	22.1842	17.1628	74.5869	92.5454	107.385
Rv3429	34.0049	44.5428	52.7044	77.8504	101.676	111.729	1.15159	2.92e-05	0.000108552	PPE59	NC_000962.3	3847165	3847701	+	537	protein_coding	PPE family protein PPE59&&sp|P9WHY0|PPE59_MYCTO Uncharacterized PPE family protein PPE59 OS=Mycobacterium tuberculosis (strain CDC 1551 / Oshkosh) OX=83331 GN=PPE59 PE=3 SV=1 && PF00823:PPE family	-	40	46	55	77	99	93	10.9981	14.4153	16.9711	25.1284	33.0643	36.173
Rv3444c	199.779	183.013	192.611	76.8393	74.9734	91.3053	-1.24747	4.06e-10	2.97e-09	esxT	NC_000962.3	3862624	3862926	-	303	protein_coding	ESAT-6 like protein EsxT&&sp|O06261|ESXT_MYCTO ESAT-6-like protein EsxT OS=Mycobacterium tuberculosis (strain CDC 1551 / Oshkosh) OX=83331 GN=esxT PE=2 SV=1 && PF06013:Proteins of 100 residues with WXG	-	235	189	201	76	73	76	114.513	104.968	109.919	43.9561	43.2095	52.3898
Rv3445c	175.125	168.488	162.905	55.6074	87.2979	66.0762	-1.2767	8.16e-09	5.12e-08	esxU	NC_000962.3	3862947	3863264	-	318	protein_coding	ESAT-6 like protein EsxU&&sp|Q7D5J1|ESXU_MYCTO ESAT-6-like protein EsxU OS=Mycobacterium tuberculosis (strain CDC 1551 / Oshkosh) OX=83331 GN=esxU PE=2 SV=2 && PF06013:Proteins of 100 residues with WXG	-	206	174	170	55	85	55	95.6468	92.0792	88.5813	30.3099	47.9392	36.1253
Rv3463	303.494	344.723	263.522	580.339	649.085	665.568	1.05508	2.15e-13	2.18e-12	Rv3463	NC_000962.3	3880907	3881764	+	858	protein_coding	hypothetical protein&&-- && PF00296:Luciferase-like monooxygenase	-	357	356	275	574	632	554	61.4343	69.8236	53.1087	117.239	132.108	134.865
Rv3477	28.054	22.2714	12.4574	171.877	135.568	241.479	3.11525	1.49e-24	3.34e-23	PE31	NC_000962.3	3894093	3894389	+	297	protein_coding	PE family protein PE31&&sp|P9WIF2|PG34_MYCTO Uncharacterized PE-PGRS family protein PE_PGRS34 OS=Mycobacterium tuberculosis (strain CDC 1551 / Oshkosh) OX=83331 GN=PE_PGRS34 PE=3 SV=1 && PF00934:PE family	-	33	23	13	170	132	201	16.4054	13.032	7.25283	100.309	79.7106	141.356
Rv3486	310.295	315.673	305.686	671.333	659.356	746.06	1.15564	5.04e-19	7.61e-18	Rv3486	NC_000962.3	3905772	3906221	+	450	protein_coding	hypothetical protein&&sp|O06349|Y3486_MYCTU Uncharacterized membrane protein Rv3486 OS=Mycobacterium tuberculosis (strain ATCC 25618 / H37Rv) OX=83332 GN=Rv3486 PE=1 SV=4 && PF07681:DoxX	-	365	326	319	664	642	621	119.76	121.912	117.462	258.585	255.871	288.24
Rv3487c	1343.19	1423.43	1486.26	256.805	349.191	342.395	-2.16649	5.95e-56	5.72e-54	lipF	NC_000962.3	3906174	3907007	-	834	protein_coding	carboxylesterase LipF&&sp|O06350|LIPF_MYCTU Carboxylesterase LipF OS=Mycobacterium tuberculosis (strain ATCC 25618 / H37Rv) OX=83332 GN=lipF PE=1 SV=3 && PF07859:alpha/beta hydrolase fold	Abhydrolase_3	1580	1470	1551	254	340	285	279.719	296.614	308.153	53.3723	73.1159	71.3763
Rv3492c	466.717	631.346	558.667	248.717	225.947	231.867	-1.22811	1.87e-15	2.18e-14	Rv3492c	NC_000962.3	3910465	3910947	-	483	protein_coding	Mce associated protein&&-- && -	-	549	652	583	246	220	193	167.825	227.164	200.005	89.2558	81.691	83.4614
Rv3494c	1027.8	1235.58	1360.73	625.836	570.004	587.478	-1.02235	1.15e-14	1.24e-13	mce4F	NC_000962.3	3911675	3913369	-	1695	protein_coding	Mce family protein Mce4&&-- && PF02470:MlaD protein	-	1209	1276	1420	619	555	489	105.314	126.684	138.816	63.9984	58.7249	60.258
Rv3496c	1128.11	1216.21	1326.24	601.571	592.598	543.026	-1.07805	3.89e-19	5.97e-18	mce4D	NC_000962.3	3914531	3915886	-	1356	protein_coding	Mce family protein Mce4D&&-- && PF02470:MlaD protein|PF11887:Cholesterol uptake porter CUP1 of Mce4, putative	-	1327	1256	1384	595	577	452	144.491	155.873	169.121	76.8963	76.3159	69.6232
Rv3500c	730.255	966.386	1066.55	428.683	490.922	359.214	-1.10929	6.9e-12	6.12e-11	yrbE4B	NC_000962.3	3919220	3920062	-	843	protein_coding	integral membrane protein&&-- && PF02405:Permease MlaE	-	859	998	1113	424	478	299	150.451	199.224	218.77	88.1428	101.695	74.0831
Rv3503c	189.577	183.013	186.861	443.848	394.381	437.304	1.18838	8.85e-16	1.06e-14	fdxD	NC_000962.3	3922065	3922256	-	192	protein_coding	ferredoxin FdxD&&-- && PF13459:4Fe-4S single cluster domain	-	223	189	195	439	384	364	171.488	165.653	168.288	400.693	358.698	395.982
Rv3515c	300.943	274.035	233.816	585.394	656.274	629.526	1.20853	2.64e-17	3.49e-16	fadD19	NC_000962.3	3950824	3952470	-	1647	protein_coding	acyl-CoA synthetase&&sp|Q7TWB7|FAC19_MYCBO Medium/long-chain-fatty-acid--CoA/3-oxocholest-4-en-26-oate--CoA ligase OS=Mycobacterium bovis (strain ATCC BAA-935 / AF2122/97) OX=233413 GN=fadD19 PE=3 SV=1 && PF13193:AMP-binding enzyme C-terminal domain|PF00501:AMP-binding enzyme	AMP-binding	354	283	244	579	639	524	31.7351	28.9156	24.548	61.6075	69.5835	66.4528
Rv3516	200.629	184.95	237.649	424.638	485.787	561.047	1.23824	1.88e-14	2.01e-13	echA19	NC_000962.3	3952544	3953335	+	792	protein_coding	enoyl-CoA hydratase EchA19&&sp|Q54HG7|AUHM_DICDI Methylglutaconyl-CoA hydratase, mitochondrial OS=Dictyostelium discoideum OX=44689 GN=auh PE=3 SV=1 && PF00378:Enoyl-CoA hydratase/isomerase	ECH	236	191	248	420	473	467	43.9964	40.5833	51.8856	92.9336	107.111	123.159
Rv3526	622.29	721.4	608.497	1177.87	1302.28	1817.7	1.1378	3.64e-13	3.61e-12	kshA	NC_000962.3	3962439	3963599	+	1161	protein_coding	3-ketosteroid-9-alpha-monooxygenase oxygenase subunit&&sp|P71875|KSHA_MYCTU 3-ketosteroid-9-alpha-monooxygenase, oxygenase component OS=Mycobacterium tuberculosis (strain ATCC 25618 / H37Rv) OX=83332 GN=kshA PE=1 SV=2 && PF00355:Rieske [2Fe-2S] domain	-	732	745	635	1165	1268	1513	93.0913	107.985	90.6279	175.85	195.878	272.196
Rv3527	187.877	200.443	212.734	342.744	377.948	493.769	1.01307	2.41e-09	1.61e-08	Rv3527	NC_000962.3	3963605	3964054	+	450	protein_coding	hypothetical protein&&-- && -	-	221	207	222	339	368	411	72.512	77.4101	81.7449	132.019	146.668	190.768
Rv3534c	536.427	427.999	418.761	960.492	1002.38	1129.3	1.15861	2.35e-17	3.13e-16	hsaF	NC_000962.3	3972552	3973592	-	1041	protein_coding	4-hydroxy-2-oxovalerate aldolase&&sp|Q7TW97|HOA_MYCBO 4-hydroxy-2-oxohexanoate aldolase OS=Mycobacterium bovis (strain ATCC BAA-935 / AF2122/97) OX=233413 GN=hsaF PE=3 SV=1 && PF00682:HMGL-like|PF07836:DmpG-like communication domain	HMGL-like	631	442	437	950	976	940	89.4971	71.4515	69.5586	159.927	168.15	188.605
Rv3535c	354.501	328.261	330.601	792.658	843.195	897.435	1.32057	1.28e-25	3.02e-24	hsaG	NC_000962.3	3973589	3974500	-	912	protein_coding	acetaldehyde dehydrogenase&&sp|Q7TTR4|ACDH_MYCBO Propanal dehydrogenase (CoA-propanoylating) OS=Mycobacterium bovis (strain ATCC BAA-935 / AF2122/97) OX=233413 GN=hsaG PE=3 SV=1 && PF09290:Prokaryotic acetaldehyde dehydrogenase, dimerisation|PF01118:Semialdehyde dehydrogenase, NAD binding domain	-	417	339	345	784	821	747	67.5105	62.5525	62.6823	150.65	161.453	171.081
Rv3536c	527.926	487.066	485.839	1025.2	1111.25	1411.63	1.23979	6.5e-19	9.77e-18	hsaE	NC_000962.3	3974511	3975296	-	786	protein_coding	hydratase&&sp|Q706S1|MHPD3_PSEPU 2-keto-4-pentenoate hydratase 3 OS=Pseudomonas putida OX=303 GN=mhpD3 PE=3 SV=1 && PF01557:Fumarylacetoacetate (FAA) hydrolase family	FAA_hydrolase	621	503	507	1014	1082	1175	116.654	107.692	106.882	226.081	246.89	312.242
Rv3537	374.904	356.343	275.021	962.514	934.601	916.657	1.48247	1.53e-26	3.96e-25	kstD	NC_000962.3	3975369	3977060	+	1692	protein_coding	3-oxosteroid 1-dehydrogenase&&sp|Q7D5C1|3O1D_MYCTO 3-oxosteroid 1-dehydrogenase OS=Mycobacterium tuberculosis (strain CDC 1551 / Oshkosh) OX=83331 GN=kstD PE=3 SV=1 && PF00890:FAD binding domain	-	441	368	287	952	910	763	38.483	36.6005	28.1062	98.6018	96.4583	94.1889
Rv3538	146.221	113.294	120.741	250.739	270.11	287.131	1.0835	9.79e-10	6.82e-09	Rv3538	NC_000962.3	3977062	3977922	+	861	protein_coding	dehydrogenase&&sp|Q8VYI3|ECH2_ARATH Enoyl-CoA hydratase 2, peroxisomal OS=Arabidopsis thaliana OX=3702 GN=ECH2 PE=1 SV=1 && PF13452:N-terminal half of MaoC dehydratase|PF01575:MaoC like domain	-	172	117	126	248	263	239	29.4955	22.8677	24.2487	50.4774	54.7837	57.9789
Rv3545c	335.798	268.225	285.562	678.41	694.275	844.574	1.31488	2.73e-19	4.24e-18	cyp125	NC_000962.3	3984144	3985445	-	1302	protein_coding	steroid C26-monooxygenase&&sp|P63710|CP125_MYCBO Steroid C26-monooxygenase OS=Mycobacterium bovis (strain ATCC BAA-935 / AF2122/97) OX=233413 GN=cyp125 PE=1 SV=1 && PF00067:Cytochrome P450	p450	395	277	298	671	676	703	44.7936	35.8021	37.925	90.315	93.1182	112.777
Rv3546	267.789	238.207	242.44	468.113	530.976	549.033	1.04667	2.21e-13	2.23e-12	fadA5	NC_000962.3	3985557	3986732	+	1176	protein_coding	acetyl-CoA acetyltransferase FadA&&sp|I6XHI4|FADA5_MYCTU Steroid 3-ketoacyl-CoA thiolase OS=Mycobacterium tuberculosis (strain ATCC 25618 / H37Rv) OX=83332 GN=fadA5 PE=1 SV=1 && PF00108:Thiolase, N-terminal domain|PF02803:Thiolase, C-terminal domain	Thiolase_N	315	246	253	463	517	457	39.5488	35.202	35.6479	68.9957	78.8464	81.1679
Rv3548c	355.351	360.216	366.056	957.459	944.871	1254.25	1.54412	5.64e-28	1.62e-26	Rv3548c	NC_000962.3	3987382	3988296	-	915	protein_coding	short-chain type dehydrogenase/reductase&&sp|P51660|DHB4_MOUSE Peroxisomal multifunctional enzyme type 2 OS=Mus musculus OX=10090 GN=Hsd17b4 PE=1 SV=3 && PF00106:short chain dehydrogenase	adh_short	418	372	382	947	920	1044	67.4505	68.4166	69.1772	181.375	180.329	238.317
Rv3549c	100.314	108.452	101.576	685.488	762.059	1050.01	3.00779	7.11e-64	9.48e-62	Rv3549c	NC_000962.3	3988319	3989098	-	780	protein_coding	short-chain type dehydrogenase/reductase&&sp|Q9S9W2|SDRA_ARATH Short-chain dehydrogenase/reductase SDRA OS=Arabidopsis thaliana OX=3702 GN=SDRA PE=1 SV=1 && PF13561:Enoyl-(Acyl carrier protein) reductase	-	118	112	106	678	742	874	22.3366	24.1637	22.5181	152.329	170.611	234.041
Rv3550	86.7125	88.1174	50.7879	445.87	506.328	570.658	2.75089	8.49e-45	5.16e-43	echA20	NC_000962.3	3989153	3989896	+	744	protein_coding	enoyl-CoA hydratase EchA20&&sp|I6Y3U6|ECH20_MYCTU (7aS)-7a-methyl-1,5-dioxo-2,3,5,6,7,7a-hexahydro-1H-indene-carboxyl-CoA hydrolase OS=Mycobacterium tuberculosis (strain ATCC 25618 / H37Rv) OX=83332 GN=echA20 PE=1 SV=1 && PF00378:Enoyl-CoA hydratase/isomerase	ECH	102	91	53	441	493	475	20.2422	20.583	11.8038	103.876	118.843	133.351
Rv3551	122.418	180.108	118.825	894.774	733.302	947.893	2.61391	4.35e-52	3.53e-50	Rv3551	NC_000962.3	3989896	3990774	+	879	protein_coding	CoA-transferase subunit alpha&&sp|P9WPW0|IPDA_MYCTO Cholesterol ring-cleaving hydrolase IpdA subunit OS=Mycobacterium tuberculosis (strain CDC 1551 / Oshkosh) OX=83331 GN=ipdA PE=3 SV=1 && PF01144:Coenzyme A transferase	-	144	186	124	885	714	789	24.1882	35.6093	23.3751	176.442	145.683	187.484
Rv3552	90.9631	102.642	83.3688	529.787	433.408	634.332	2.52702	1.2e-43	6.98e-42	Rv3552	NC_000962.3	3990771	3991523	+	753	protein_coding	CoA-transferase subunit beta&&sp|P63653|IPDB_MYCBO Cholesterol ring-cleaving hydrolase IpdB subunit OS=Mycobacterium bovis (strain ATCC BAA-935 / AF2122/97) OX=233413 GN=ipdB PE=3 SV=1 && -	-	107	106	87	524	422	528	20.9807	23.6892	19.1445	121.951	100.512	146.458
Rv3553	147.071	127.819	137.99	442.837	447.787	587.478	1.83679	7.26e-28	2.06e-26	Rv3553	NC_000962.3	3991621	3992688	+	1068	protein_coding	oxidoreductase&&sp|P71847|IPDC_MYCTU (3aS,4S,5R,7aS)-5-hydroxy-7a-methyl-1-oxo-octahydro-1H-indene-4-carboxyl-CoA dehydrogenase OS=Mycobacterium tuberculosis (strain ATCC 25618 / H37Rv) OX=83332 GN=ipdC PE=1 SV=3 && PF03060:Nitronate monooxygenase	NPD	173	132	144	438	436	489	23.9169	20.799	22.3415	71.8706	73.2174	95.6341
Rv3556c	521.125	513.211	503.088	1788.54	1482.01	2066.38	1.79477	2.2e-40	1.17e-38	fadA6	NC_000962.3	3995804	3996964	-	1161	protein_coding	acetyl-CoA acetyltransferase FadA&&sp|I6XHJ3|FADA6_MYCTU Steroid 3-ketoacyl-CoA thiolase FadA6 OS=Mycobacterium tuberculosis (strain ATCC 25618 / H37Rv) OX=83332 GN=fadA6 PE=1 SV=1 && PF02803:Thiolase, C-terminal domain|PF00108:Thiolase, N-terminal domain	Thiolase_N	613	530	525	1769	1443	1720	77.9576	76.8216	74.9286	267.02	222.912	309.437
Rv3557c	147.071	136.534	125.532	425.649	430.327	545.429	1.77306	1.08e-26	2.85e-25	Rv3557c	NC_000962.3	3997029	3997631	-	603	protein_coding	HTH-type transcriptional regulator KstR2&&sp|P9WMB8|KSTR2_MYCTO HTH-type transcriptional repressor KstR2 OS=Mycobacterium tuberculosis (strain CDC 1551 / Oshkosh) OX=83331 GN=kstR2 PE=3 SV=1 && PF17932:Tetracyclin repressor-like, C-terminal domain|PF00440:Bacterial regulatory proteins, tetR family	TetR_N	173	141	131	421	419	454	42.3603	39.3497	35.9977	122.353	124.622	157.258
Rv3560c	85.0122	94.8956	78.5775	307.357	339.948	442.11	2.0735	3.2e-27	8.76e-26	fadE30	NC_000962.3	4000432	4001589	-	1158	protein_coding	acyl-CoA dehydrogenase FadE30&&sp|I6Y3V5|IPDE1_MYCTU Acyl-CoA dehydrogenase IpdE1 OS=Mycobacterium tuberculosis (strain ATCC 25618 / H37Rv) OX=83332 GN=ipdE1 PE=1 SV=1 && PF00441:Acyl-CoA dehydrogenase, C-terminal domain|PF02771:Acyl-CoA dehydrogenase, N-terminal domain|PF02770:Acyl-CoA dehydrogenase, middle domain	-	100	98	82	304	331	368	12.7503	14.2415	11.7334	46.0059	51.2647	66.3765
Rv3561	160.673	90.054	67.0784	416.55	420.057	537.019	2.10477	2.82e-19	4.37e-18	fadD3	NC_000962.3	4001637	4003160	+	1524	protein_coding	fatty-acid--CoA ligase FadD3&&sp|P96843|FAD3_MYCTU 3-[(3aS,4S,7aS)-7a-methyl-1,5-dioxo-octahydro-1H-inden-4-yl]propanoyl:CoA ligase OS=Mycobacterium tuberculosis (strain ATCC 25618 / H37Rv) OX=83332 GN=fadD3 PE=1 SV=1 && PF13193:AMP-binding enzyme C-terminal domain|PF00501:AMP-binding enzyme	AMP-binding	189	93	70	412	409	447	18.3108	10.2692	7.61086	47.3763	48.1324	61.263
Rv3570c	790.614	725.274	683.241	1548.92	1724.39	2301.85	1.34097	6.19e-20	1.02e-18	hsaA	NC_000962.3	4011086	4012270	-	1185	protein_coding	flavin-dependent monooxygenase oxygenase subunit HsaA&&sp|P9WJA0|HSAA_MYCTO Flavin-dependent monooxygenase, oxygenase subunit HsaA OS=Mycobacterium tuberculosis (strain CDC 1551 / Oshkosh) OX=83331 GN=hsaA PE=3 SV=1 && PF08028:Acyl-CoA dehydrogenase, C-terminal domain	Acyl-CoA_dh_2	930	749	713	1532	1679	1916	115.876	106.366	99.6992	226.563	254.115	337.717
Rv3574	312.845	310.832	298.02	688.521	828.816	1382.79	1.65222	1.09e-16	1.39e-15	kstR	NC_000962.3	4016484	4017083	+	600	protein_coding	HTH-type transcriptional regulator KstR&&sp|P96856|KSTR_MYCTU HTH-type transcriptional repressor KstR OS=Mycobacterium tuberculosis (strain ATCC 25618 / H37Rv) OX=83332 GN=kstR PE=1 SV=5 && PF00440:Bacterial regulatory proteins, tetR family|PF17925:Tetracyclin repressor-like, C-terminal domain	TetR_N	368	321	311	681	807	1151	90.558	90.0313	85.8874	198.904	241.224	400.682
Rv3581c	610.388	627.473	615.204	1392.21	1366.98	2038.75	1.37164	1.46e-19	2.31e-18	ispF	NC_000962.3	4023868	4024347	-	480	protein_coding	2C-methyl-D-erythritol 2%2C4-cyclodiphosphate synthase&&sp|P65184|ISPF_MYCBO 2-C-methyl-D-erythritol 2,4-cyclodiphosphate synthase OS=Mycobacterium bovis (strain ATCC BAA-935 / AF2122/97) OX=233413 GN=ispF PE=3 SV=1 && PF02542:YgbB family	-	718	648	642	1377	1331	1697	220.858	227.182	221.623	502.737	497.32	738.441
Rv3582c	1407.8	1125.19	1105.83	3158.5	3309.1	4669.79	1.61307	4.54e-26	1.12e-24	ispD	NC_000962.3	4024344	4025039	-	696	protein_coding	2-C-methyl-D-erythritol 4-phosphate cytidylyltransferase&&sp|A1KPR8|ISPD_MYCBP 2-C-methyl-D-erythritol 4-phosphate cytidylyltransferase OS=Mycobacterium bovis (strain BCG / Pasteur 1173P2) OX=410289 GN=ispD PE=3 SV=1 && PF01128:2-C-methyl-D-erythritol 4-phosphate cytidylyltransferase	-	1656	1162	1154	3124	3222	3887	351.303	280.955	274.737	786.593	830.262	1166.49
Rv3583c	3513.56	3052.15	2628.51	4515.32	5841.77	9090.89	1.08072	0.000891635	0.00245407	Rv3583c	NC_000962.3	4025056	4025544	-	489	protein_coding	RNA polymerase-binding transcription factor CarD&&sp|P9WJG2|CARD_MYCTO RNA polymerase-binding transcription factor CarD OS=Mycobacterium tuberculosis (strain CDC 1551 / Oshkosh) OX=83331 GN=carD PE=3 SV=1 && PF02559:CarD-like/TRCF domain	-	4133	3152	2743	4466	5688	7567	1247.92	1084.72	929.474	1600.51	2086.17	3232.14
Rv3612c	1185.92	1437.96	1701.87	449.915	518.652	585.075	-1.47823	8.66e-23	1.76e-21	Rv3612c	NC_000962.3	4053518	4053847	-	330	protein_coding	hypothetical protein&&-- && -	-	1395	1485	1776	445	505	487	624.152	757.272	891.763	236.317	274.458	308.241
Rv3613c	3041.74	3646.7	3742.01	1159.67	1296.12	1391.2	-1.43937	1.26e-32	4.74e-31	Rv3613c	NC_000962.3	4053881	4054042	-	162	protein_coding	hypothetical protein&&-- && -	-	3578	3766	3905	1147	1262	1158	3261.04	3912.05	3994.17	1240.79	1397.15	1493.03
Rv3656c	65.4594	31.9547	46.9549	76.8393	124.271	138.159	1.22339	4.12e-05	0.000148377	Rv3656c	NC_000962.3	4095324	4095530	-	207	protein_coding	hypothetical protein&&-- && PF14029:Protein of unknown function (DUF4244)	-	77	33	49	76	121	115	54.9225	26.8277	39.2235	64.3416	104.837	116.039
Rv3657c	62.9091	36.7963	54.621	130.425	167.406	174.201	1.60605	7e-11	5.56e-10	Rv3657c	NC_000962.3	4095540	4096115	-	576	protein_coding	membrane protein&&-- && PF00482:Type II secretion system (T2SS), protein F	-	74	38	57	129	163	145	18.9688	11.102	16.3973	39.2478	50.7533	52.58
Rv3658c	153.872	129.755	139.906	314.435	400.543	303.951	1.26615	4.15e-13	4.05e-12	Rv3658c	NC_000962.3	4096139	4096939	-	801	protein_coding	transmembrane protein&&-- && PF00482:Type II secretion system (T2SS), protein F	-	181	134	146	311	390	253	33.3639	28.1522	30.2024	68.0419	87.3234	65.9726
Rv3659c	89.2629	87.149	69.9532	516.643	509.409	649.95	2.76277	1.74e-55	1.63e-53	Rv3659c	NC_000962.3	4096936	4097994	-	1059	protein_coding	conjugal transfer protein&&sp|P9WMT2|Y3659_MYCTO Putative conjugal transfer protein MT3759 OS=Mycobacterium tuberculosis (strain CDC 1551 / Oshkosh) OX=83331 GN=MT3759 PE=3 SV=1 && PF00437:Type II/IV secretion system protein	-	105	90	73	511	496	541	14.6394	14.3017	11.4221	84.5616	84.001	106.703
Rv3660c	277.14	260.479	242.44	1262.79	1373.14	1751.62	2.49012	4.71e-65	6.95e-63	Rv3660c	NC_000962.3	4098096	4099148	-	1053	protein_coding	hypothetical protein&&sp|P9WKX6|Y3660_MYCTO Uncharacterized protein MT3760 OS=Mycobacterium tuberculosis (strain CDC 1551 / Oshkosh) OX=83331 GN=MT3760 PE=3 SV=1 && -	-	326	269	253	1249	1337	1458	45.7109	42.9896	39.8119	207.866	227.72	289.204
Rv3664c	153.872	156.868	137.99	73.8062	87.2979	52.861	-1.06163	3.44e-06	1.48e-05	dppC	NC_000962.3	4103675	4104475	-	801	protein_coding	dipeptide ABC transporter permease DppC&&sp|P94312|DPPC_ALKPO Dipeptide transport system permease protein DppC OS=Alkalihalobacillus pseudofirmus (strain ATCC BAA-2126 / JCM 17055 / OF4) OX=398511 GN=dppC PE=3 SV=1 && PF00528:Binding-protein-dependent transport system inner membrane component	BPD_transp_1	181	162	144	73	85	44	33.3639	34.0347	29.7886	15.9712	19.032	11.4735
Rv3675	504.123	647.808	614.246	252.761	269.083	260.701	-1.17348	1.35e-15	1.59e-14	Rv3675	NC_000962.3	4116002	4116379	+	378	protein_coding	membrane protein&&-- && -	-	593	669	641	250	262	217	231.629	297.834	280.987	115.904	124.311	119.907
Rv3686c	563.631	570.342	566.333	129.414	231.083	231.867	-1.52446	2.32e-16	2.92e-15	Rv3686c	NC_000962.3	4128751	4129083	-	333	protein_coding	hypothetical protein&&-- && -	-	663	589	591	128	225	193	293.968	297.653	294.079	67.3619	121.182	121.057
Rv3690	268.639	328.261	347.849	146.601	168.434	146.569	-1.03101	2.3e-09	1.55e-08	Rv3690	NC_000962.3	4131739	4132392	+	654	protein_coding	membrane protein&&-- && PF13559:Domain of unknown function (DUF4129)	-	316	339	363	145	164	122	71.3411	87.2291	91.9707	38.8543	44.9743	38.9635
Rv3706c	642.693	476.415	441.759	148.623	173.569	115.333	-1.83179	2.47e-22	4.83e-21	Rv3706c	NC_000962.3	4149591	4149911	-	321	protein_coding	hypothetical protein&&-- && -	-	756	492	461	147	169	96	347.734	257.929	237.967	80.2529	94.4236	62.4657
Rv3717	948.737	976.069	919.932	198.165	343.029	240.277	-1.86323	1.84e-28	5.63e-27	Rv3717	NC_000962.3	4161048	4161773	+	726	protein_coding	hypothetical protein&&sp|I6Y4D2|PEPAM_MYCTU N-acetylmuramoyl-L-alanine amidase Rv3717 OS=Mycobacterium tuberculosis (strain ATCC 25618 / H37Rv) OX=83332 GN=Rv3717 PE=1 SV=1 && PF01520:N-acetylmuramoyl-L-alanine amidase	-	1116	1008	960	196	334	200	226.964	233.649	219.106	47.3116	82.5104	57.5399
Rv3764c	1170.62	1183.29	1104.88	553.041	611.085	528.61	-1.03012	2.54e-18	3.63e-17	tcrY	NC_000962.3	4209582	4211009	-	1428	protein_coding	two component sensor kinase TcrY&&sp|O69729|TCRY_MYCTU Probable sensor histidine kinase TcrY OS=Mycobacterium tuberculosis (strain ATCC 25618 / H37Rv) OX=83332 GN=tcrY PE=1 SV=1 && PF00512:His Kinase A (phospho-acceptor) domain|PF02518:Histidine kinase-, DNA gyrase B-, and HSP90-like ATPase|PF00672:HAMP domain	HATPase_c	1377	1222	1153	547	595	440	142.376	144.007	133.789	67.1286	74.7287	64.3576
Rv3776	173.425	173.33	219.442	654.145	842.168	881.817	2.07066	3.12e-38	1.52e-36	Rv3776	NC_000962.3	4221089	4222648	+	1560	protein_coding	hypothetical protein&&sp|P72042|Y3776_MYCTU Uncharacterized protein Rv3776 OS=Mycobacterium tuberculosis (strain ATCC 25618 / H37Rv) OX=83332 GN=Rv3776 PE=4 SV=1 && PF02720:Domain of unknown function (DUF222)	DUF222	204	179	229	647	820	734	19.3079	19.3094	24.3238	72.6822	94.2732	98.2759
Rv3789	361.302	381.519	371.806	194.12	154.055	156.18	-1.14174	1.04e-12	9.89e-12	Rv3789	NC_000962.3	4235374	4235739	+	366	protein_coding	GtrA family protein&&sp|P64293|AGBR_MYCBO Arabinogalactan biosynthesis recruiting protein Mb3818 OS=Mycobacterium bovis (strain ATCC BAA-935 / AF2122/97) OX=233413 GN=BQ2027_MB3818 PE=3 SV=1 && PF04138:GtrA-like protein	-	425	394	388	192	150	130	171.45	181.157	175.659	91.9324	73.5037	74.1887
Rv3791	929.184	1008.02	1056.96	464.069	488.868	428.895	-1.11415	1.8e-19	2.83e-18	dprE2	NC_000962.3	4237165	4237929	+	765	protein_coding	decaprenylphosphoryl-D-2-keto erythropentose reductase&&sp|P66784|DPRE2_MYCBO Decaprenylphosphoryl-2-keto-beta-D-erythro-pentose reductase OS=Mycobacterium bovis (strain ATCC BAA-935 / AF2122/97) OX=233413 GN=dprE2 PE=3 SV=1 && PF00106:short chain dehydrogenase	adh_short	1093	1041	1103	459	476	357	210.955	228.997	238.91	105.148	111.595	97.4725
Rv3795	2282.58	2317.2	2365.95	1012.05	1164.66	988.74	-1.1373	4.57e-25	1.04e-23	embB	NC_000962.3	4246514	4249810	+	3297	protein_coding	arabinosyltransferase B&&sp|P9WNL6|EMBB_MYCTO Probable arabinosyltransferase B OS=Mycobacterium tuberculosis (strain CDC 1551 / Oshkosh) OX=83331 GN=embB PE=3 SV=1 && PF14896:EmbC C-terminal domain|PF17689:Arabinosyltransferase concanavalin like domain|PF04602:Mycobacterial cell wall arabinan synthesis protein	-	2685	2393	2469	1001	1134	823	120.242	122.142	124.086	53.2064	61.6869	52.1382
Rv3810	3617.27	3349.43	3040.57	1125.29	1494.33	1267.46	-1.36435	4.78e-27	1.27e-25	pirG	NC_000962.3	4273739	4274593	+	855	protein_coding	cell surface protein&&sp|P0A5P5|ERP_MYCBO Exported repetitive protein OS=Mycobacterium bovis (strain ATCC BAA-935 / AF2122/97) OX=233413 GN=erp PE=3 SV=1 && PF01744:GLTT repeat (6 copies)	-	4255	3459	3173	1113	1455	1055	734.791	680.807	614.928	228.127	305.208	257.728
Rv3811	3000.08	2798.45	2961.99	1182.92	1381.36	1361.17	-1.15859	1.24e-26	3.26e-25	Rv3811	NC_000962.3	4274798	4276417	+	1620	protein_coding	hypothetical protein&&-- && PF08310:LGFP repeat|PF01510:N-acetylmuramoyl-L-alanine amidase	-	3529	2890	3091	1170	1345	1133	321.638	300.208	316.158	126.567	148.904	146.08
Rv3819	539.828	545.166	485.839	208.275	261.894	165.791	-1.30082	7.25e-15	7.99e-14	Rv3819	NC_000962.3	4283996	4284331	+	336	protein_coding	hypothetical protein&&-- && -	-	635	563	507	206	255	138	279.039	281.974	250.028	107.443	136.113	85.7858
Rv3823c	2711.89	2276.53	1813.99	547.986	735.356	606.7	-1.84771	7.49e-33	2.87e-31	mmpL8	NC_000962.3	4288260	4291529	-	3270	protein_coding	integral membrane transport protein MmpL8&&sp|A5U9F2|MMPL8_MYCTA Probable transport protein MmpL8 OS=Mycobacterium tuberculosis (strain ATCC 25177 / H37Ra) OX=419947 GN=mmpL8 PE=3 SV=1 && PF03176:MMPL family	-	3190	2351	1893	542	716	505	144.037	120.989	95.9231	29.0469	39.2703	32.2566
Rv3824c	2815.61	2580.58	2025.77	282.081	389.246	403.666	-2.78945	2.31e-71	4.15e-69	papA1	NC_000962.3	4291639	4293174	-	1536	protein_coding	acyltransferase&&sp|Q7TVK9|PAPA1_MYCBO 2'-acyl-2-O-sulfo-trehalose (hydroxy)phthioceranyltransferase PapA1 OS=Mycobacterium bovis (strain ATCC BAA-935 / AF2122/97) OX=233413 GN=papA1 PE=3 SV=1 && PF00668:Condensation domain	-	3312	2665	2114	279	379	336	318.368	291.975	228.052	31.8318	44.2534	45.6902
Rv3825c	13483.8	12925.2	11804.8	2199.02	2914.72	2248.99	-2.37558	2.6e-81	5.97e-79	pks2	NC_000962.3	4293225	4299605	-	6381	protein_coding	phthioceranic/hydroxyphthioceranic acid synthase&&sp|Q7TVK8|PHAS_MYCBO Phthioceranic/hydroxyphthioceranic acid synthase OS=Mycobacterium bovis (strain ATCC BAA-935 / AF2122/97) OX=233413 GN=pks2 PE=3 SV=1 && PF00550:Phosphopantetheine attachment site|PF00109:Beta-ketoacyl synthase, N-terminal domain|PF08659:KR domain|PF00107:Zinc-binding dehydrogenase|PF14765:Polyketide synthase dehydratase|PF028…	Acyl_transf_1	15861	13348	12319	2175	2838	1872	367.005	352.02	319.895	59.7336	79.7668	61.2763
Rv3826	763.41	844.377	755.111	322.523	339.948	329.18	-1.25239	9.72e-23	1.97e-21	fadD23	NC_000962.3	4299812	4301566	+	1755	protein_coding	long-chain-fatty-acid--CoA ligase FadD23&&sp|Q7TVK7|FAA23_MYCBO Long-chain-fatty-acid--AMP ligase FadD23 OS=Mycobacterium bovis (strain ATCC BAA-935 / AF2122/97) OX=233413 GN=fadD23 PE=3 SV=1 && PF00501:AMP-binding enzyme	AMP-binding	898	872	788	319	331	274	75.5491	83.614	74.3994	31.8539	33.8259	32.6099
Rv3841	3939.47	6133.36	7691.97	20784	17135	26115.7	1.84986	6.17e-09	3.94e-08	bfrB	NC_000962.3	4314178	4314723	+	546	protein_coding	bacterioferritin BfrB&&sp|H8F1Z2|BFRB_MYCTE Ferritin BfrB OS=Mycobacterium tuberculosis (strain ATCC 35801 / TMC 107 / Erdman) OX=652616 GN=bfrB PE=2 SV=2 && PF00210:Ferritin-like domain	Ferritin	4634	6334	8027	20557	16684	21738	1253.12	1952.2	2436.02	6598.05	5480.33	8315.77
Rv3849	1074.55	1213.31	1115.42	396.329	387.192	404.867	-1.51804	2.45e-36	1.1e-34	espR	NC_000962.3	4323499	4323897	+	399	protein_coding	ESX-1 transcriptional regulator EspR&&sp|P9WJB6|ESPR_MYCTO Nucleoid-associated protein EspR OS=Mycobacterium tuberculosis (strain CDC 1551 / Oshkosh) OX=83331 GN=espR PE=3 SV=1 && -	-	1264	1253	1164	392	377	337	467.74	528.467	483.393	172.172	169.46	176.414
Rv3854c	339.199	458.017	374.681	2176.78	2254.34	3405.93	2.74186	5.23e-59	5.54e-57	ethA	NC_000962.3	4326004	4327473	-	1470	protein_coding	monooxygenase EthA&&sp|Q7TVI2|ETHA_MYCBO FAD-containing monooxygenase EthA OS=Mycobacterium bovis (strain ATCC BAA-935 / AF2122/97) OX=233413 GN=ethA PE=1 SV=1 && PF13450:NAD(P)-binding Rossmann-like domain|PF00743:Flavin-binding monooxygenase-like	FMO-like	399	473	391	2153	2195	2835	40.0761	54.1481	44.0737	256.67	267.803	402.82
Rv3855	302.644	325.356	386.18	1770.34	1851.74	2382.35	2.56608	8.88e-70	1.47e-67	ethR	NC_000962.3	4327549	4328199	+	651	protein_coding	HTH-type transcriptional repressor EthR&&sp|Q7TVI1|ETHR_MYCBO HTH-type transcriptional regulator EthR OS=Mycobacterium bovis (strain ATCC BAA-935 / AF2122/97) OX=233413 GN=ethR PE=1 SV=1 && PF00440:Bacterial regulatory proteins, tetR family	TetR_N	356	336	403	1751	1803	1983	80.742	86.8556	102.576	471.361	496.722	636.234
Rv3857c	1045.65	1140.68	1180.58	460.025	496.057	494.971	-1.21442	2.73e-24	6e-23	Rv3857c	NC_000962.3	4329417	4329614	-	198	protein_coding	membrane protein&&-- && -	-	1230	1178	1232	455	483	412	917.213	1001.2	1031.02	402.712	437.503	434.618
Rv3888c	2127.86	2198.09	2066.97	1069.68	1053.74	989.942	-1.0375	2.39e-23	4.98e-22	Rv3888c	NC_000962.3	4371681	4372706	-	1026	protein_coding	membrane protein&&sp|P9WJC4|ESPI_MYCTO ESX-1 secretion-associated protein EspI OS=Mycobacterium tuberculosis (strain CDC 1551 / Oshkosh) OX=83331 GN=espI PE=3 SV=1 && -	-	2503	2270	2157	1058	1026	824	360.2	372.322	348.356	180.712	179.349	167.747
RVnc0018	86.7125	50.3528	91.9932	109.193	164.325	189.819	1.01123	0.000118118	0.000394109	mcr16	NC_000962.3	2517032	2517134	-	103	protein_coding	Putative small regulatory RNA&&sp|P63459|FABD_MYCBO Malonyl CoA-acyl carrier protein transacylase OS=Mycobacterium bovis (strain ATCC BAA-935 / AF2122/97) OX=233413 GN=fabD PE=3 SV=1 && -	-	102	52	96	108	160	158	146.215	84.9583	154.438	183.753	278.6	320.402
RVnc0024	1004.84	1159.08	1035.88	259.838	306.056	278.721	-1.92127	3.45e-48	2.5e-46	mcr7	NC_000962.3	2692172	2692521	+	350	protein_coding	Putative small regulatory RNA&&-- && -	-	1182	1197	1081	257	298	232	498.632	575.527	511.774	128.681	152.703	138.451
RVnc0034	24.6536	22.2714	25.8731	13.1436	13.3514	7.20831	-1.09822	0.0260544	0.0497731	MTS0858	NC_000962.3	1220388	1220487	-	100	protein_coding	Putative small regulatory RNA&&-- && -	-	29	23	27	13	13	6	42.8182	38.705	44.7388	22.782	23.3154	12.5322
Rvnt02	141.12	179.14	167.696	68.751	62.649	75.6873	-1.23788	1.3e-08	7.92e-08	alaT	NC_000962.3	11112	11184	+	73	protein_coding	tRNA-Ala&&-- && -	-	166	185	175	68	61	63	335.75	426.47	397.224	163.243	149.867	180.257
Rvnt15	40.8059	30.9863	29.7061	12.1325	24.6488	13.2152	-1.01869	0.0186998	0.0373093	alaV	NC_000962.3	1113511	1113583	+	73	protein_coding	tRNA-Ala&&-- && -	-	48	32	31	12	24	11	97.0842	73.7678	70.3654	28.8076	58.964	31.4735
Rvnt32	80.7616	76.4975	105.409	57.6295	46.2165	15.618	-1.12191	0.00108294	0.00292224	glyT	NC_000962.3	2969753	2969825	+	73	protein_coding	tRNA-Gly&&-- && -	-	95	79	110	57	45	13	192.146	182.114	249.684	136.836	110.558	37.196
Rvnt43	61.2088	77.4658	64.2036	33.3644	28.7569	32.4374	-1.10063	0.000301628	0.000916186	argU	NC_000962.3	4216865	4216937	-	73	protein_coding	tRNA-Arg&&-- && -	-	72	80	67	33	28	27	145.626	184.419	152.08	79.2209	68.7914	77.2532
Rvnt45	20.4029	13.5565	25.8731	31.3424	79.0816	40.8471	1.33938	0.00131411	0.00348462	serU	NC_000962.3	4222581	4222667	-	87	protein_coding	tRNA-Ser&&-- && -	-	24	14	27	31	77	34	40.7307	27.08	51.4239	62.444	158.734	81.6272
sRNA00006	442.064	331.166	347.849	2071.63	1783.96	3099.57	2.63152	1.47e-48	1.11e-46	-	NC_000962.3	528956	529039	-	84	-	-	-	520	342	363	2049	1737	2580	914.017	685.151	716.057	4274.75	3708.68	6415.28
sRNA00007	68.0098	49.3845	54.621	133.458	131.46	135.757	1.21529	1.35e-07	7.11e-07	-	NC_000962.3	675739	675788	+	50	-	-	-	80	51	57	132	128	113	236.238	171.648	188.897	462.65	459.133	472.045
sRNA00009	5.95086	9.68323	7.6661	16.1767	23.6218	31.236	1.60827	0.00316209	0.00765344	-	NC_000962.3	749952	750018	-	67	-	-	-	7	10	8	16	23	26	15.426	25.1168	19.785	41.8498	61.5675	81.0539
sRNA00020	27.2039	37.7646	24.9148	61.6737	62.649	88.9025	1.24402	8.46e-05	0.000291391	-	NC_000962.3	1665447	1665497	+	51	-	-	-	32	39	26	61	61	74	92.6425	128.687	84.4741	209.608	214.515	303.066
sRNA00026	260.988	311.8	290.353	129.414	144.812	114.132	-1.14828	6.68e-11	5.31e-10	-	NC_000962.3	2501373	2501422	-	50	-	-	-	307	322	303	128	141	95	906.564	1083.74	1004.14	448.63	505.764	396.852
sRNA00038	16.1523	9.68323	5.74957	52.5743	83.1897	98.5136	2.86993	1.91e-12	1.77e-11	-	NC_000962.3	3784213	3784276	+	64	-	-	-	19	10	6	52	81	82	43.8333	26.2942	15.5343	142.387	226.988	267.614
sRNA00042	75.6609	77.4658	77.6193	141.546	160.217	192.222	1.09543	2.38e-07	1.21e-06	-	NC_000962.3	4261255	4261324	+	70	-	-	-	89	80	81	140	156	160	187.725	192.323	191.738	350.492	399.692	477.416
sRNA00046	149.622	291.465	310.477	818.946	795.951	1104.07	1.85704	1.17e-18	1.7e-17	-	NC_000962.3	4314479	4314535	-	57	-	-	-	176	301	324	810	775	919	455.898	888.651	941.869	2490.34	2438.52	3367.57
